# Supplementary material for: Simplified preparation of a graphene-co-shelled Ni/NiO@C nano-catalyst and its application in the N-dimethylation synthesis of amines under mild conditions
Source: Royal Society of Chemistry journal article supplement (doi:10.1039/d1gc00981h), 2021-01-01

## Supplementary Material for

### Simplified preparation of graphene-co-shelled Ni/NiO@C nano-catalyst and its application in the N-di-methylation synthesis of amines under mild conditions

Jianguo Liu<sup>1, 2\*#</sup>, Yanpei Song<sup>1, 3#</sup>, Xiuzheng Zhuang<sup>1, 3</sup>, Mingyue Zhang<sup>1, 3</sup>, Longlong Ma<sup>1\*</sup>

<sup>1</sup> CAS Key Laboratory of Renewable Energy, Guangdong Provincial Key Laboratory of New and Renewable Energy Research and Development, Guangzhou Institute of Energy Conversion, Chinese Academy of Sciences, Guangzhou 510640, P. R. China.

<sup>2</sup> Dalian National Laboratory for Clean Energy, Dalian 116023, P. R. China.

<sup>3</sup> University of Chinese Academy of Sciences, Beijing 100049, P. R. China.

\* Corresponding authors e-mail: liujg@ms.giec.ac.cn; mall@ms.giec.ac.cn

# These authors contributed equally to this work.

#### **This PDF file includes:**

Materials and Methods.

Fig. S1 to TEM spectra before and after reaction of Ni/NiO@C-700-200-2 h-EtOH.

Fig. S2 to XRD spectra before and after reaction of Ni/NiO@C-700-200-2 h-EtOH.

Fig. S3 to XPS spectra before and after reaction of Ni/NiO@C-700-200-2 h-EtOH.

Table S1 to EDS element before and after reaction of Ni/NiO@C-700-200-2 h-EtOH.

NMR and GC-MS spectra.

## **S1. Methods and materials**

All aldehydes and amines were obtained commercially from various chemical companies. 1,3,5-trimethoxybenzene was purchased from Sigma Aldrich Co., Ltd.; Ni(NO<sub>3</sub>)<sub>2</sub>·6H<sub>2</sub>O (AR, 98%), anhydrous citric acid (AR, ≥99.5%), CDCl<sub>3</sub> (99.8% D, stabilized with Ag) were obtained from Shanghai Macklin Biochemical Co., Ltd.; H<sub>2</sub>SO<sub>4</sub> (GR, 98%) was purchased from Sinopharm Chemical Reagent Co., Ltd.; Al<sub>2</sub>O<sub>3</sub> (basic, 200~300 meshes), ethanol (AR, 99.7%), methanol (GC, >99.9%) were purchased from Aladdin (Shanghai) Chemical Technology Co., Ltd.; Deionized water ( $\sigma < 5 \mu\text{S/m}$ ) was self-made in the laboratory. Before using, the purity of aldehydes and amines has been checked.

GC of products was recorded by GC-2014C (Shimadzu, Japan) with HP5 column (30 m × 250 mm × 0.25 μm) and FID detector. GC-MS of products was determined by TRACE 1300ISQ GC-MS (Thermo Fisher Scientific, America) with TG-5MS column (30 m × 250 mm × 0.25 μm). <sup>1</sup>H NMR of products were recorded on a Bruker Avance III (400 MHz) spectrometer (Bruker BioSpin, Germany) with CDCl<sub>3</sub> as solvent at 400 MHz. The TEM measurements were conducted on a JEM-2100F microscope (JEOL, Japan) operated at 200 kV. The SEM images were obtained on Analytical SEM SU-70 (Hitachi, Japan) microscope operated at 10 kV. XPS measurements were performed on an Escalab250 Xi photoelectron spectrometer (Thermo Fisher Scientific, America) with Al K $\alpha$  X-ray radiation with scan number of 5. XRD powder patterns were recorded on an X'Pert Pro MPD diffractometer (PANalytical, Netherlands) using the Cu K $\alpha$  radiation at 40 kV and 20 mA ( $\lambda = 1.5406 \text{ \AA}$ ). Processing and assignments of the powder patterns were conducted on the software Jade 6.0 using the Powder Diffraction File (PDF) database of the International Centre of Diffraction Data (ICDD). Nitrogen adsorption isotherms were measured at -196 °C on a Quadrasorb SI nitrogen adsorption apparatus (Quantachrome, America) by using the BET method.

## **S2. General preparation of catalysts**

### **S2.1. Preparation of Ni@C-H<sub>2</sub>O**

In a typical synthesis procedure, nickel (II) nitrate hexahydrate (Ni(NO<sub>3</sub>)<sub>2</sub>·6 H<sub>2</sub>O, 0.03 mol) and citric acid (C<sub>6</sub>H<sub>8</sub>O<sub>7</sub>, 0.03 mol) were dissolved in deionized water (5 mL). The mixture was then aged at 70 °C for 8 h under stirring (300 rpm) until to obtain a transparent greenish gel, followed by drying at 100 °C for 72 h in a drying oven to remove the excess water. The obtained greenish solid was then calcining at fixed bed at 600 or 700 °C for 3 h under a high-purity N<sub>2</sub> (99.999 %) flow of 40 mL min<sup>-1</sup>. The heating rate was controlled at 2 °C min<sup>-1</sup>. The obtained black solids were treated in 1 M H<sub>2</sub>SO<sub>4</sub> aqueous solution at 70 °C until the solution colorless to remove the insecure and uncovered Ni particles. The black solids were then full washed with deionized water until pH of waste solution was 7. Then, the black solids were dried at -48 °C for 12 h in vacuum by using a freeze dryer. The dried black solids denoted as Ni@C-x-H<sub>2</sub>O, where x is calcining temperature of greenish gel, such as Ni@C-600-H<sub>2</sub>O or Ni@C-700-H<sub>2</sub>O.

### **S2.2. Preparation of Ni@C-EtOH**

In a typical synthesis procedure, nickel nitrate hexahydrate (Ni(NO<sub>3</sub>)<sub>2</sub>·6 H<sub>2</sub>O, 0.03 mol) and citric acid (C<sub>6</sub>H<sub>8</sub>O<sub>7</sub>, 0.03 mol) were dissolved in anhydrous ethanol (5 mL). The mixture was then aged at 70 °C for 4 h under stirring (300 rpm) until to obtain a bubble-shaped greenish gel, followed by drying at 100 °C for 24 h in a drying oven to remove the excess solvent. The obtained greenish solid was then calcining at fixed bed at 600 or 700 °C for 3 h under a high-purity N<sub>2</sub> (99.999 %) flow of 40 mL·min<sup>-1</sup>. The heating rate was controlled at 2 °C·min<sup>-1</sup>. The obtained black solids were treated in 1 M H<sub>2</sub>SO<sub>4</sub>

aqueous solution at 70 °C until the solution colorless to remove the insecure and uncovered Ni particles. The black solids were then full washed with deionized water until pH of waste solution was 7. Finally, the black solids were dried at -48 °C for 12 h in vacuum by using a freeze dryer. The dried black solids denoted as Ni@C-x-EtOH, where x is calcining temperature of greenish gel, such as Ni@C-600-EtOH and Ni@C-700-EtOH.

### **S2.3. Preparation of Ni-NiO@Cs**

In a typical synthesis procedure, Ni@C-H<sub>2</sub>O and Ni@C-EtOH were grinded and sieved to powders of 800 meshes and then were heated at fixed bed at 200 °C for 1 or 2 h under argon (containing 1 vol% O<sub>2</sub>) flow of 30 mL·min<sup>-1</sup>. All these materials were labeled as M1/M2@C-x-y-z-s, where M1=Ni; M2=NiO; x denotes the pyrolysis temperature; y denotes the oxidation temperature; z denotes the oxidation time; and s denotes the solvent, respectively.

## **S3. Procedure for the synthesis of N-methylamines**

### **S3.1. Reductive N-methylation of amines and aldehydes**

The reaction was conducted in a stainless-steel autoclave (Anhui Kemi Machinery Technology Co., Ltd, China) with six wells (10 mL per well), one thermocouple and one circulating water-cooling equipment. Each well has a glass lining, in which were loaded with one 10 mm magnetic stirring bar, 0.5 mmol corresponding amine, 3 mmol corresponding aldehyde, 0.05 mmol 1,3,5-trimethoxybenzene, 10 mg catalyst, and 5 mL methanol. Then, the autoclave was sealed and purged with H<sub>2</sub> three times at 2 MPa pressure and was pressurized with 2 MPa H<sub>2</sub>. The autoclave was placed into a heating mantle and the stirring rate was set at 300 rpm. The autoclave was preheated from room temperature to target temperature (inside temperature detected by thermocouple) at rate of 2 °C·min<sup>-1</sup>. The target temperature was used as the reaction temperature. The reaction was proceeded at the reaction temperature for require time. After the reaction, the remaining gas was discharged after the autoclave was cooled down to room temperature. The reaction solutions were collected with a dropper and filtered. The catalyst was immobilized on the magnetic stirring bar and washed thoroughly with ethanol and water. The catalyst (together with magnetic stirring bar) was then dried at -48 °C for 12 h in vacuum by using a freeze dryer.

The reaction products were identified by GC-MS and <sup>1</sup>H NMR and the yields of reaction products were determined by GC with 1,3,5-trimethoxybenzene as internal standard. For <sup>1</sup>H NMR analysis, about 2 mL reaction solutions were concentrated by rotary evaporation, and then added with 0.6 mL of CDCl<sub>3</sub> (preneutralized with basic Al<sub>2</sub>O<sub>3</sub>).

### **S3.2. Procedure for the gram scare reaction**

In a 500 mL stainless steel autoclave (WATTCAS, China) with one thermocouple, 1 g corresponding amine, corresponding aldehyde (3 mmol per 0.5 mmol amine), 1 mmol 1,3,5-trimethoxybenzene, one 30 mm magnetic stirring bar, Ni/NiO@C-700-200-2 h-EtOH (10 mg per 0.5 mmol amine) and methanol (5 mL per 0.5 mmol amine) were loaded. Then, the autoclave was sealed and purged with H<sub>2</sub> three times at 2 MPa pressure and was pressurized with 2 MPa H<sub>2</sub>. The autoclave was placed into a heating mantle and the stirring rate was set at 300 rpm. The autoclave was preheated from room temperature to target temperature (inside temperature detected by thermocouple) at rate of 2 °C·min<sup>-1</sup>. The target temperature was used as the reaction temperature. The reaction was proceeded at the reaction temperature for require time. After the reaction, the remaining gas was discharged after the autoclave was cooled down to room temperature. The reaction solutions were collected and filtered. The catalyst was immobilized on the magnetic stirring bar and washed thoroughly with ethanol and

water. The catalyst (together with magnetic stirring bar) was then dried at  $-48\text{ }^{\circ}\text{C}$  for 12 h in vacuum by using a freeze dryer.

### **S3.3. Procedure for the Ni/NiO@C-700-200-2 h-EtOH recycling**

The stability test of Ni/NiO@C-700-200-2 h-EtOH was performed in a stainless-steel autoclave (Anhui Kemi Machinery Technology Co., Ltd, China) with six wells (10 mL per well), one thermocouple and one circulating water-cooling equipment. The procedure of reaction and product analysis were similar to the S3.1 section. After one batch reaction, the collected catalyst (together with magnetic stirring bar) was thoroughly washed with ethanol and water. The catalyst (together with magnetic stirring bar) was dried at  $-48\text{ }^{\circ}\text{C}$  for 12 h in vacuum by using a freeze dryer and was used for the next cycle of reaction.

### **S3.4. Procedure for the two-step continuous reaction catalyzed by Ni/NiO@C-700-200-2 h-EtOH**

The reaction was conducted in a stainless-steel autoclave (Anhui Kemi Machinery Technology Co., Ltd, China) with six wells (10 mL per well), one thermocouple and one circulating water-cooling equipment. Each well has a glass lining, in which were loaded with one 10 mm magnetic stirring bar, 0.5 mmol corresponding aldehyde, 5 ml ammonia solution (2 M in methanol), 0.05 mmol 1,3,5-trimethoxybenzene, 10 mg catalyst. Then, the autoclave was sealed and purged with  $\text{H}_2$  three times at 2 MPa pressure and was pressurized with 2 MPa  $\text{H}_2$ . The autoclave was placed into a heating mantle and the stirring rate was set at 300 rpm. The autoclave was preheated from room temperature to target temperature (inside temperature detected by thermocouple) at rate of  $2\text{ }^{\circ}\text{C}\cdot\text{min}^{-1}$ . The target temperature was used as the reaction temperature. The reaction was proceeded at the reaction temperature for require time. After the reaction, the remaining gas was discharged after the autoclave was cooled down to room temperature. Open the reactor, add 3 mmol formaldehyde to each lining, seal the reactor again and purged with  $\text{H}_2$  three times at 2 MPa pressure and was pressurized with 2 MPa  $\text{H}_2$ . The autoclave was preheated from room temperature to target temperature (inside temperature detected by thermocouple) at rate of  $2\text{ }^{\circ}\text{C}\cdot\text{min}^{-1}$ . The target temperature was used as the reaction temperature. The reaction was proceeded at the reaction temperature for require time. After the reaction, the remaining gas was discharged after the autoclave was cooled down to room temperature. The reaction solution was collected with a dropper and filtered.

## **S4. TEM spectra before and after reaction of Ni/NiO@C-700-200-2 h-EtOH**

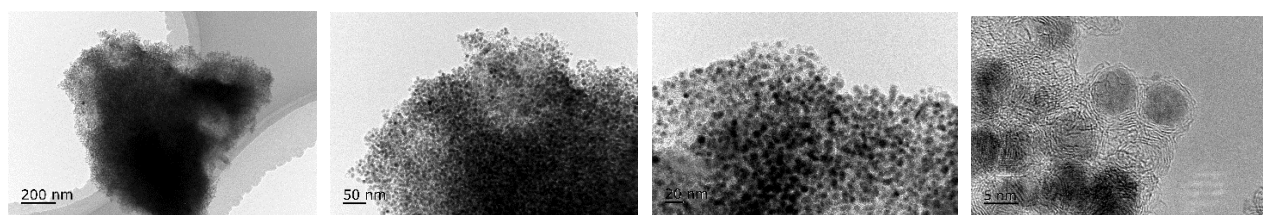

a. Ni/NiO@C-700-200-2 h-EtOH catalyst before the reaction

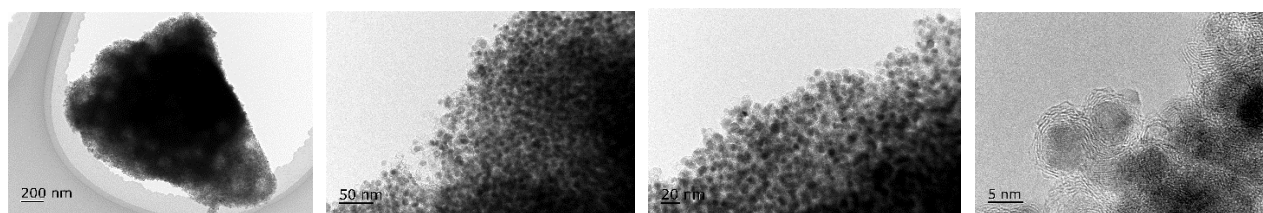

b. Ni/NiO@C-700-200-2 h-EtOH catalyst after the reaction

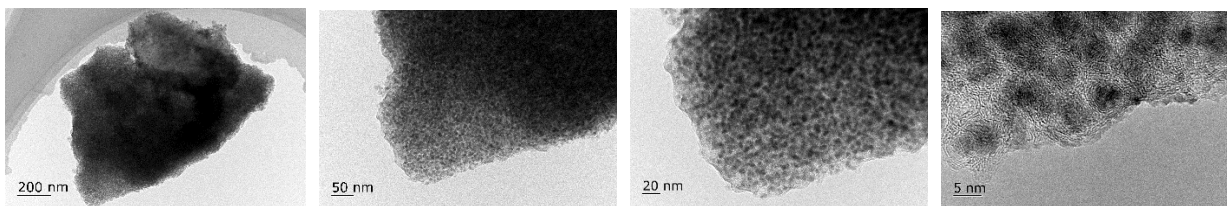

c. Ni/NiO@C-700-200-2 h-EtOH catalyst after the 10 times recycle reaction

### S5. XRD spectra before and after reaction of Ni/NiO@C-700-200-2 h-EtOH

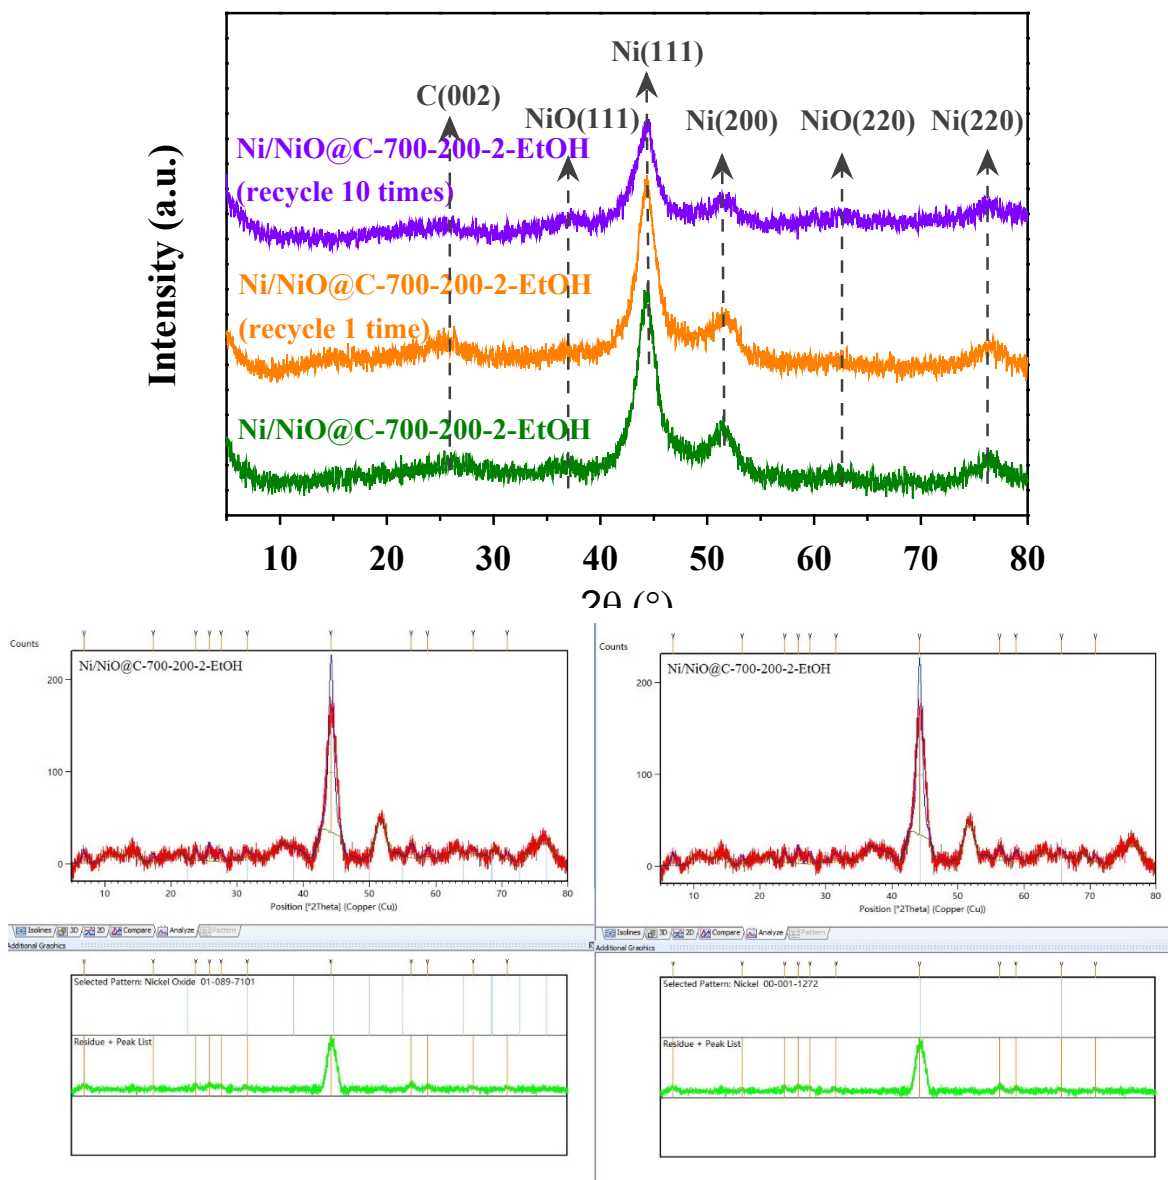

### S6. XPS spectra before and after reaction of Ni/NiO@C-700-200-2 h-EtOH

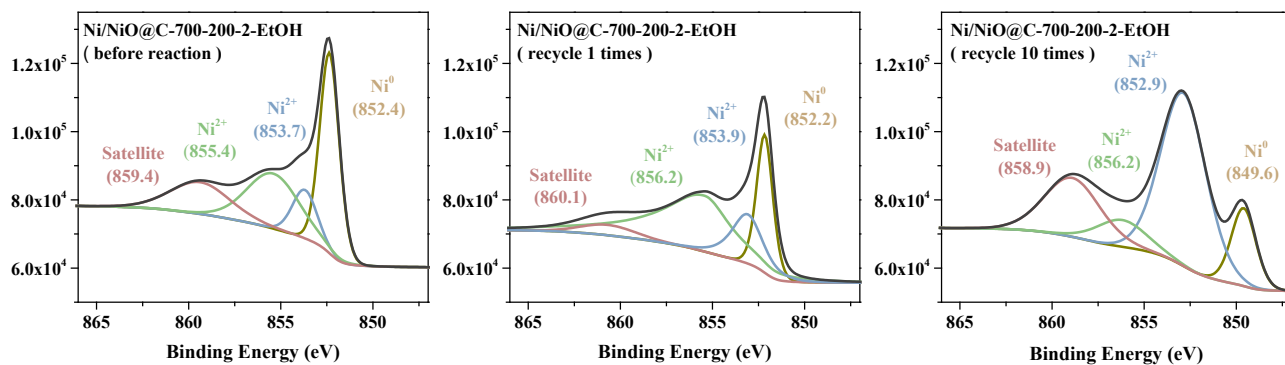

### S7. EDS element before and after reaction of Ni/NiO@C-700-200-2 h-EtOH

| catalyst            | C(%)  | O(%) | S(%) | Ni(%) |
|---------------------|-------|------|------|-------|
| before the reaction | 18.78 | 2.31 | 0.16 | 78.75 |
| after the reaction  | 32.35 | 5.31 | 0.08 | 62.27 |
| recycle 10 times    | 37.36 | 7.25 | 0.28 | 55.12 |

**S8. NMR and GCMS spectra (In our GC-MS procedure, the first 3 min is held at 40 °C to stabilize the baseline and to evaporate the methanol solution, so that this part is deleted in our result to emphasize the main peak for target products)**

1

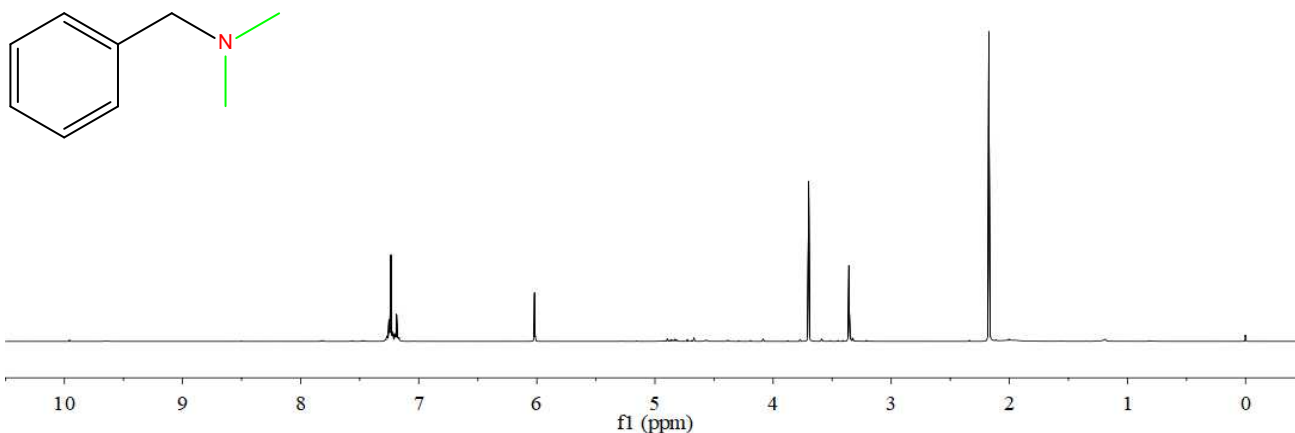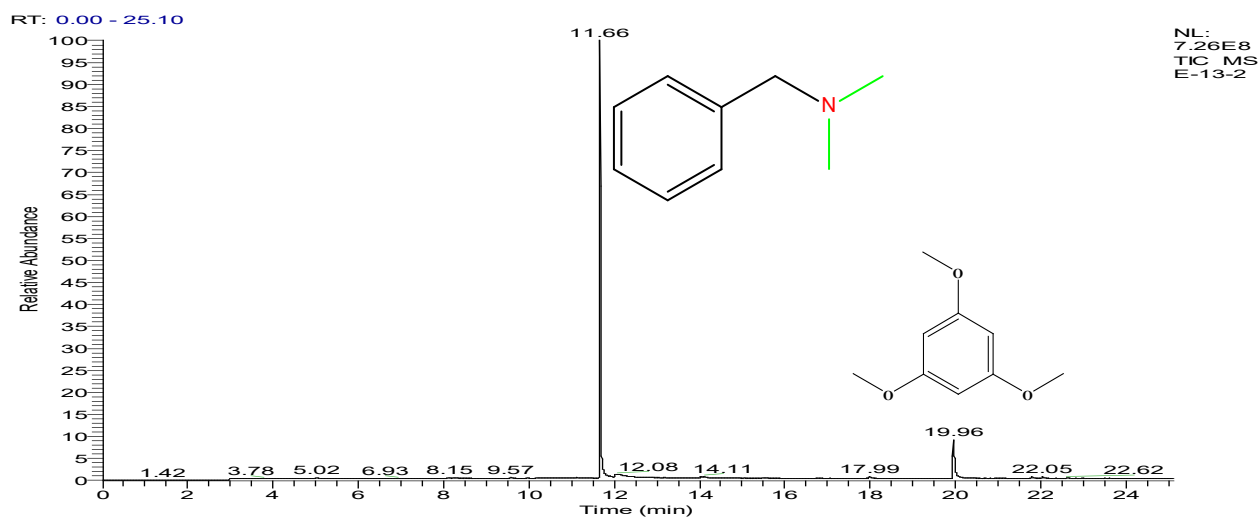

E-13-2 #3418 RT: 11.66 AV: 1 NL: 1.53E8  
T: + c EI Full ms [15.00-400.00]

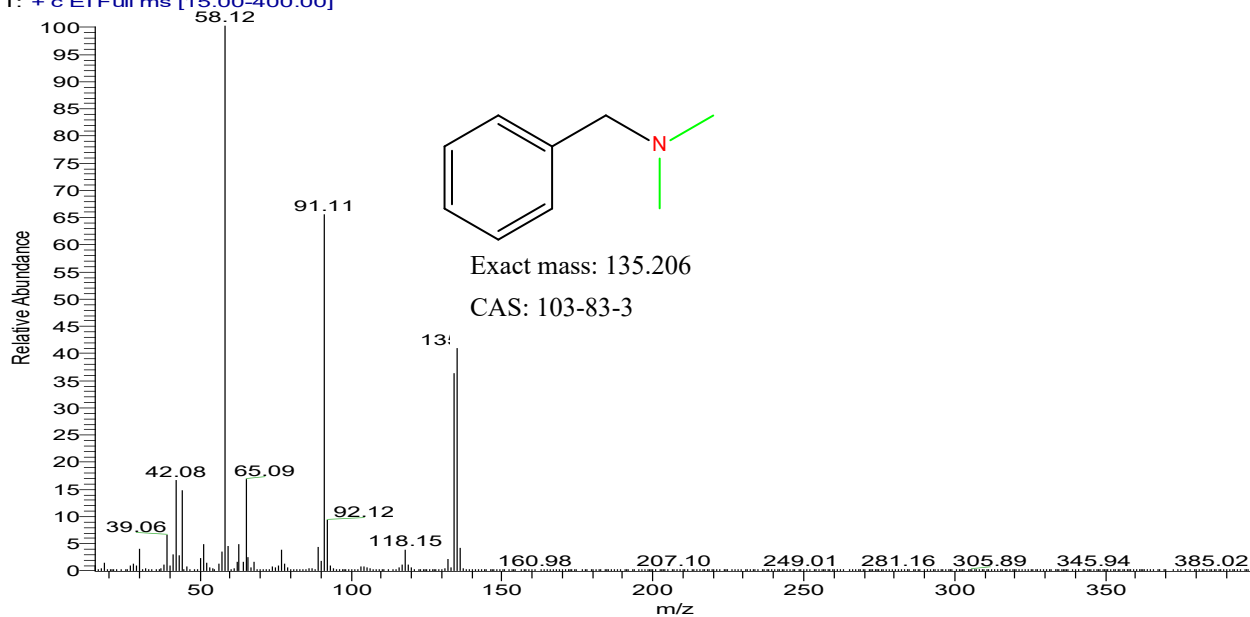

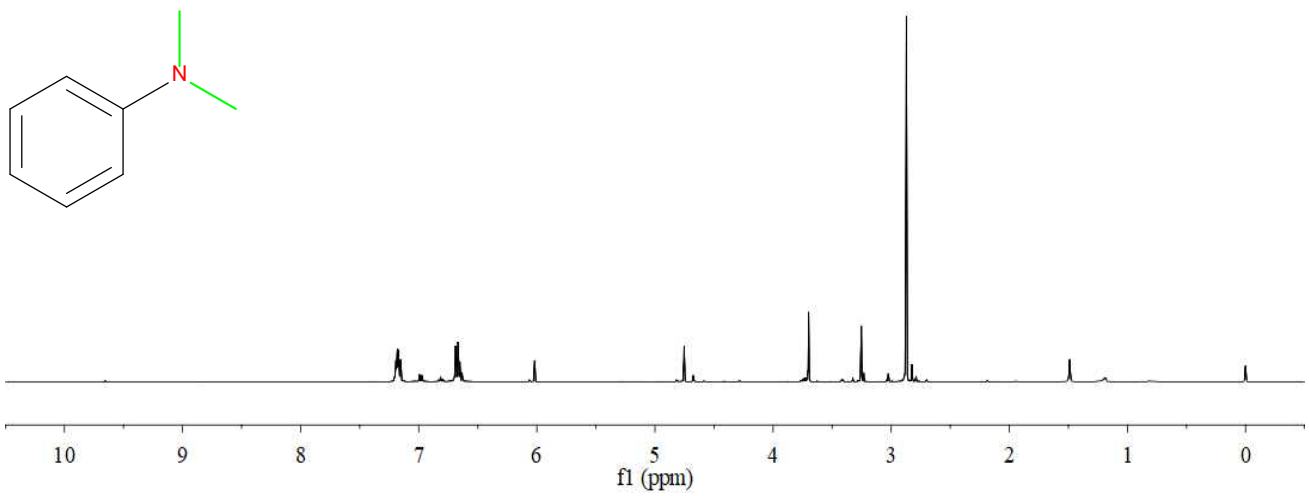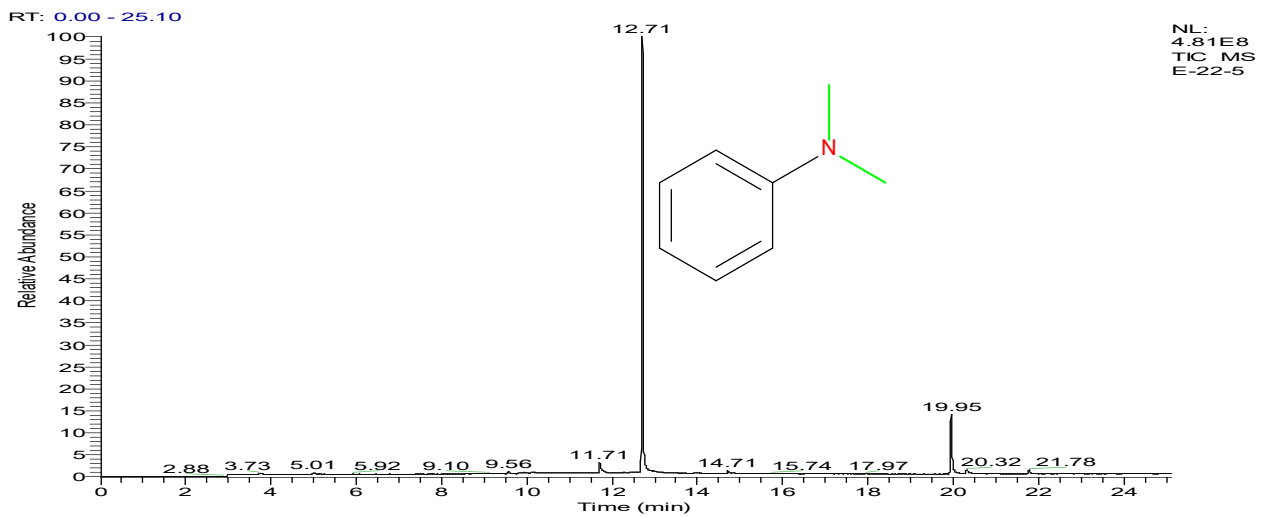

E-22-5 #3729 RT: 12.71 AV: 1 NL: 1.35E8  
T: + c EI Full ms [15.00-400.00]

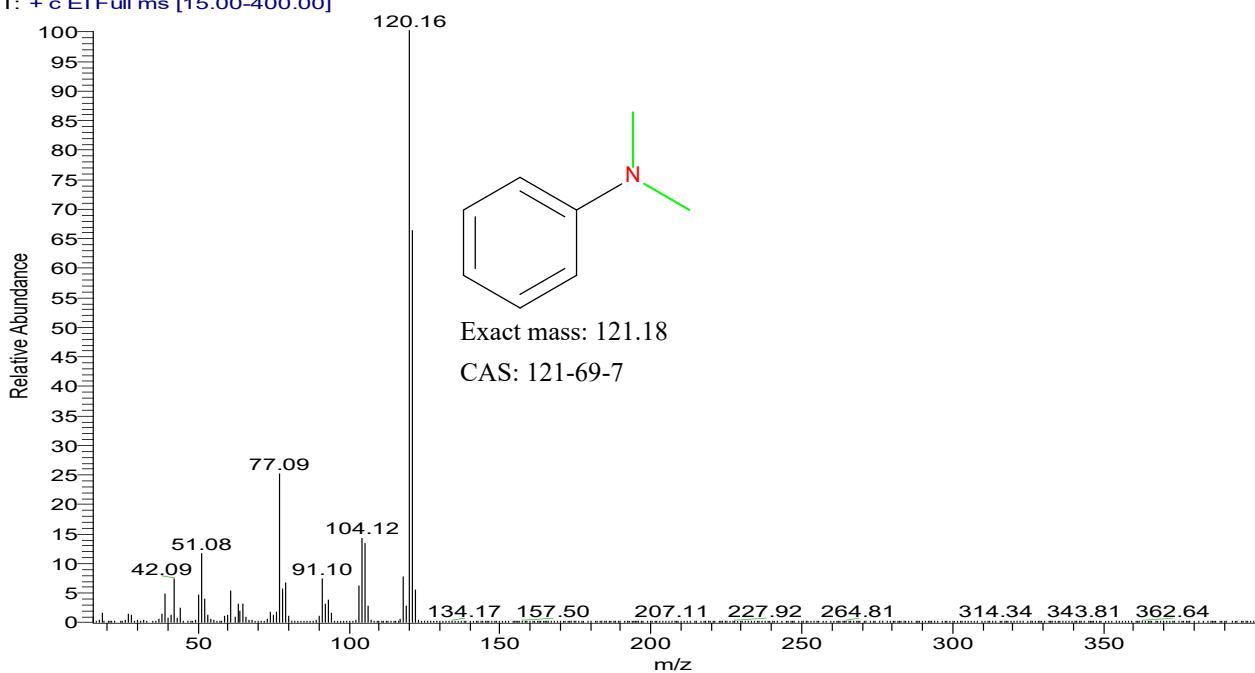



3

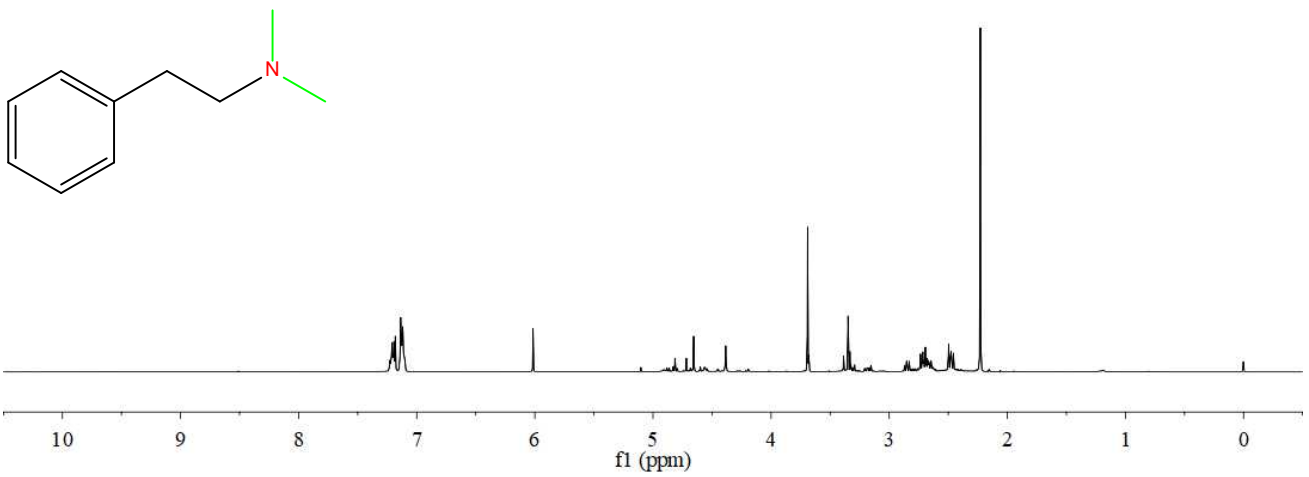

RT: 0.00 - 25.08

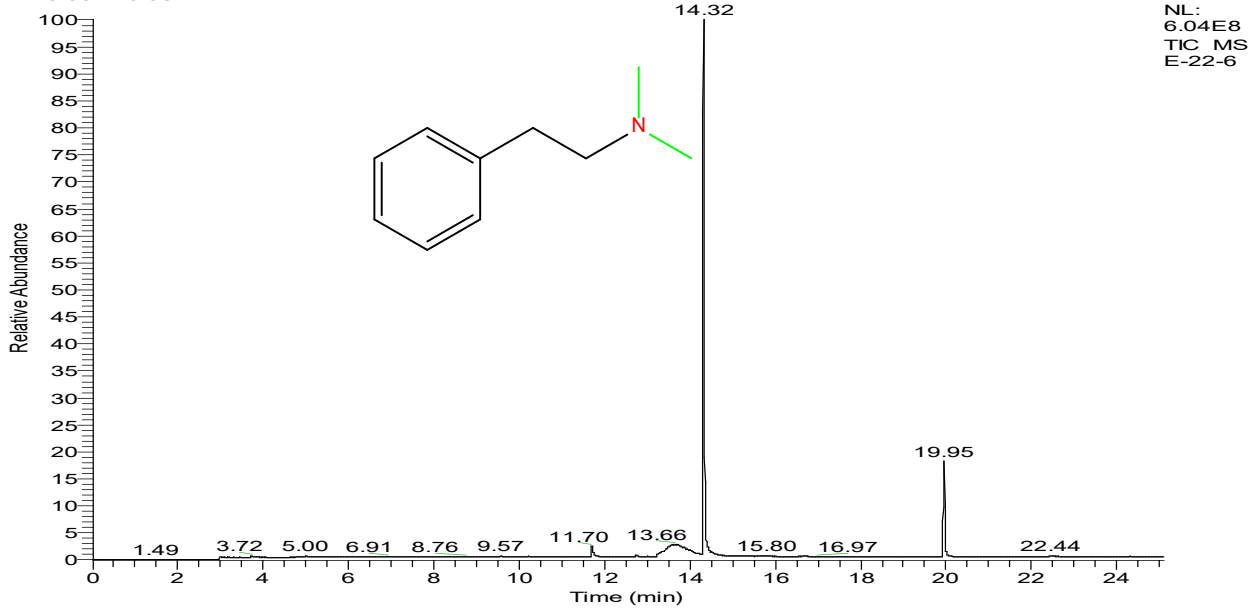

E-22-6 #4202 RT: 14.32 AV: 1 NL: 3.96E8  
T: +c EI Full ms [15.00-400.00]

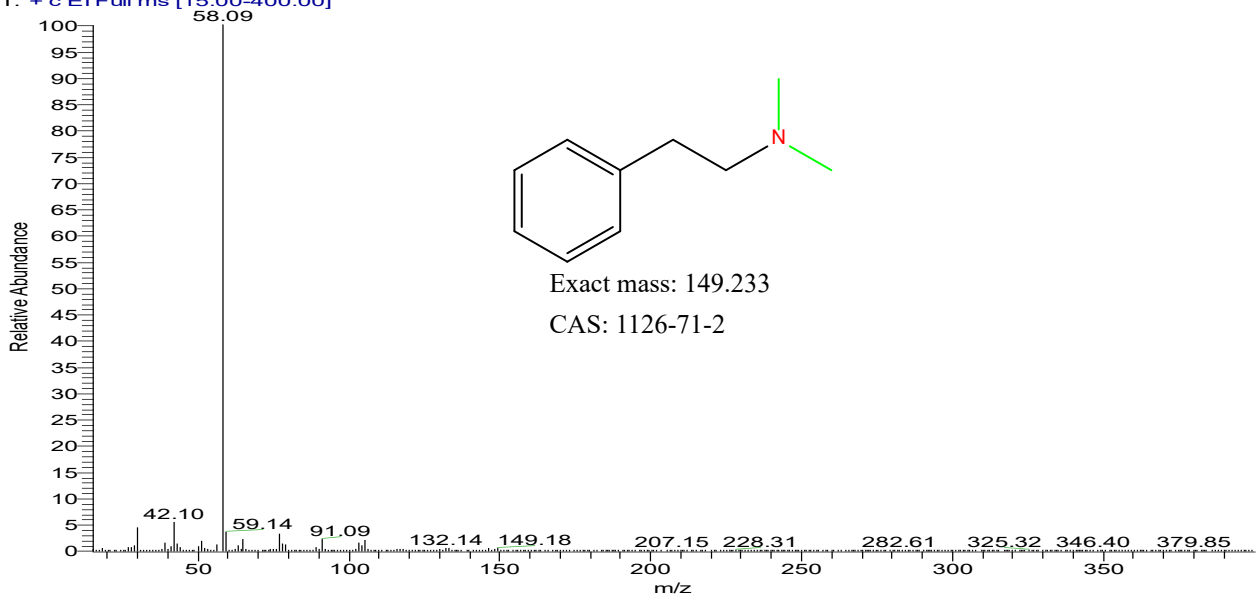

4

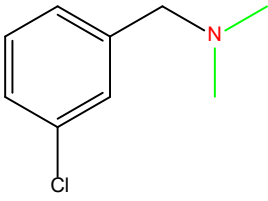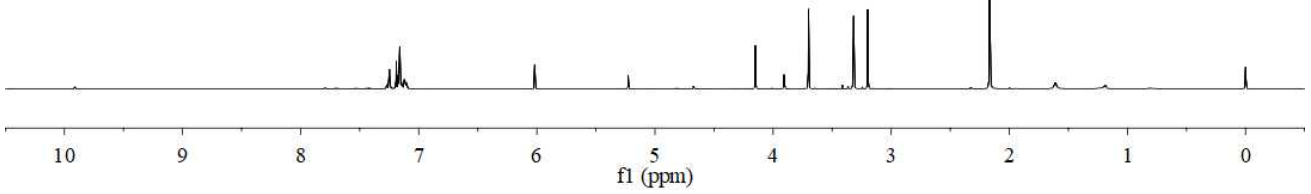

RT: 0.00 - 25.10

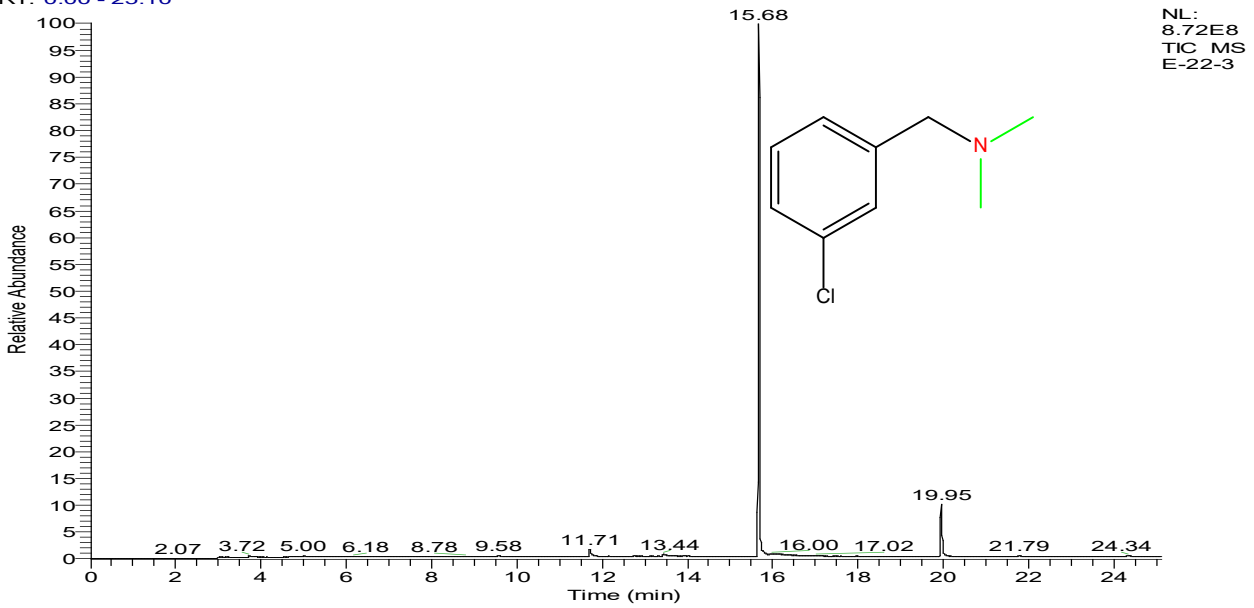

E-22-3 #4601 RT: 15.68 AV: 1 NL: 2.93E8  
T: + c EI Full ms [15.00-400.00]

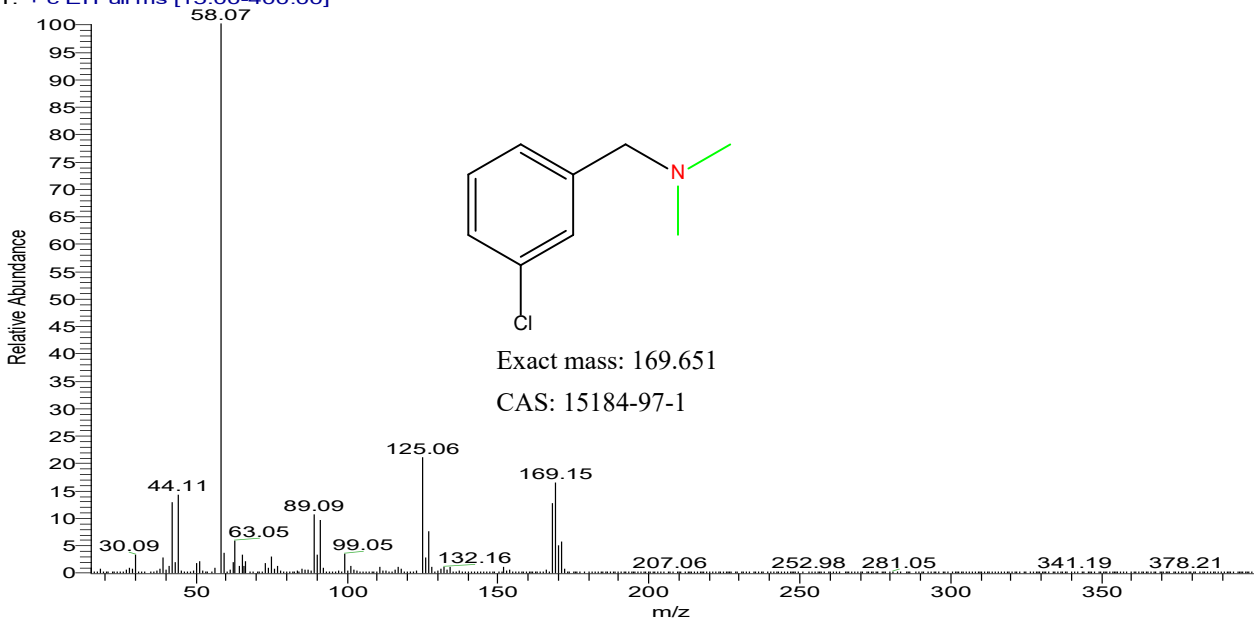

5

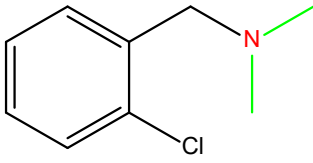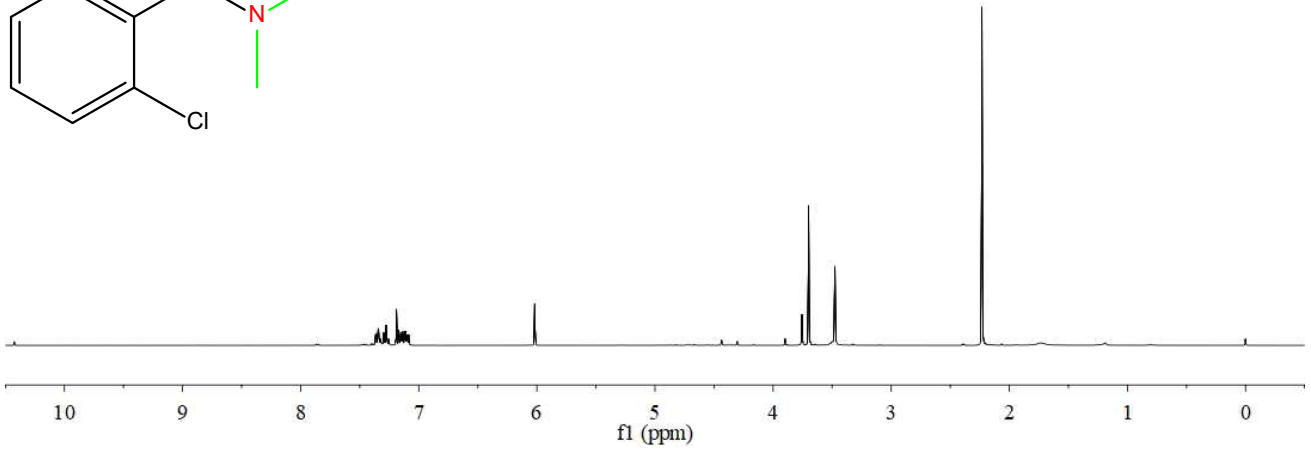

RT: 0.00 - 25.10

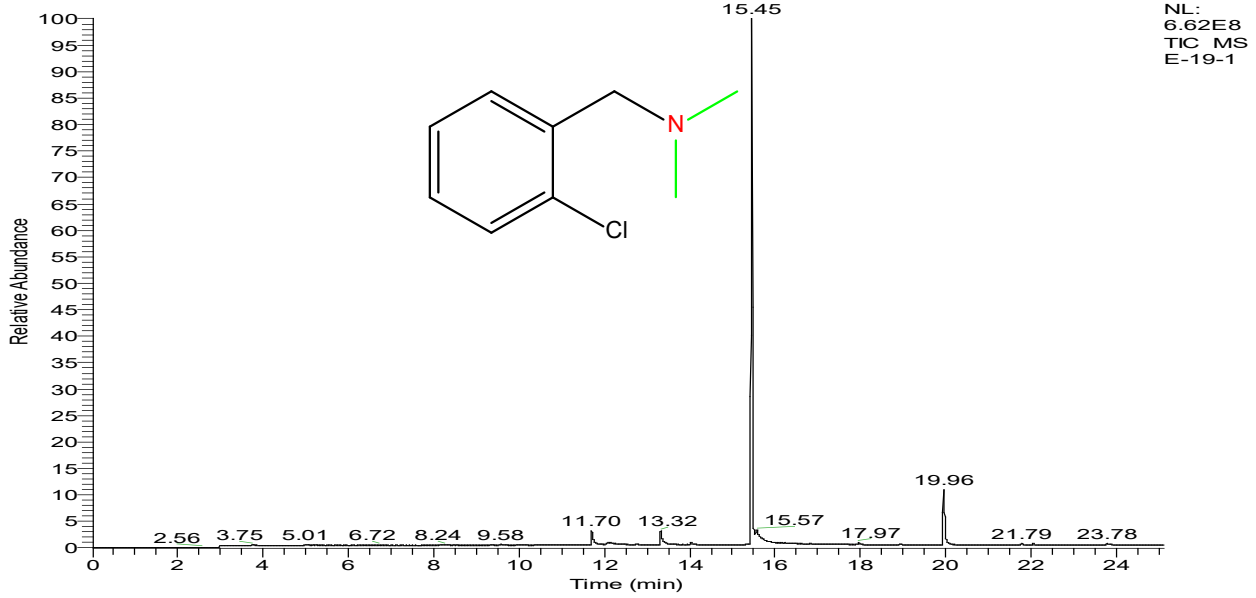

E-19-1 #4532 RT: 15.45 AV: 1 NL: 1.87E8

T: + c EI Full ms [15.00-400.00]

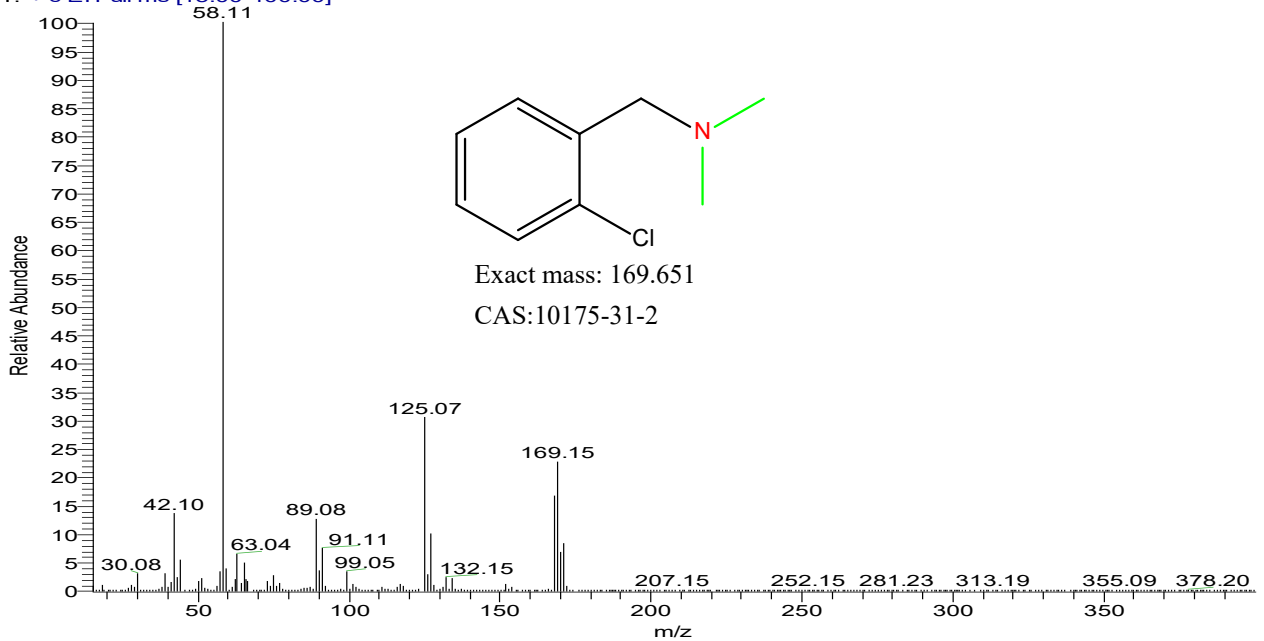

6

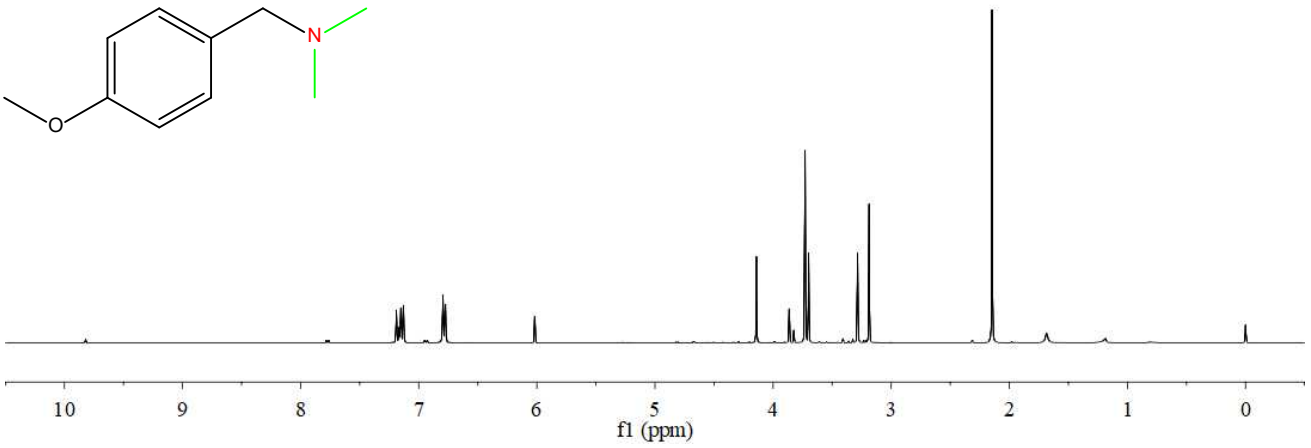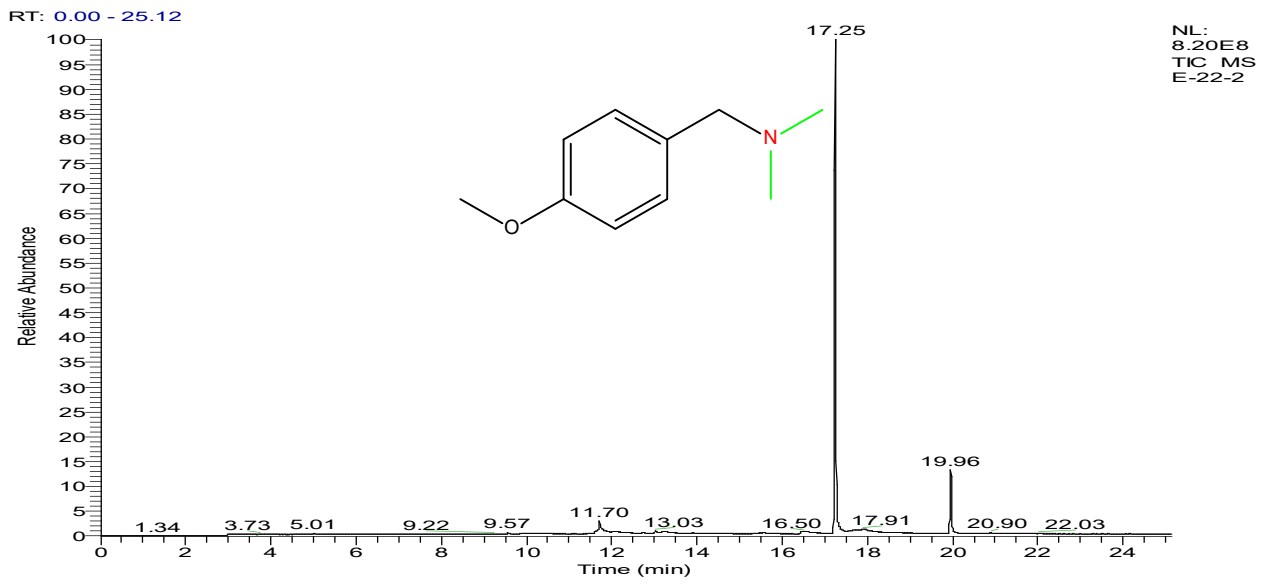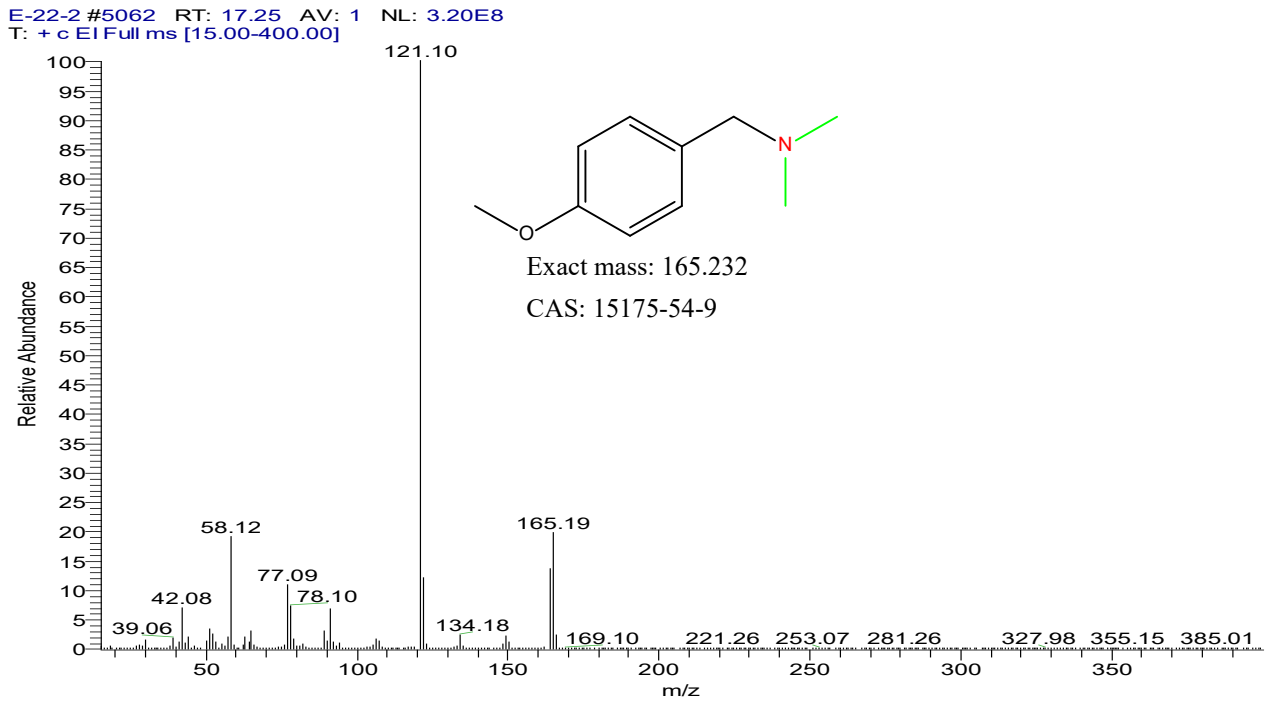

7

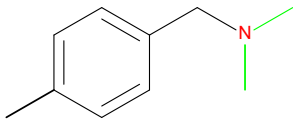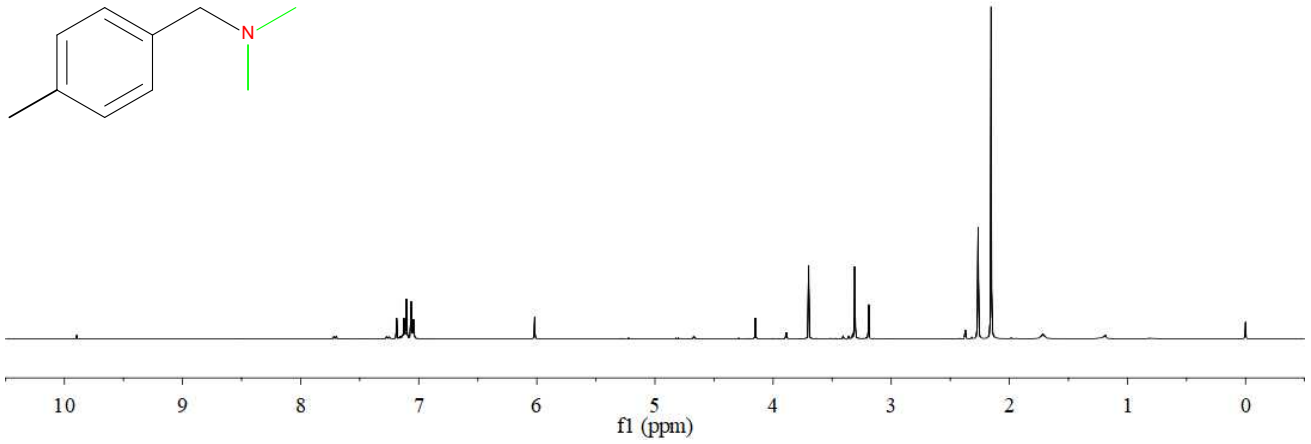

RT: 0.00 - 25.12

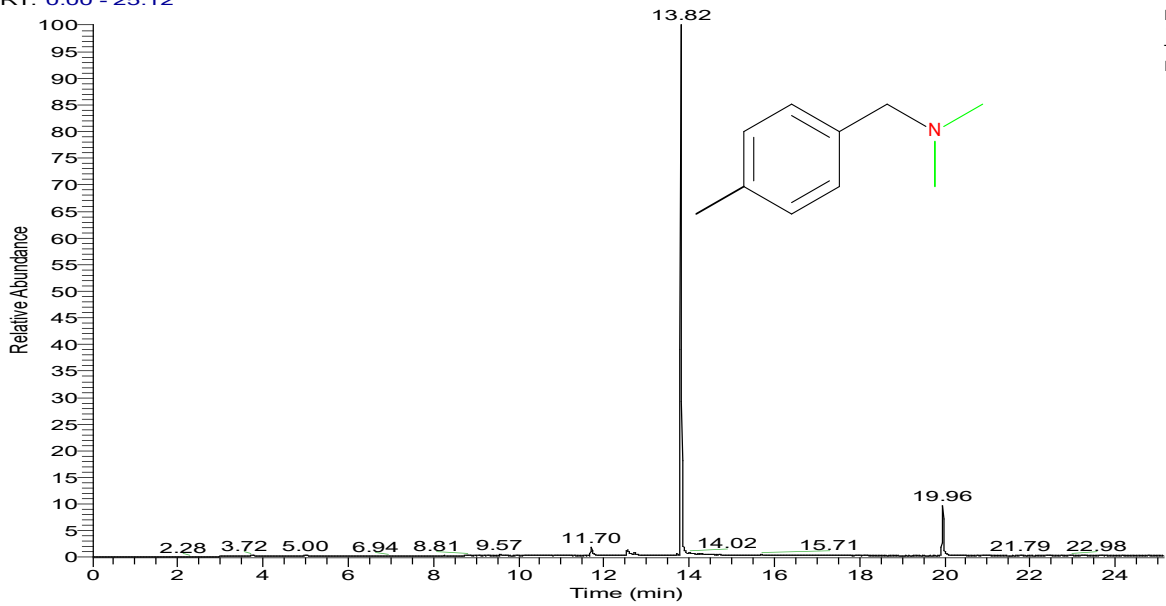

E-22-4 #4054 RT: 13.82 AV: 1 NL: 1.79E8  
T: + c EI Full ms [15.00-400.00]

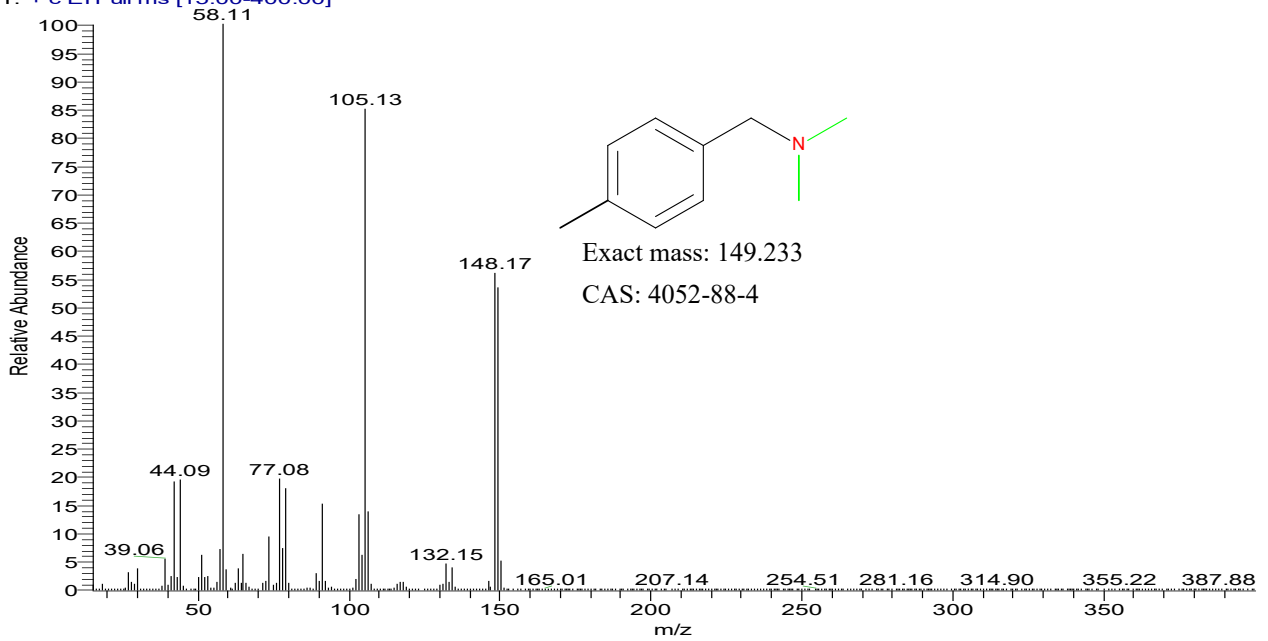

8

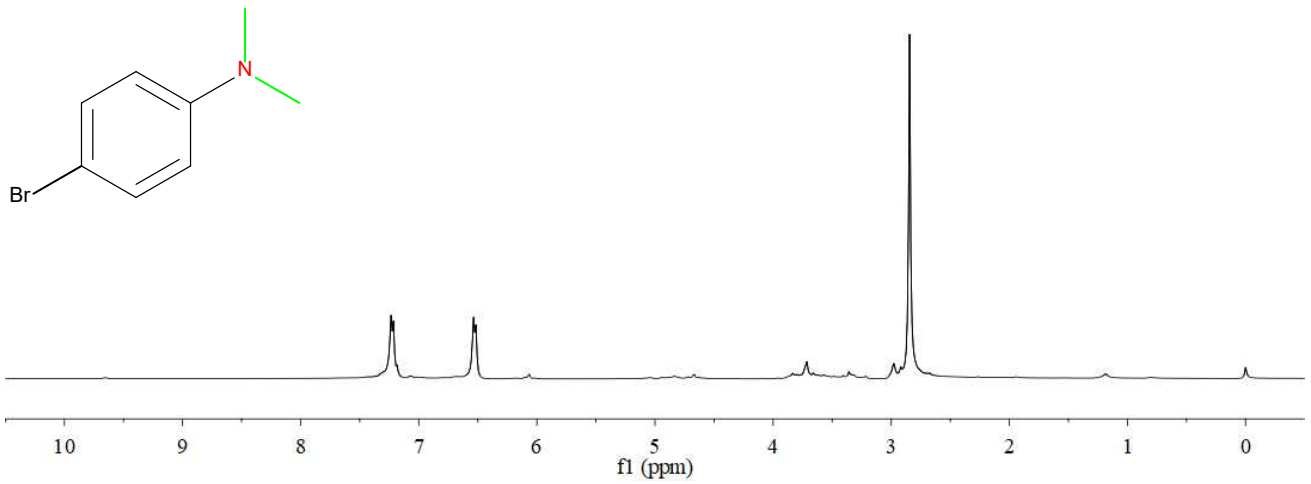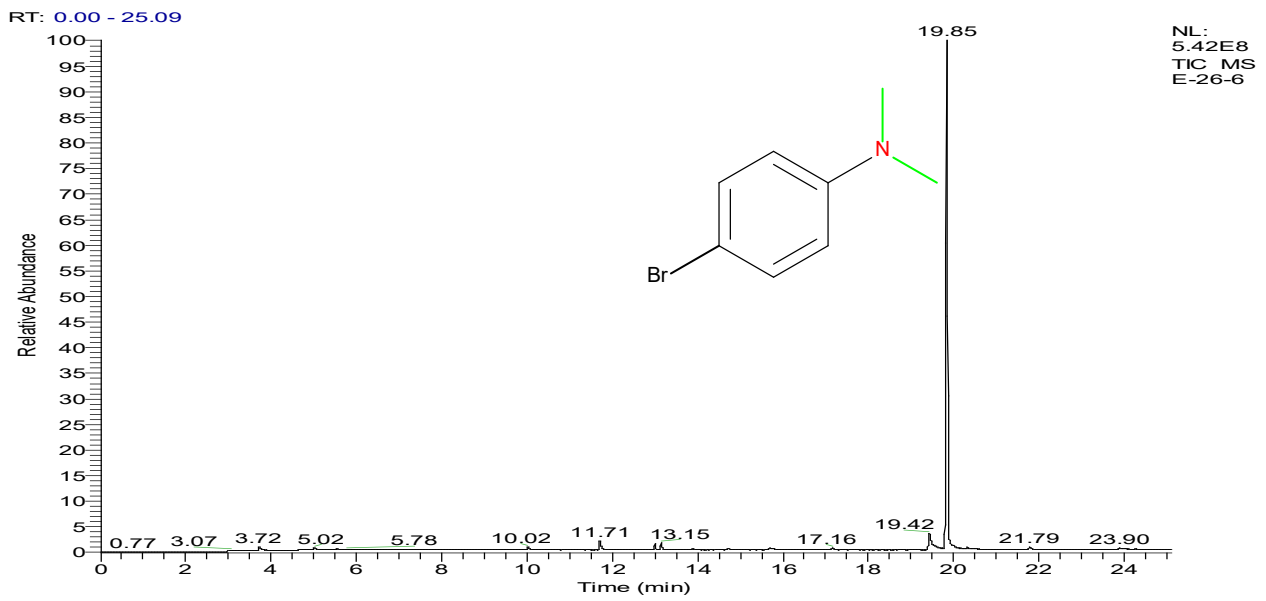

E-26-6 #5827 RT: 19.85 AV: 1 NL: 6.74E7  
T: + c EI Full ms [15.00-400.00]

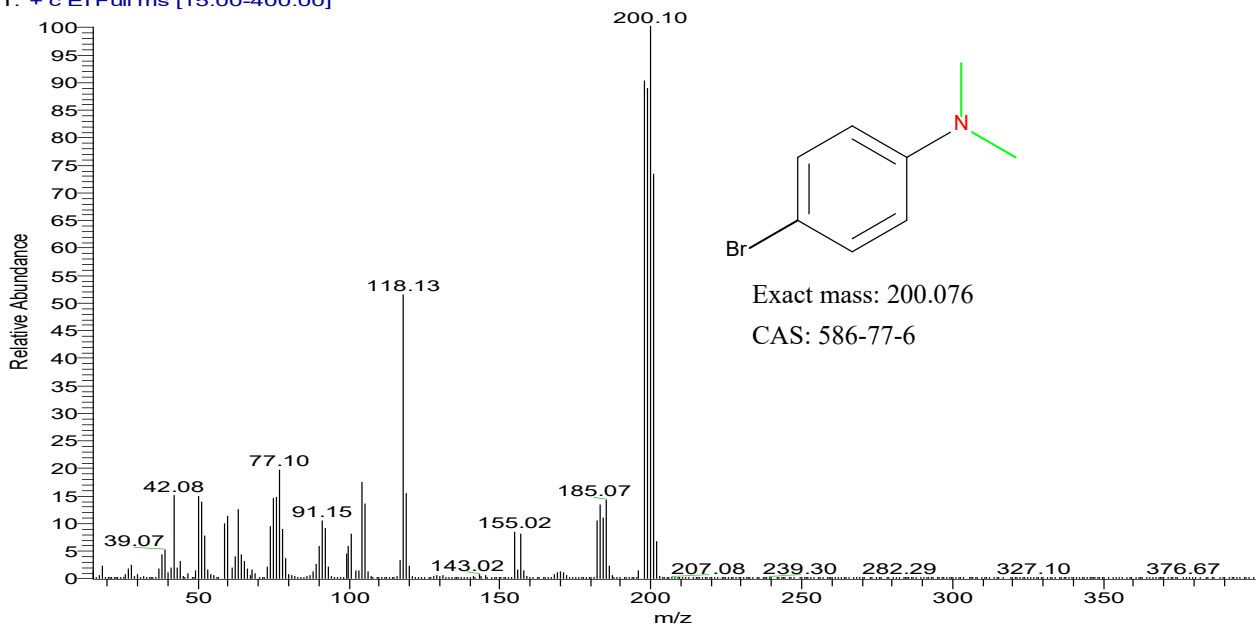

9

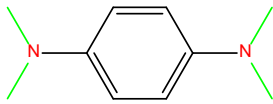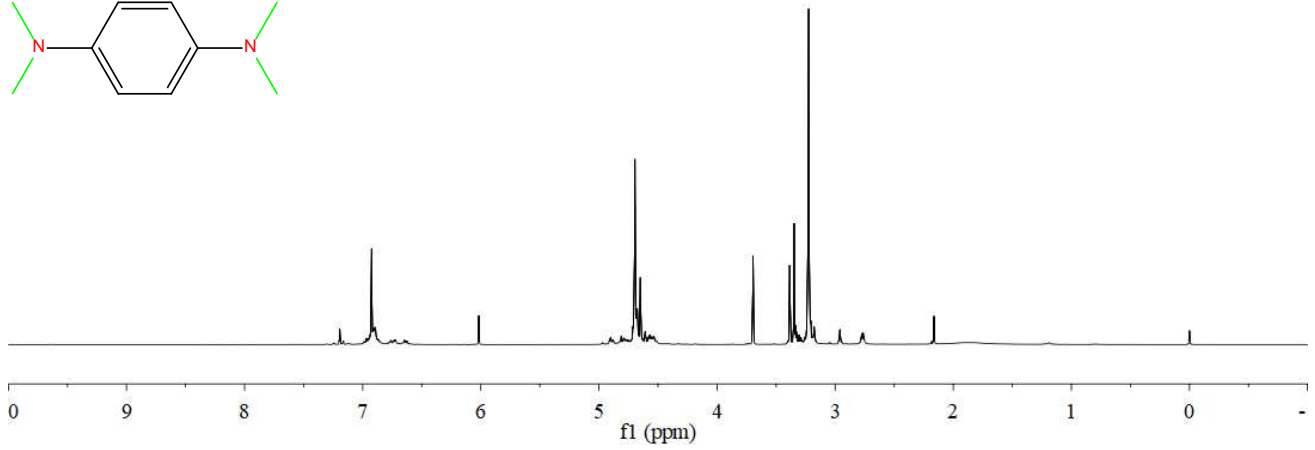

RT: 0.00 - 25.10

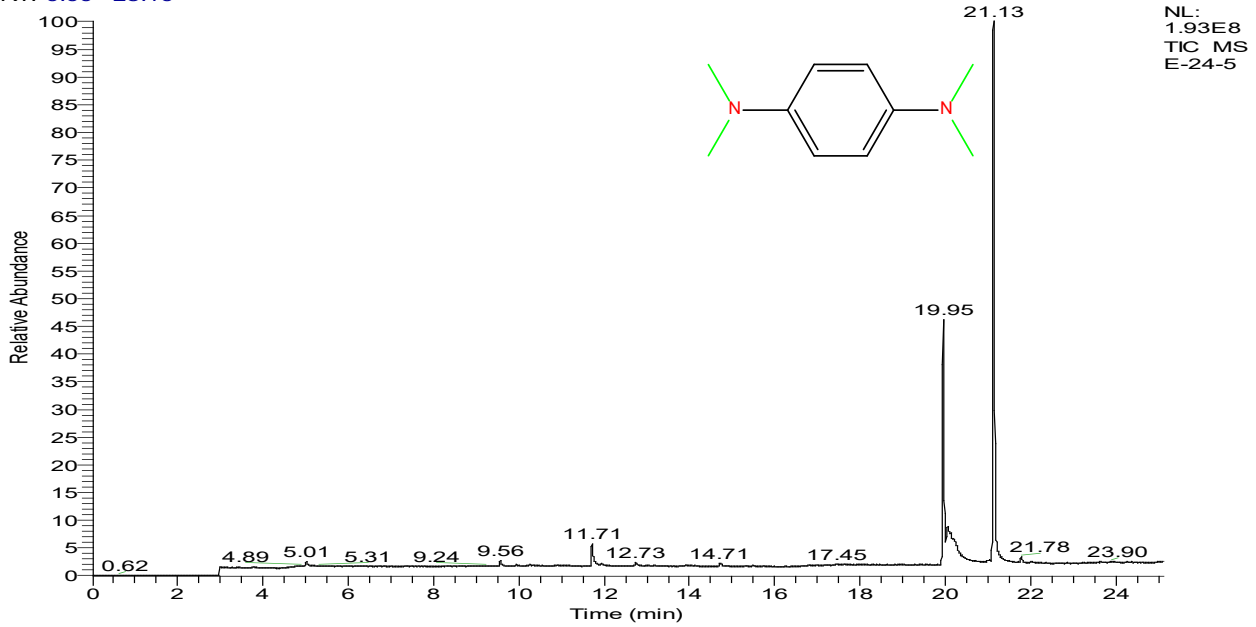

E-24-5 #6204 RT: 21.13 AV: 1 NL: 2.86E7  
T: +c EI Full ms [15.00-400.00]

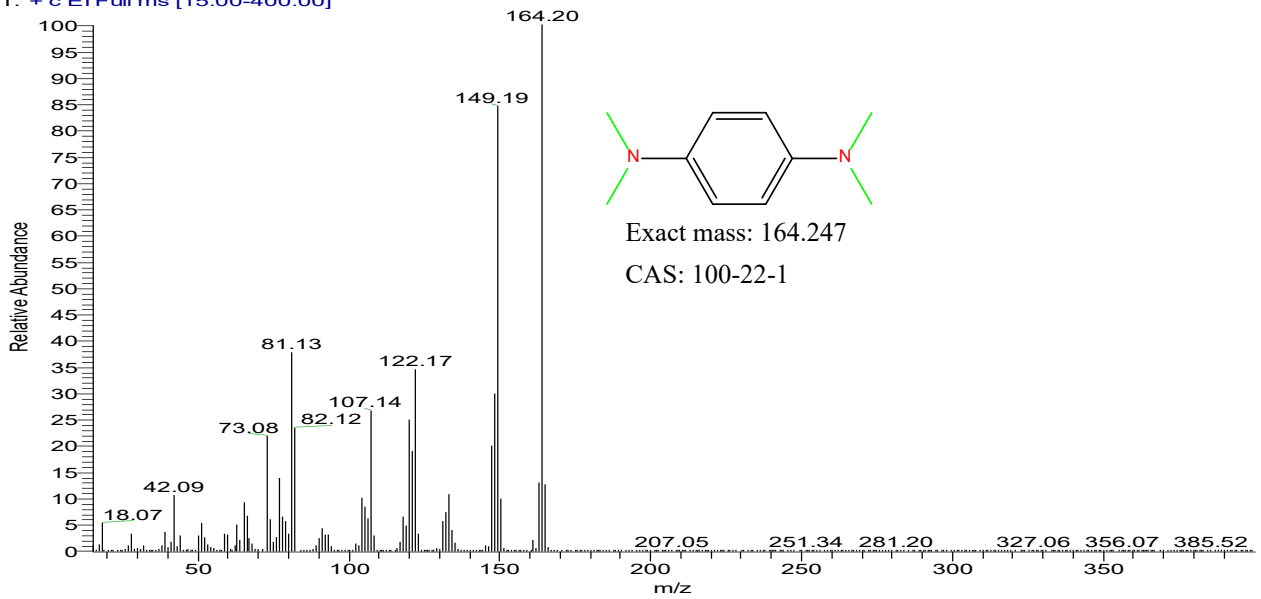

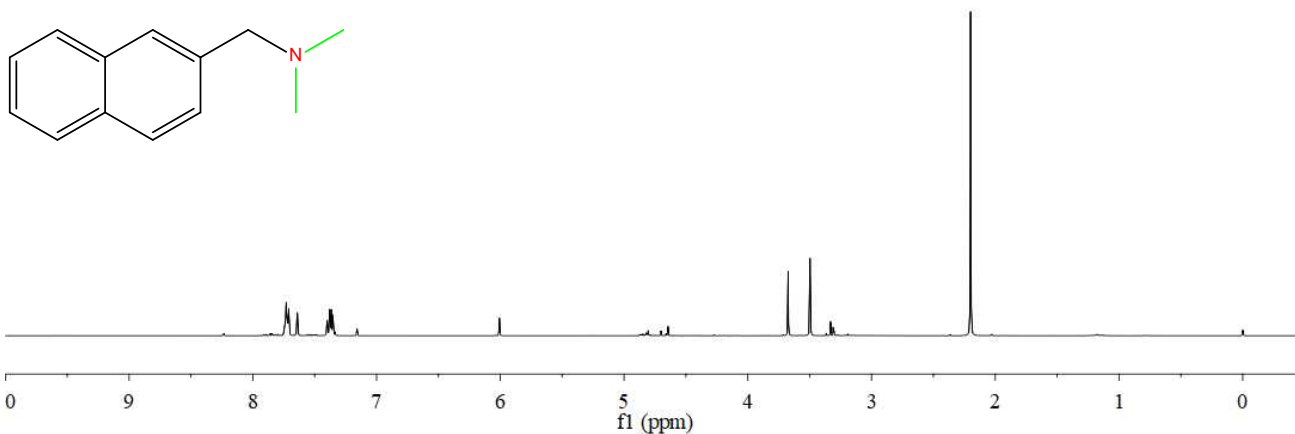

RT: 0.00 - 32.09

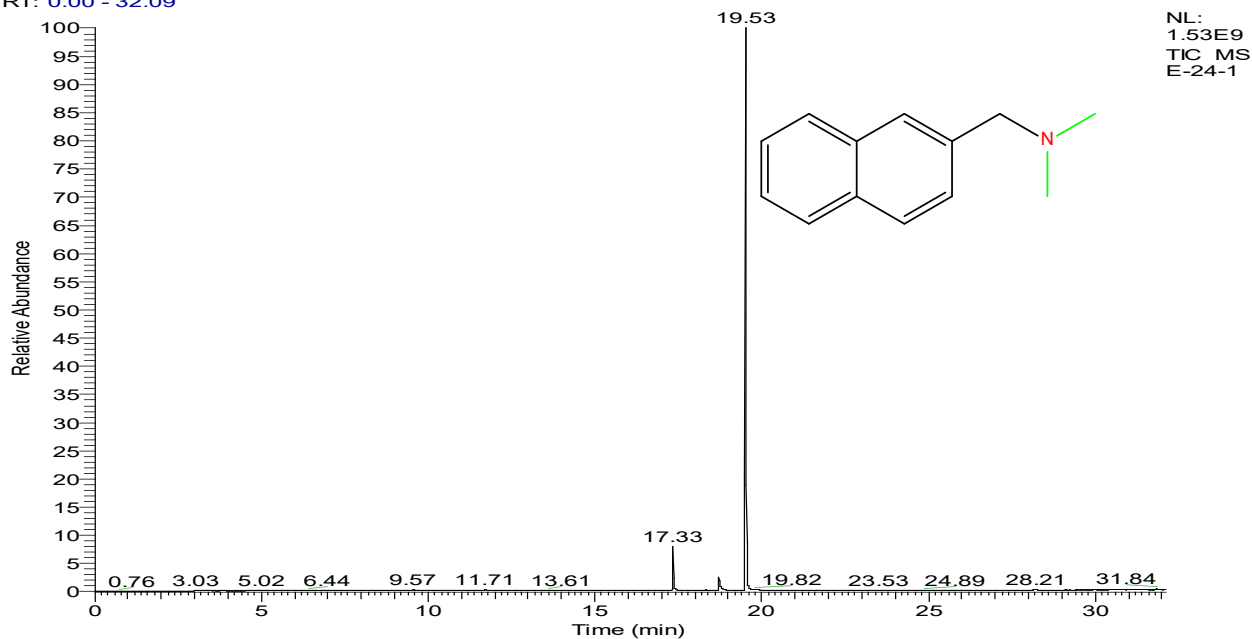

E-24-1 #5732 RT: 19.53 AV: 1 NL: 2.44E8  
T: + c EI Full ms [10.00-400.00]

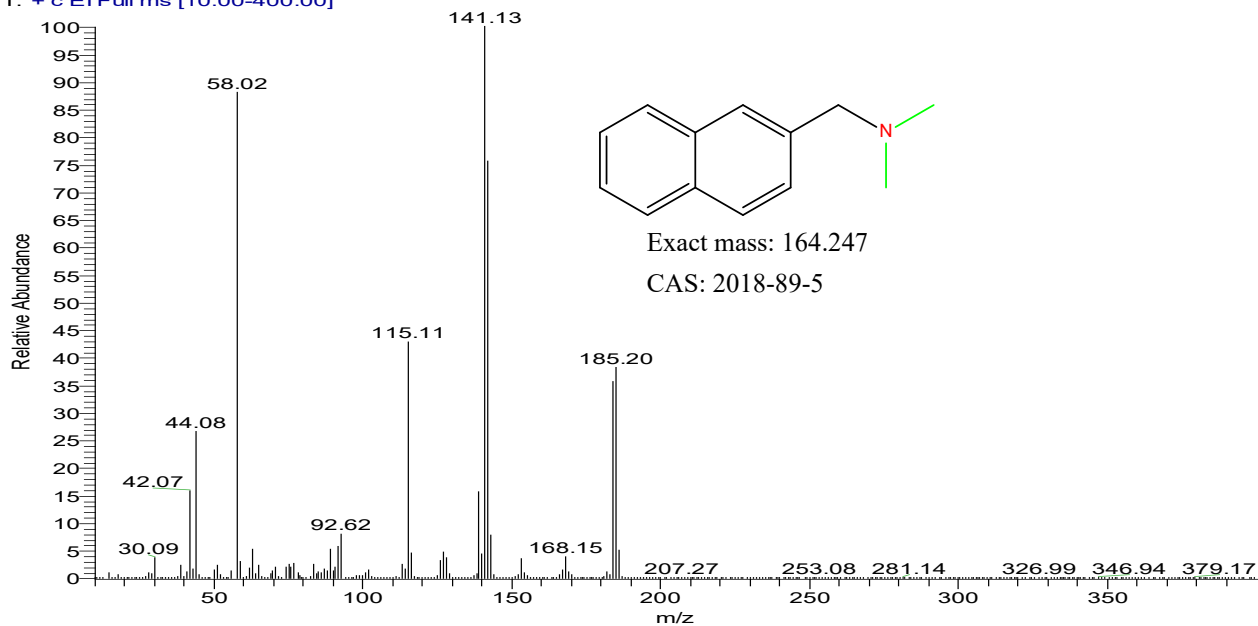



11

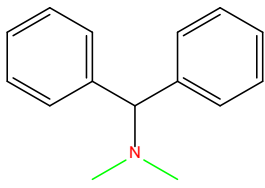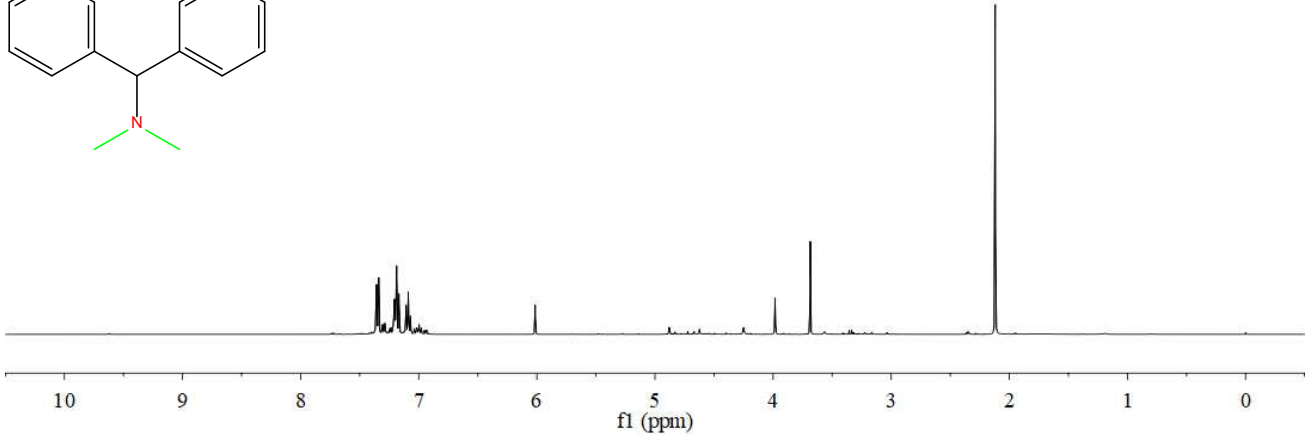

RT: 0.00 - 32.11

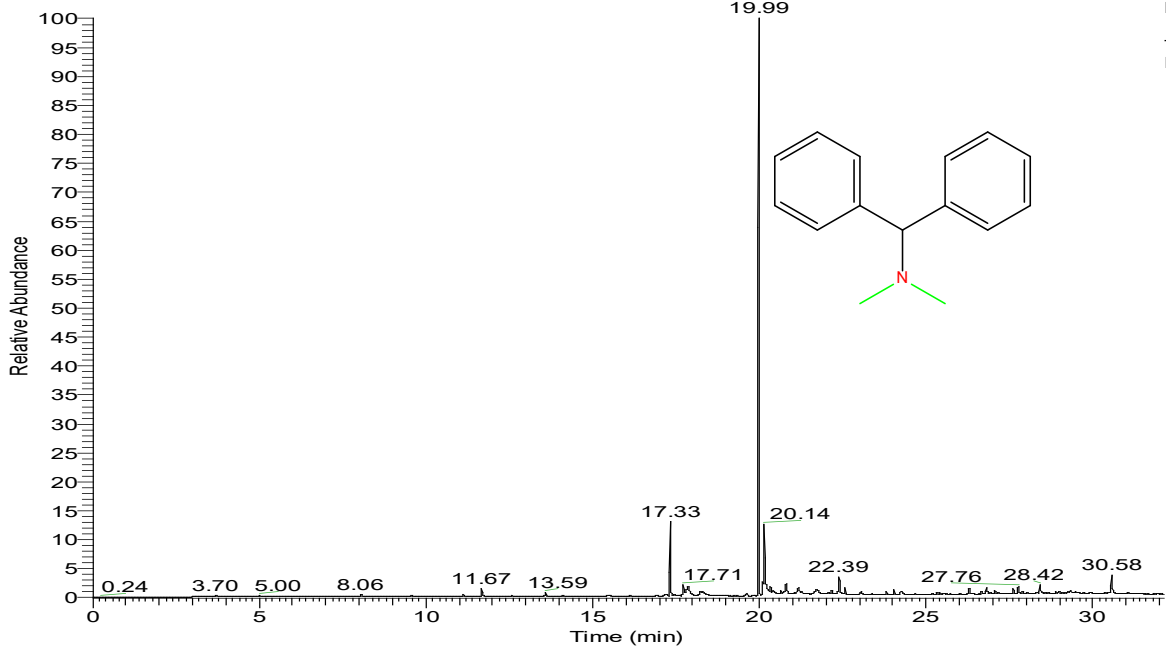

E-19-2 #5869 RT: 19.99 AV: 1 NL: 3.58E8  
T: + c EI Full ms [10.00-400.00]

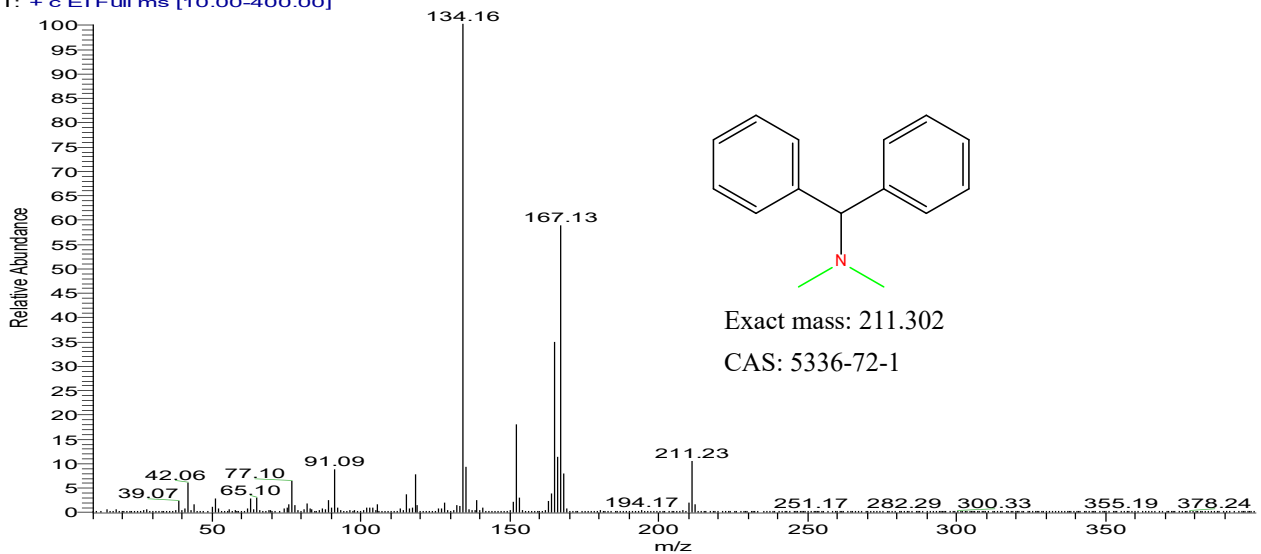

12

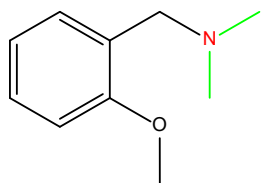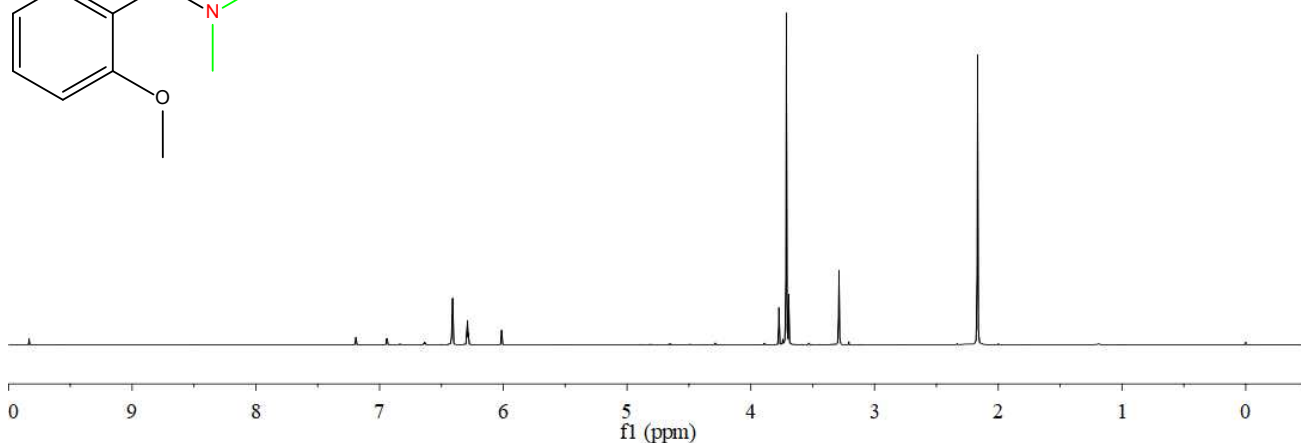

RT: 0.00 - 25.13

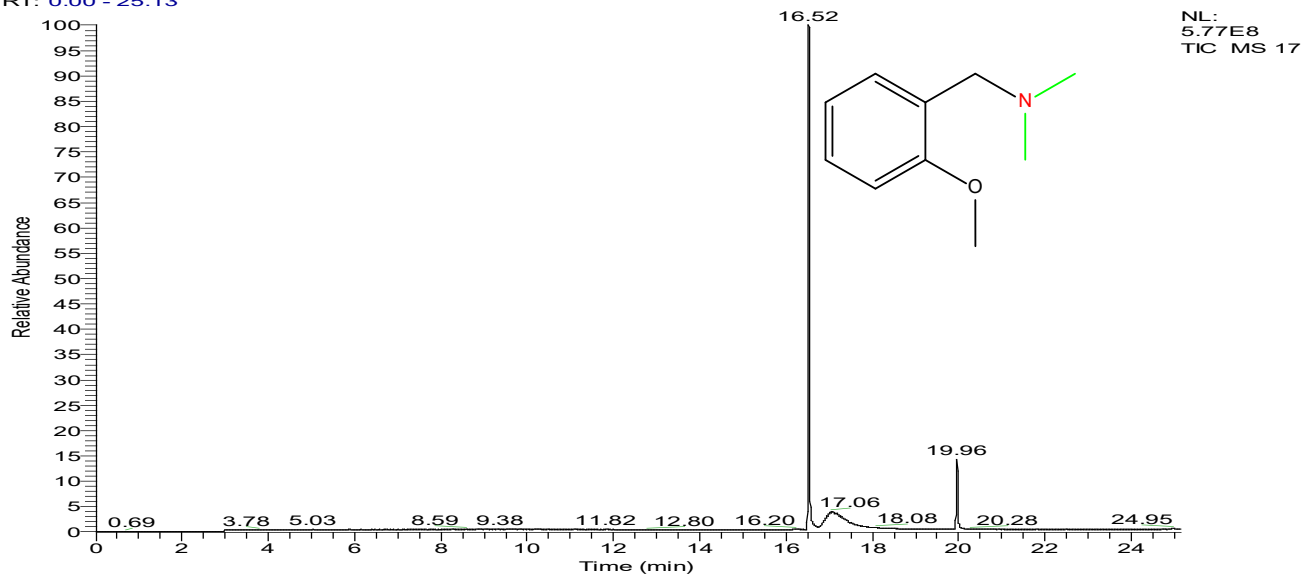

17 #4847 RT: 16.52 AV: 1 NL: 8.21E7  
T: + c EI Full ms [15.00-400.00]

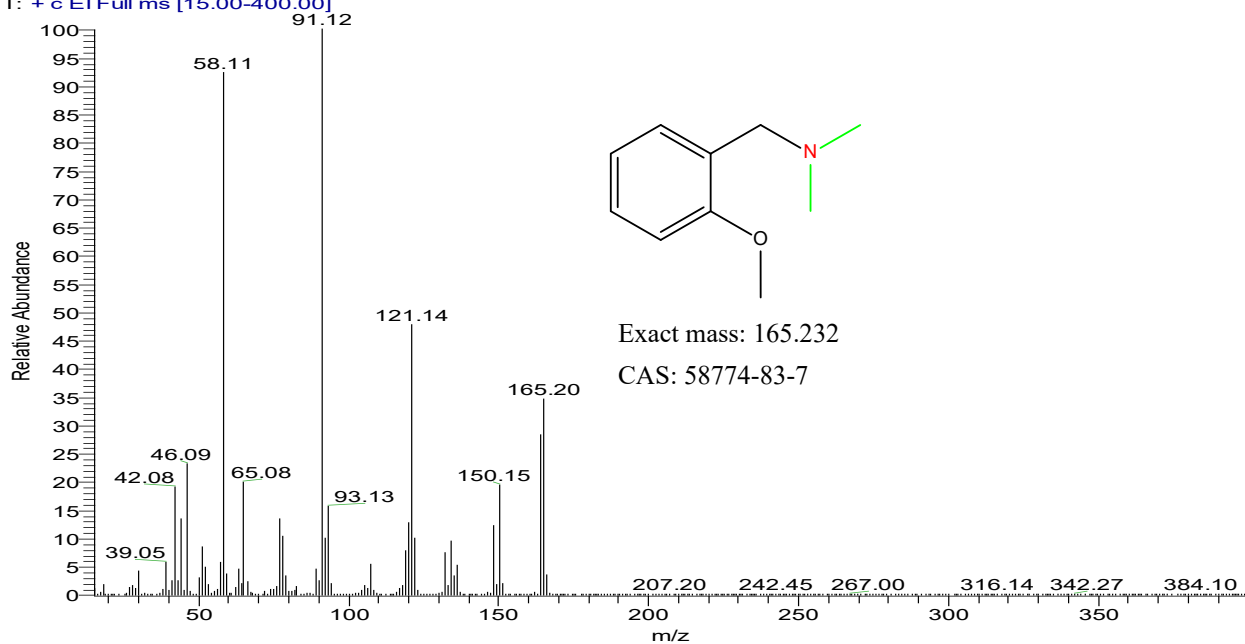

13

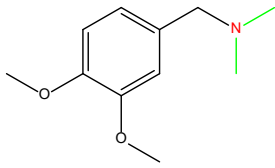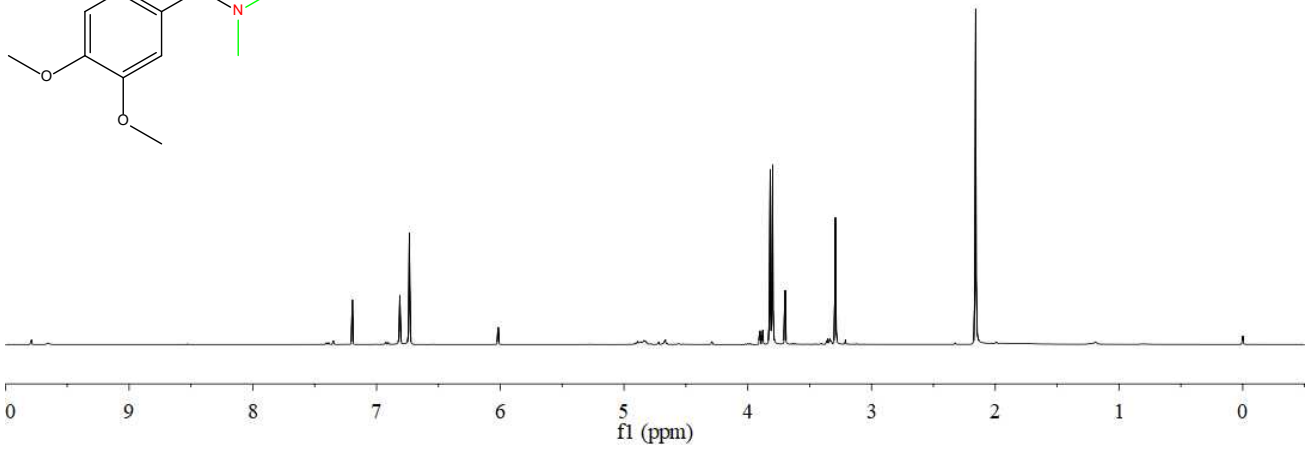

RT: 0.00 - 25.11

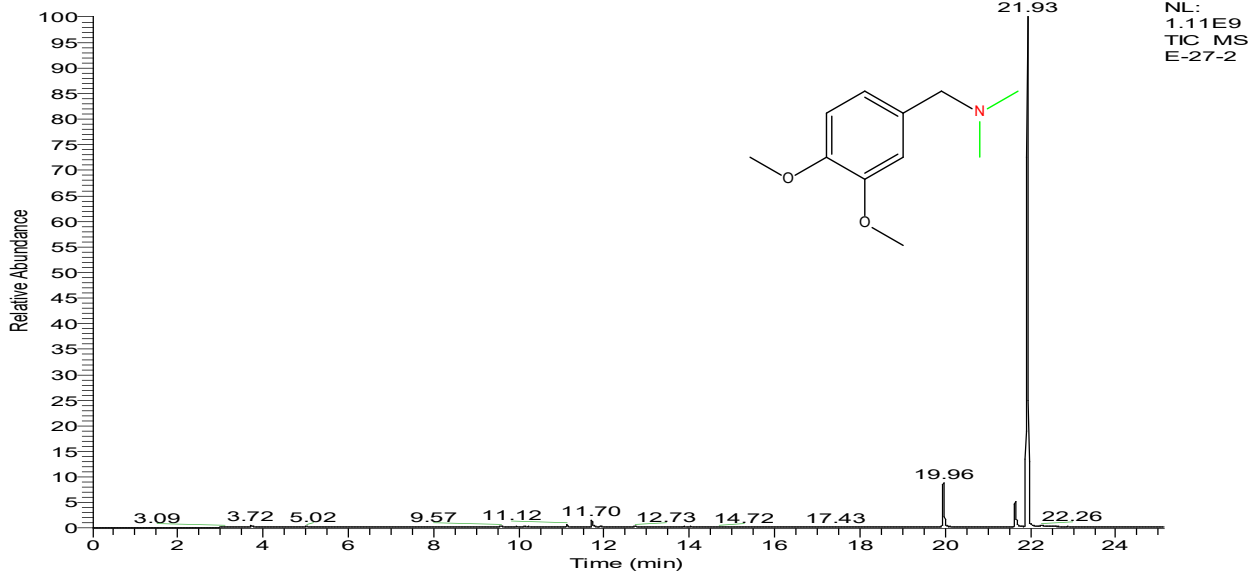

E-27-2 #6438 RT: 21.93 AV: 1 NL: 2.96E8  
T: + c EI Full ms [15.00-400.00]

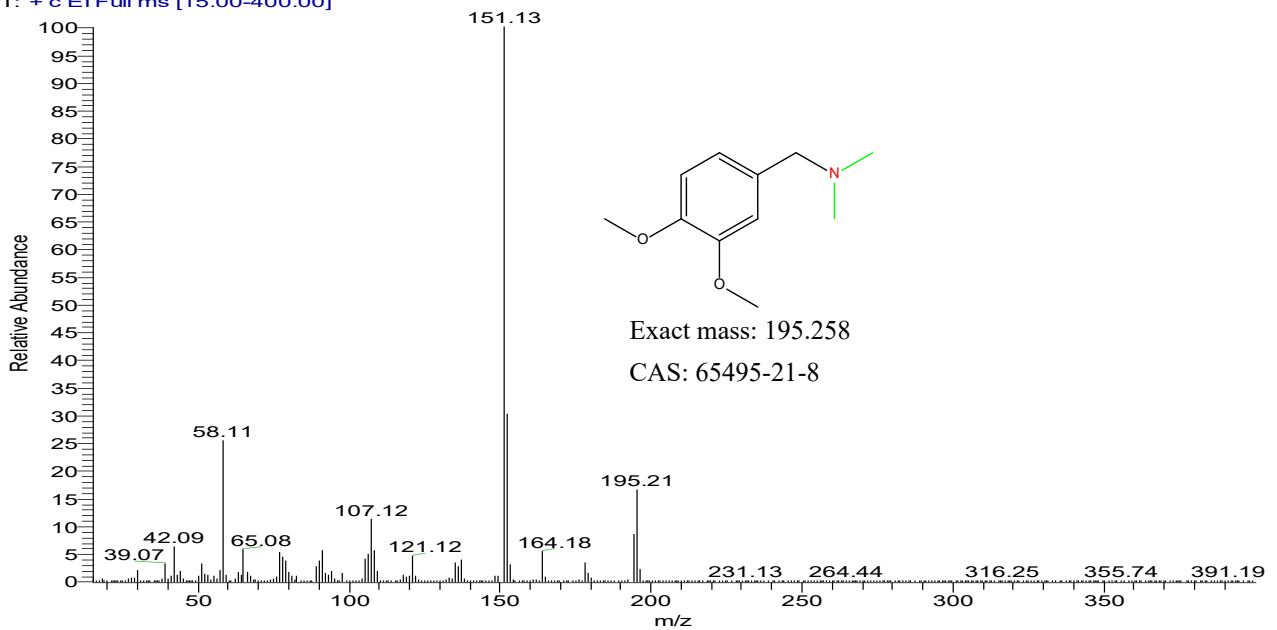

14

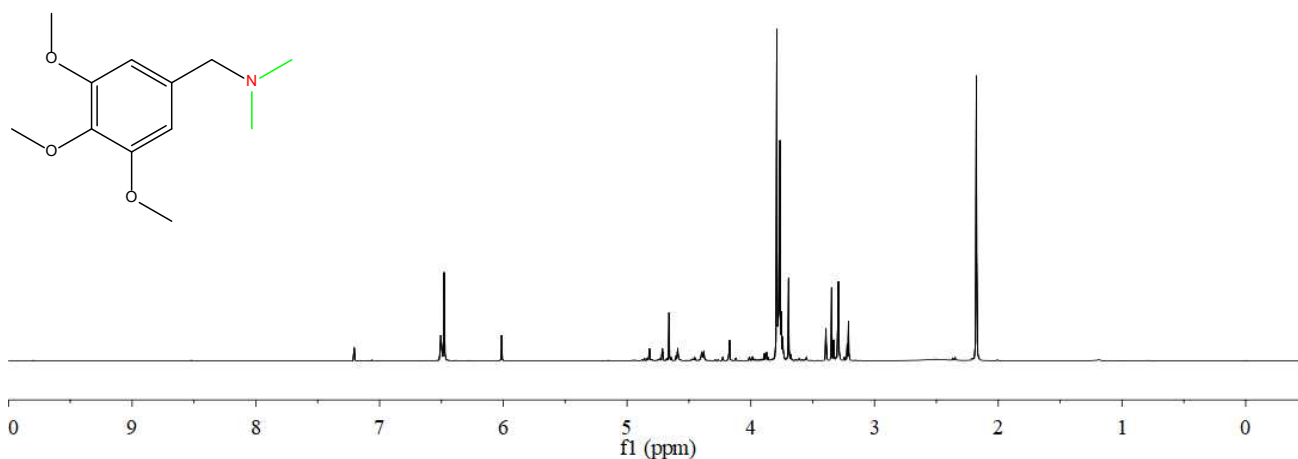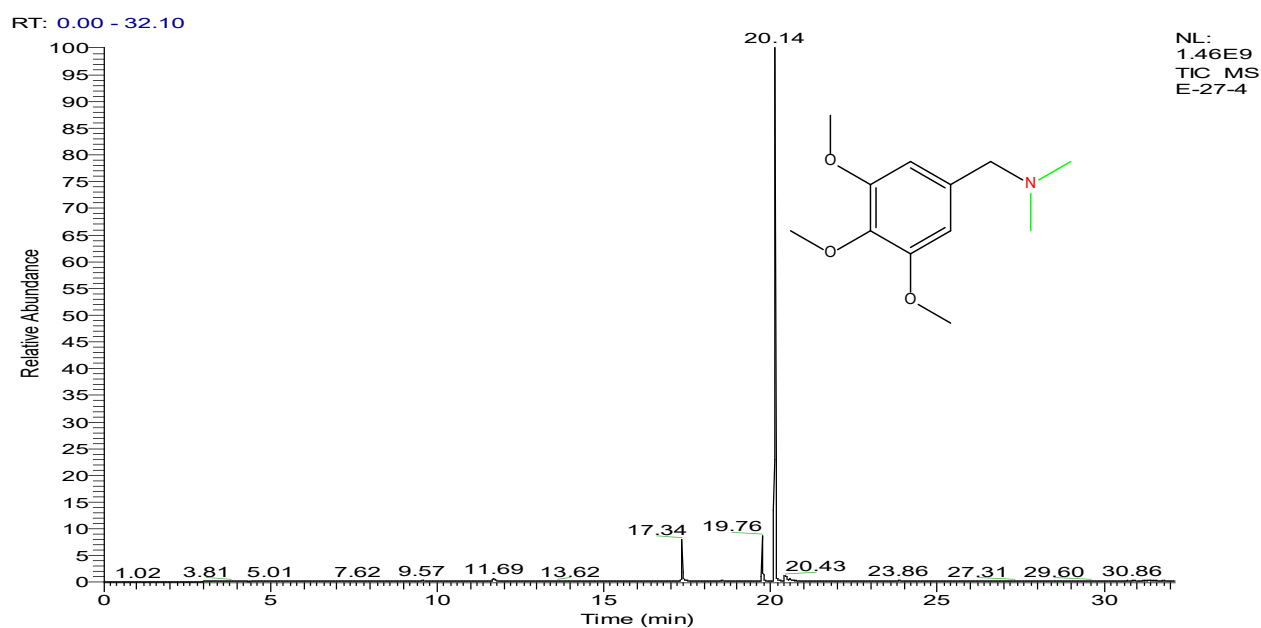

E-27-4 #5912 RT: 20.14 AV: 1 NL: 2.69E8  
T: + c EI Full ms [10.00-400.00]

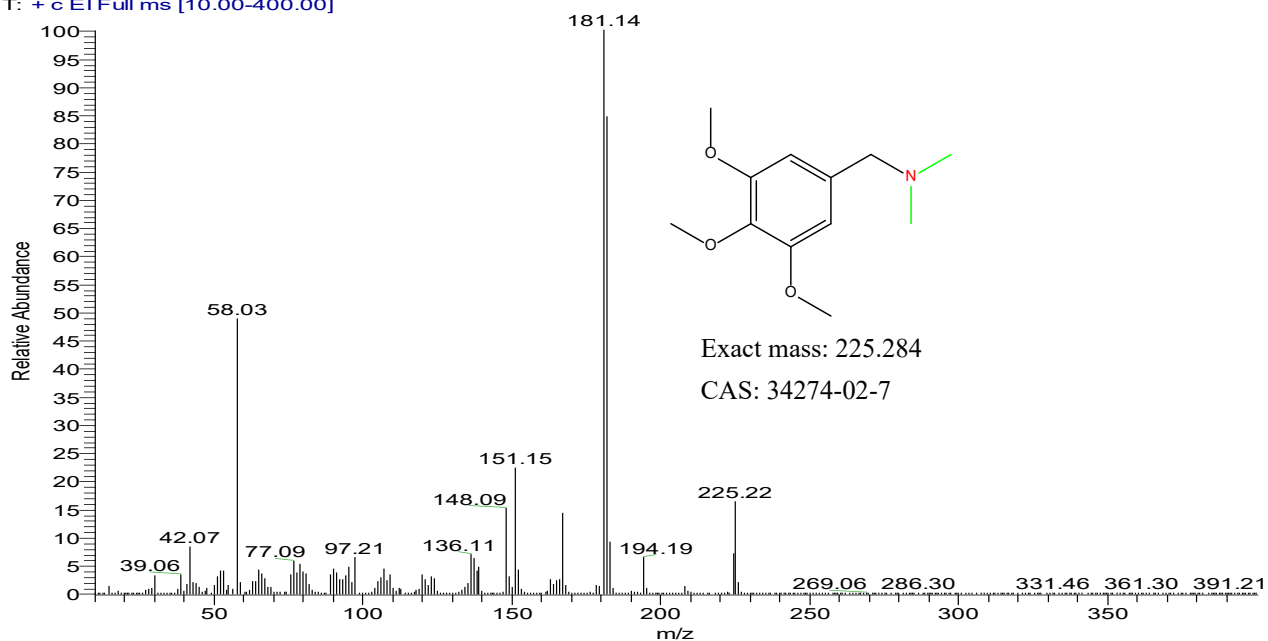

15

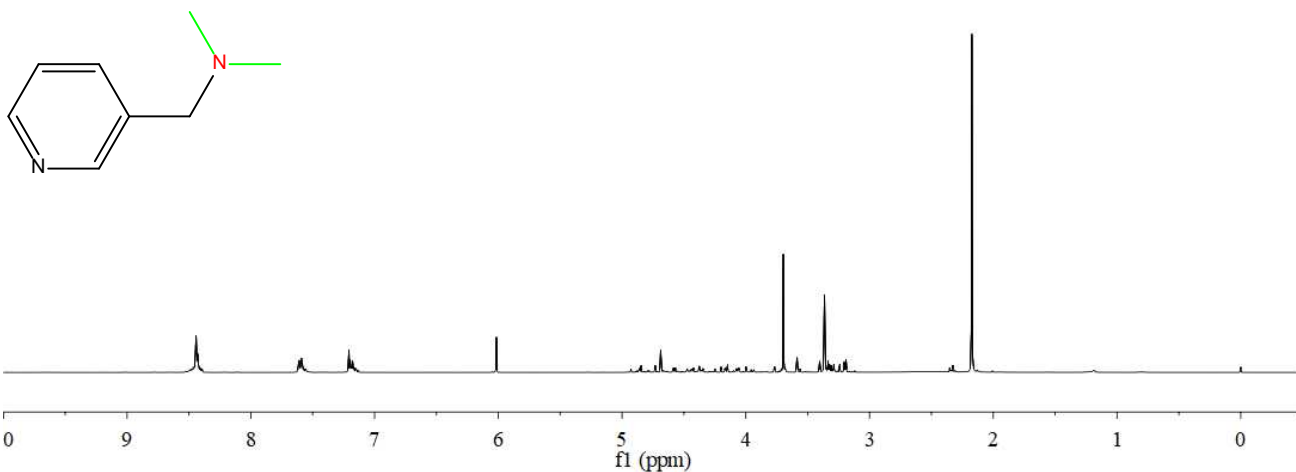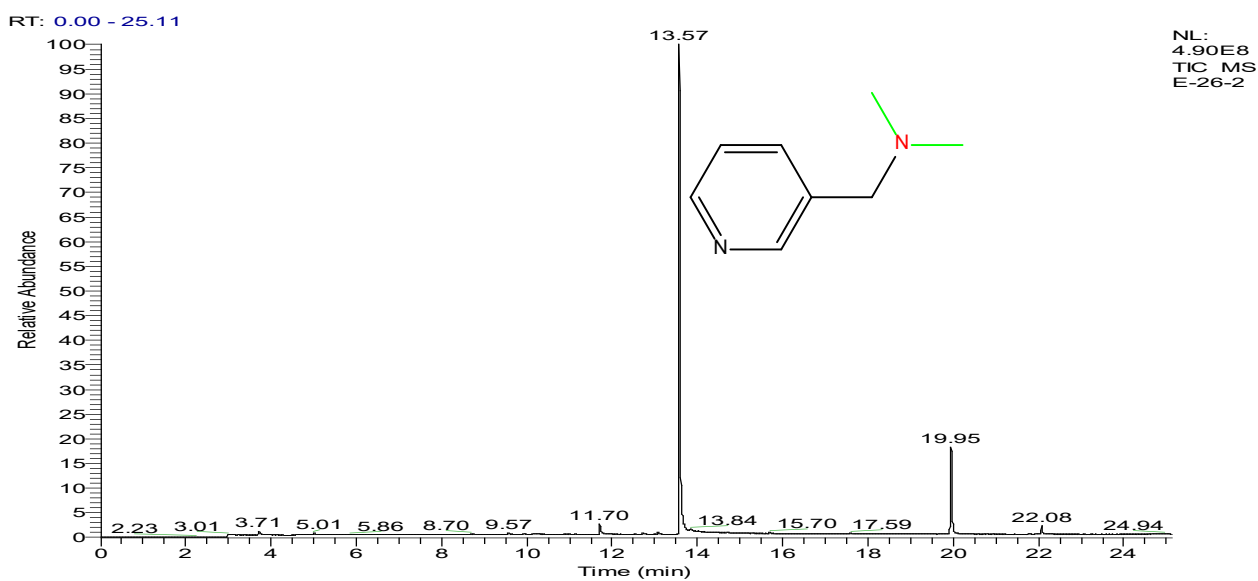

E-26-2 #3982 RT: 13.57 AV: 1 NL: 1.92E8  
T: + c EI Full ms [15.00-400.00]

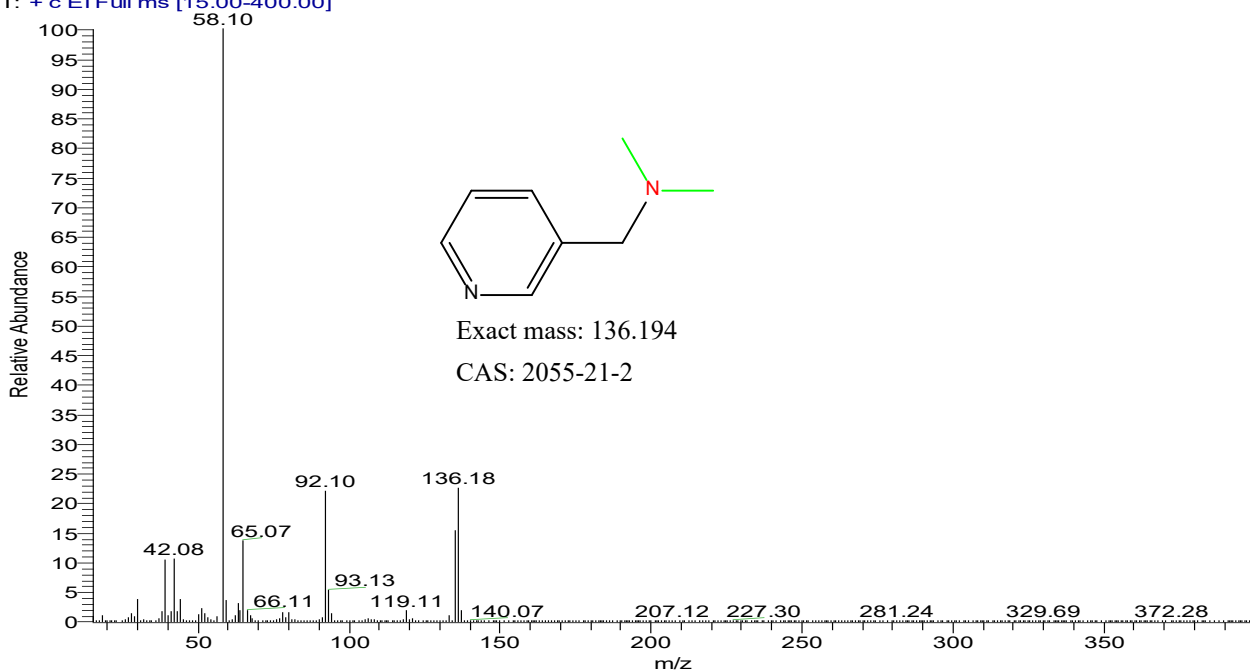

16

RT: 0.00 - 25.11

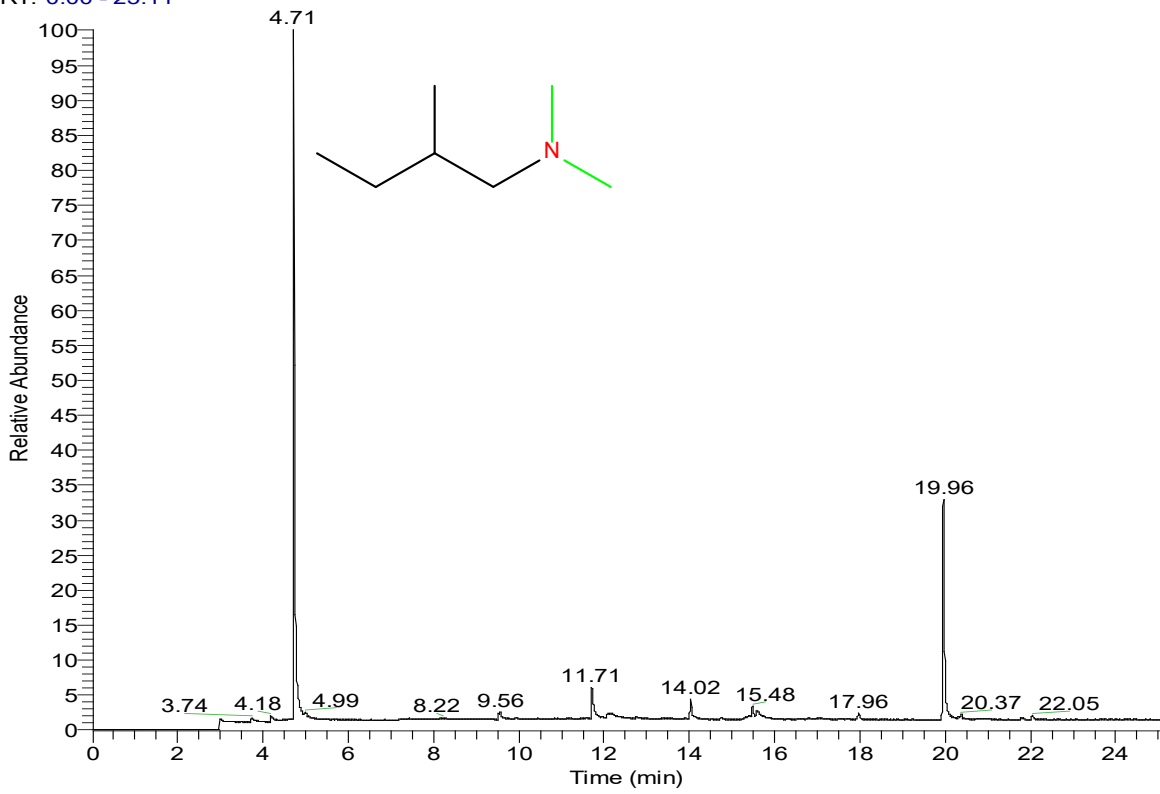

NL:  
2.33E8  
TIC MS  
E-19-5

E-19-5 #1375 RT: 4.71 AV: 1 NL: 1.55E8

T: + c EI Full ms [15.00-400.00]

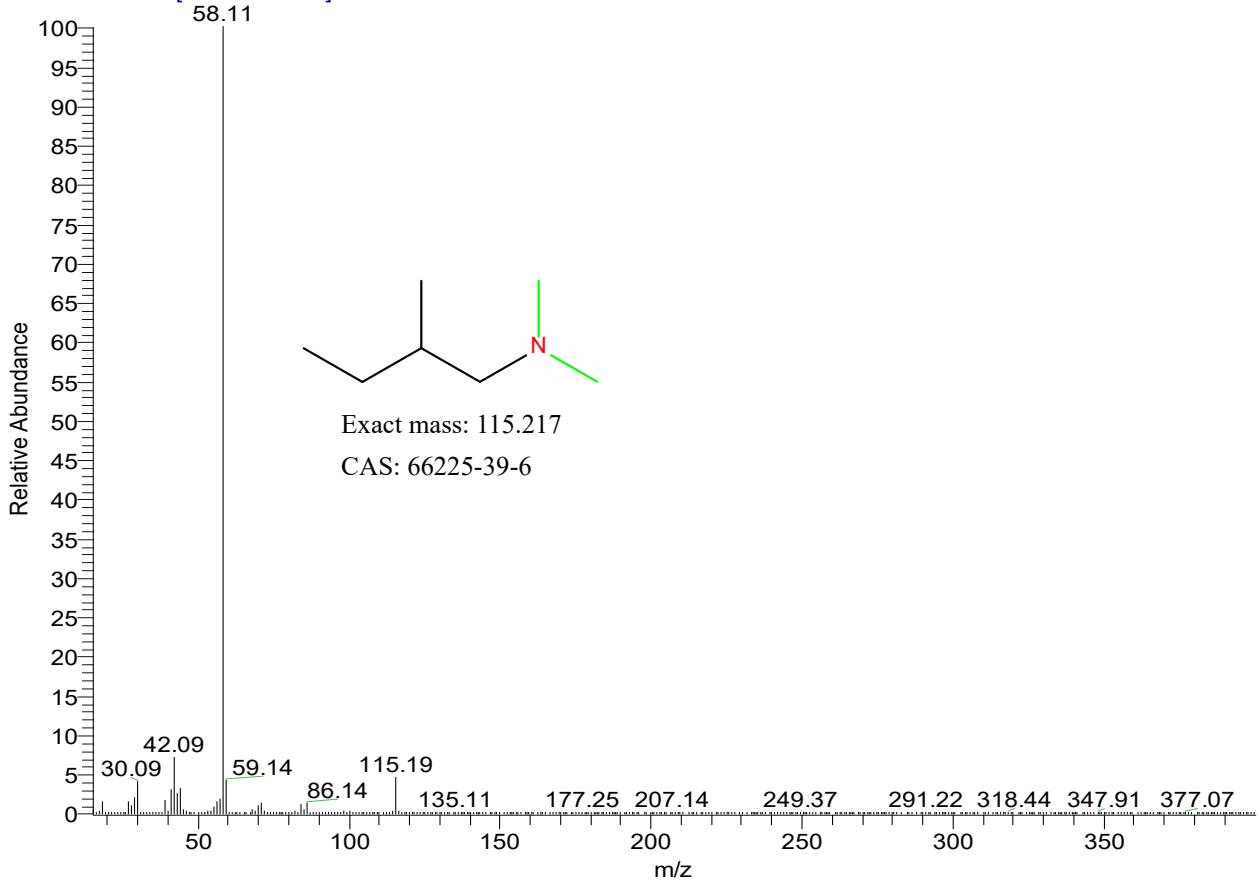

17

RT: 0.00 - 25.10

NL:  
5.00E8  
TIC MS  
E-24-2

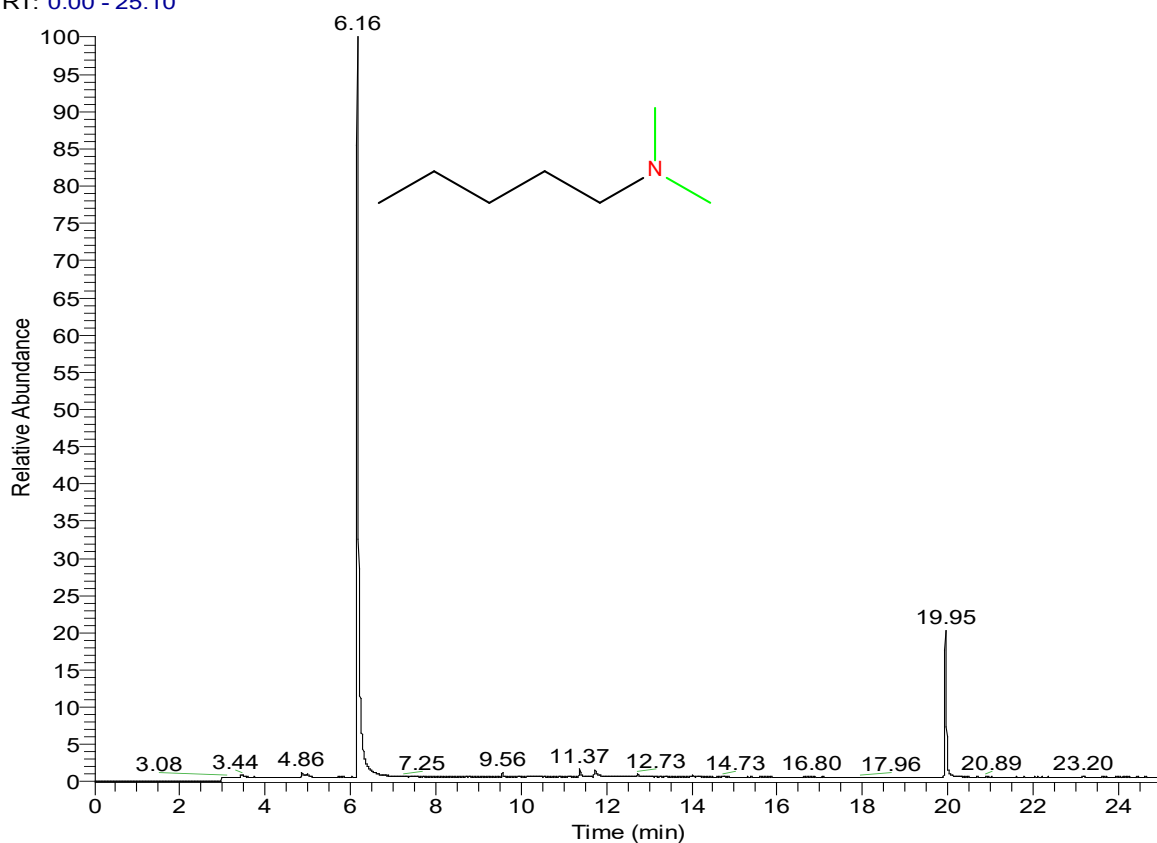

E-24-2 #1802 RT: 6.16 AV: 1 NL: 3.51E8  
T: + c EI Full ms [15.00-400.00]

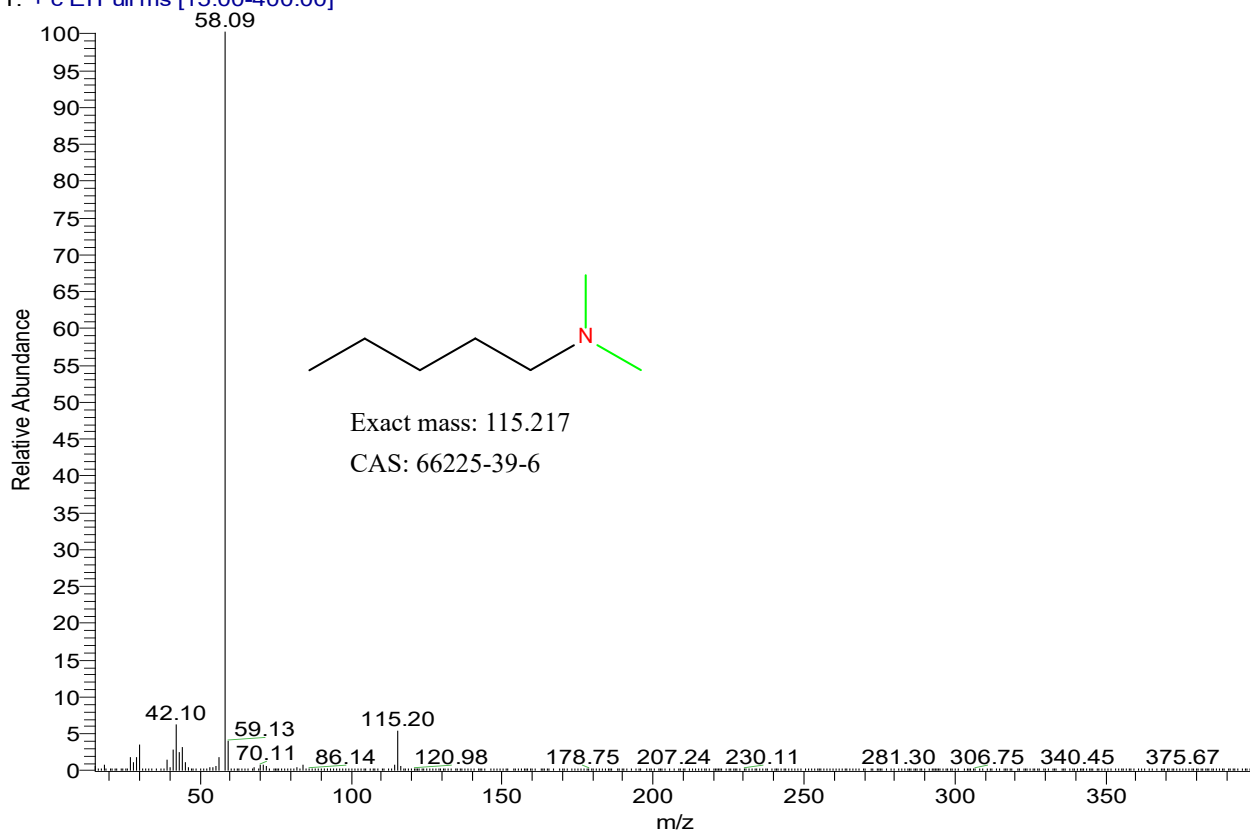

18

RT: 0.00 - 25.13

NL:  
4.44E8  
TIC MS  
E-26-1

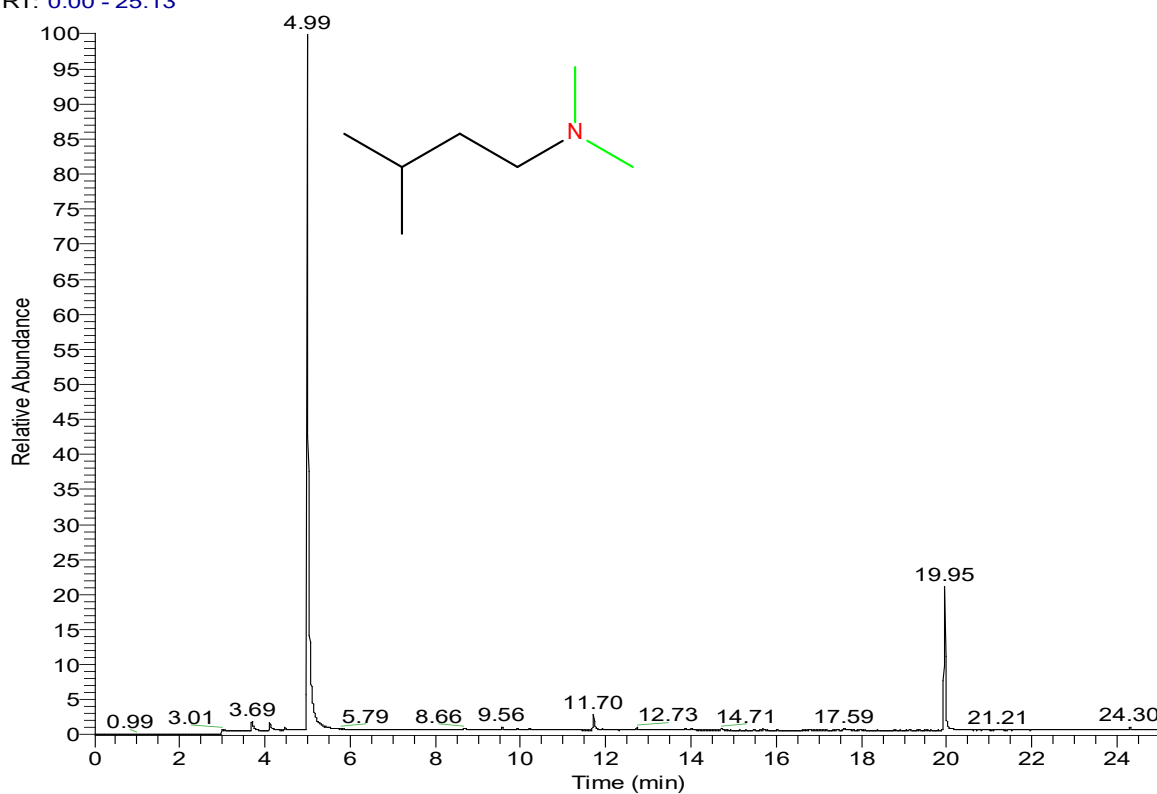

E-26-1 #1457 RT: 4.99 AV: 1 NL: 2.86E8

T: + c EI Full ms [15.00-400.00]

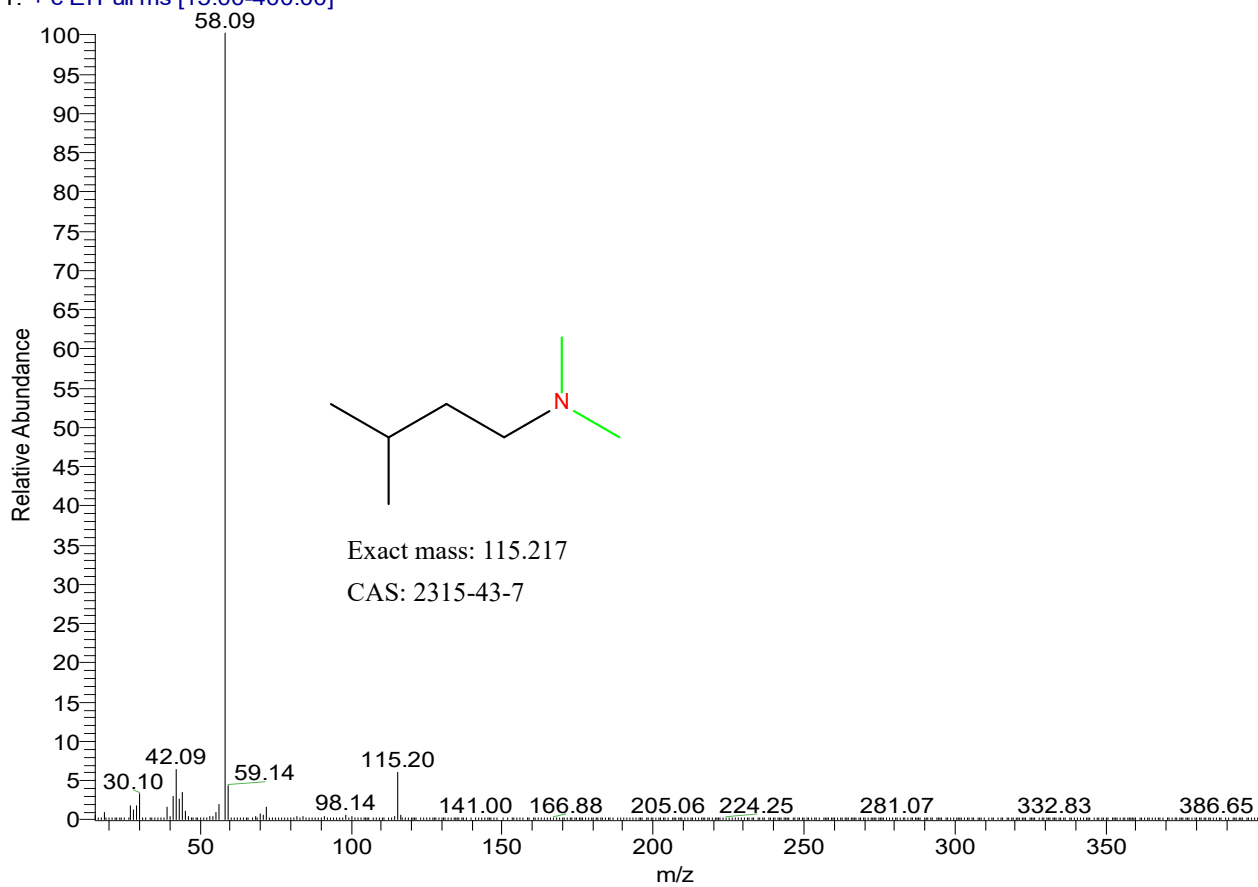



19

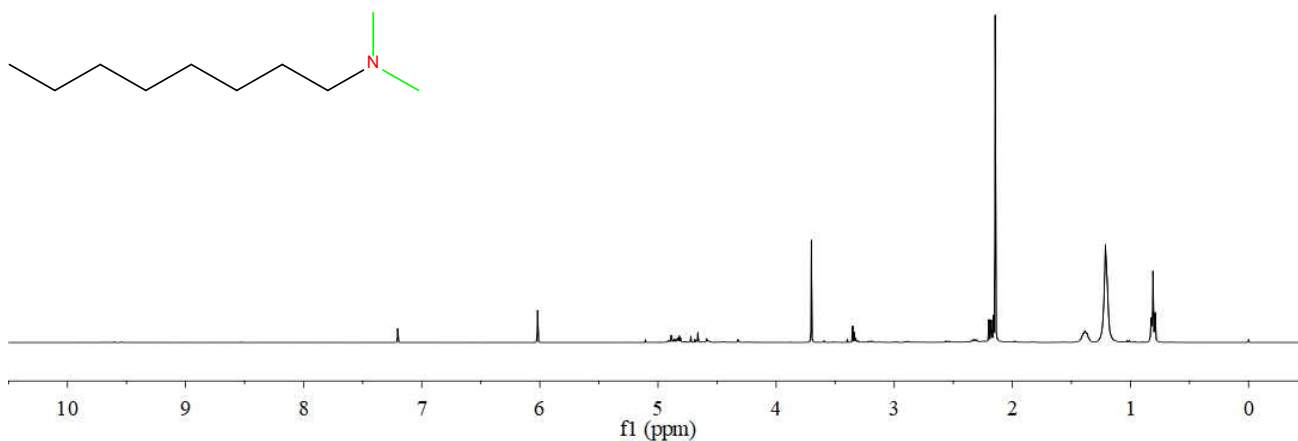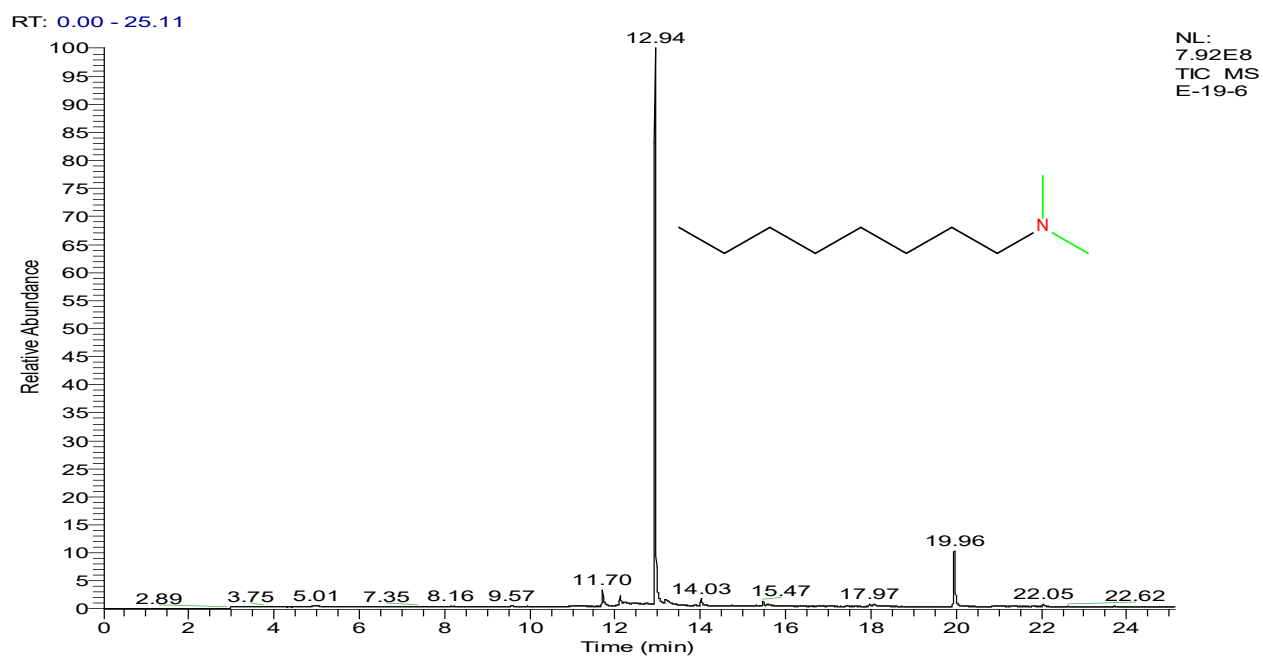

E-19-6 #3794 RT: 12.94 AV: 1 NL: 5.72E8  
T: + c EI Full ms [15.00-400.00]

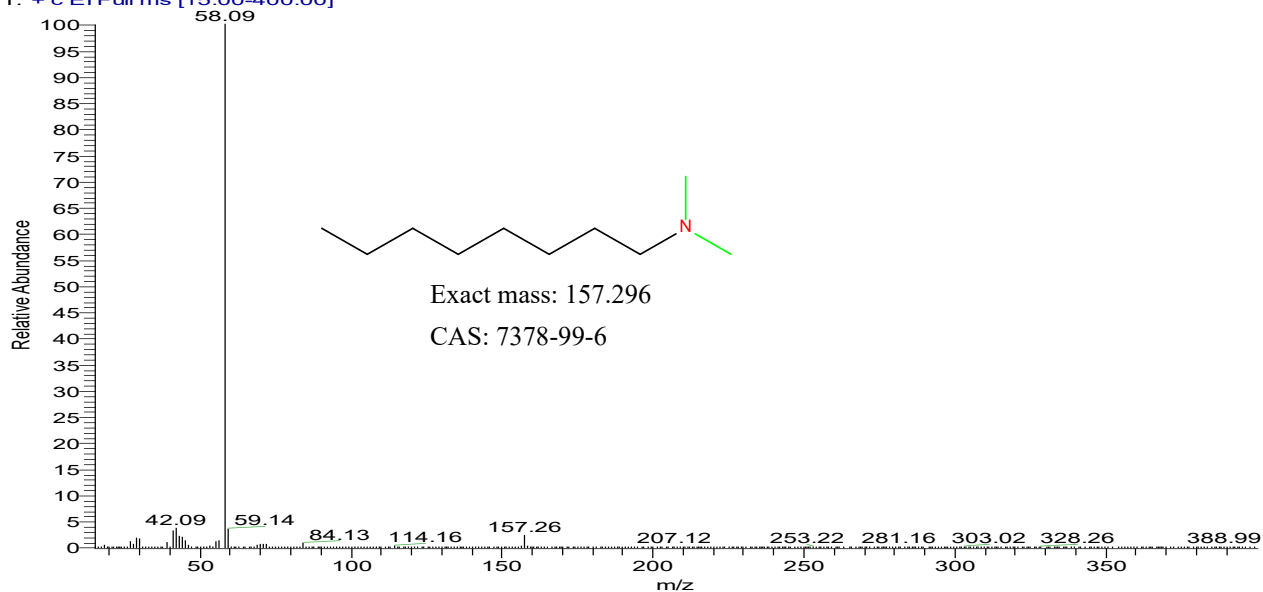

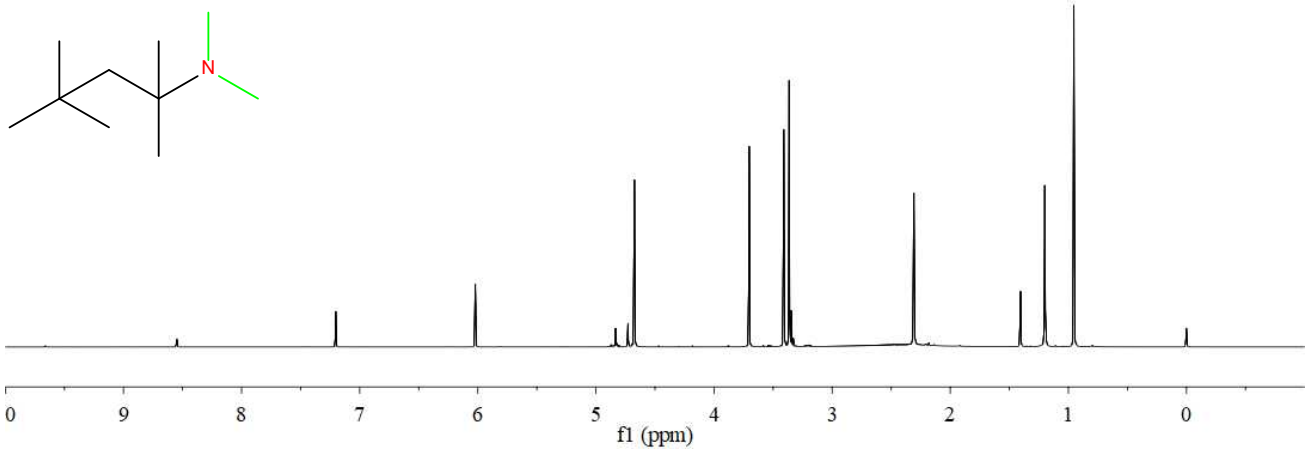

RT: 0.00 - 25.12

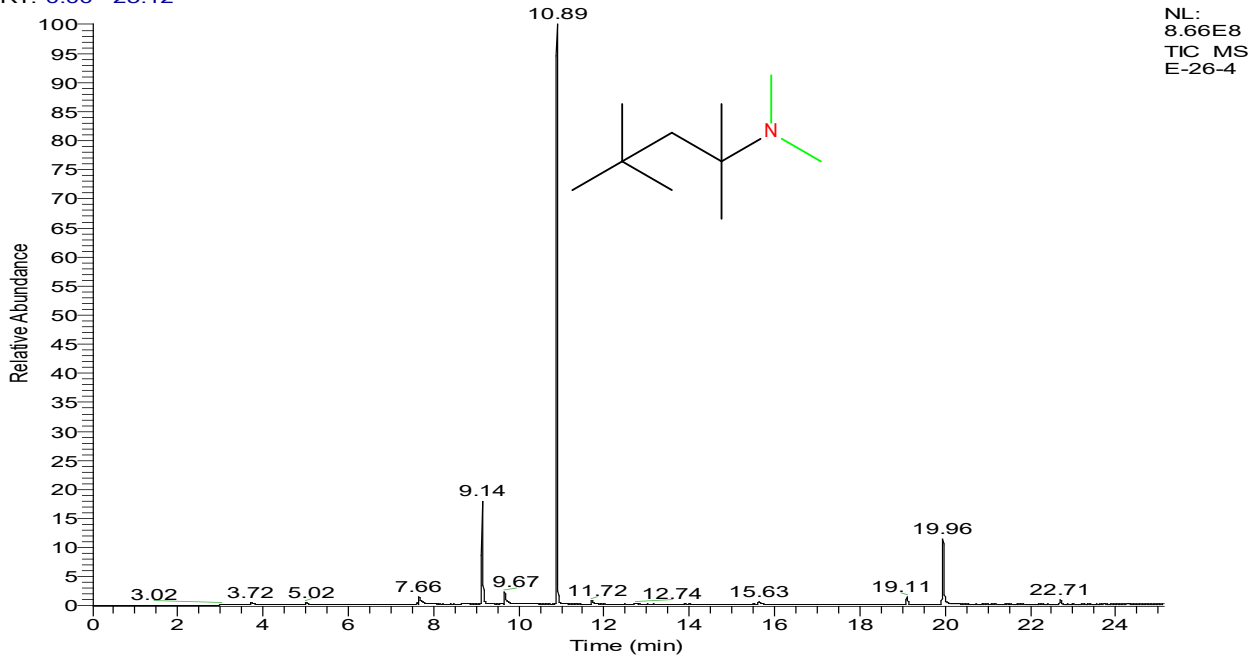

NL:  
8.66E8  
TIC MS  
E-26-4

E-26-4 #3193 RT: 10.89 AV: 1 NL: 5.06E8  
T: + c EI Full ms [15.00-400.00]

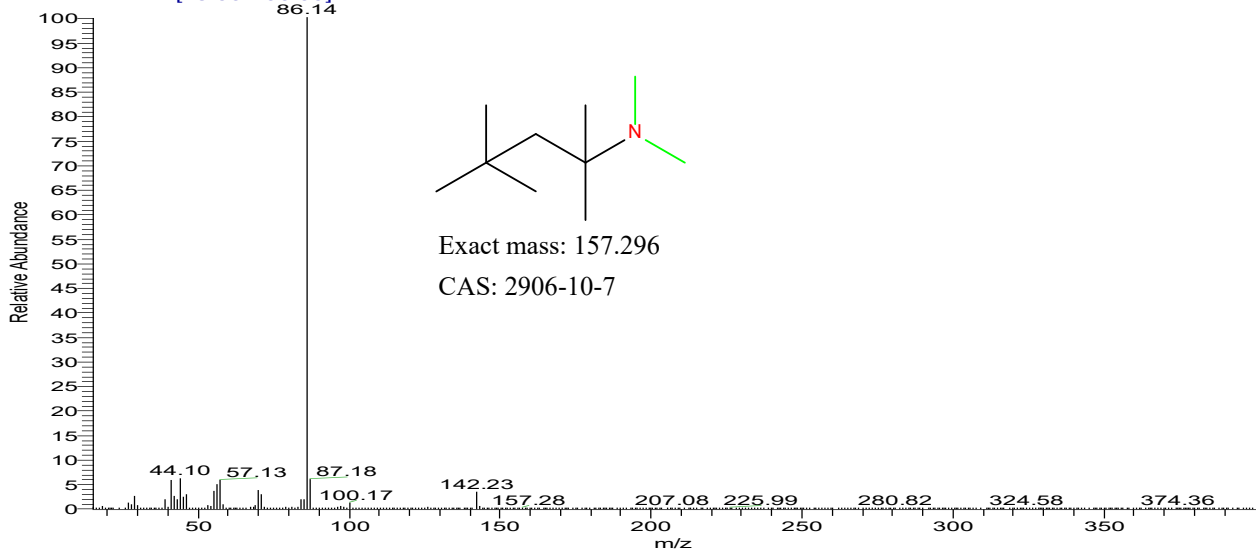

Exact mass: 157.296  
CAS: 2906-10-7

21

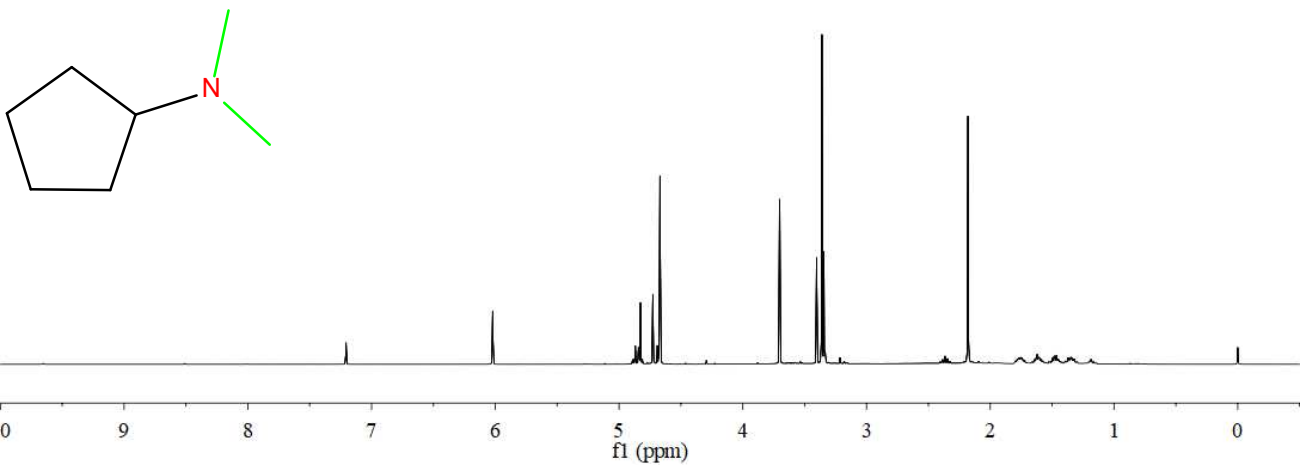

RT: 0.00 - 25.09

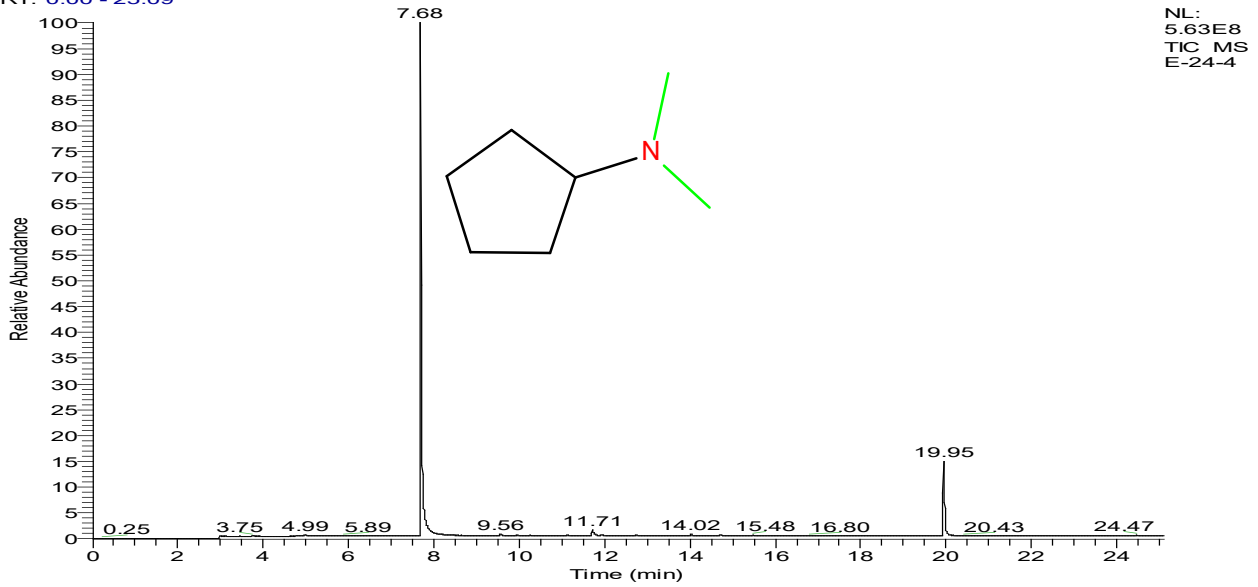

E-24-4 #2248 RT: 7.68 AV: 1 NL: 1.95E8  
T: + c EI Full ms [15.00-400.00]

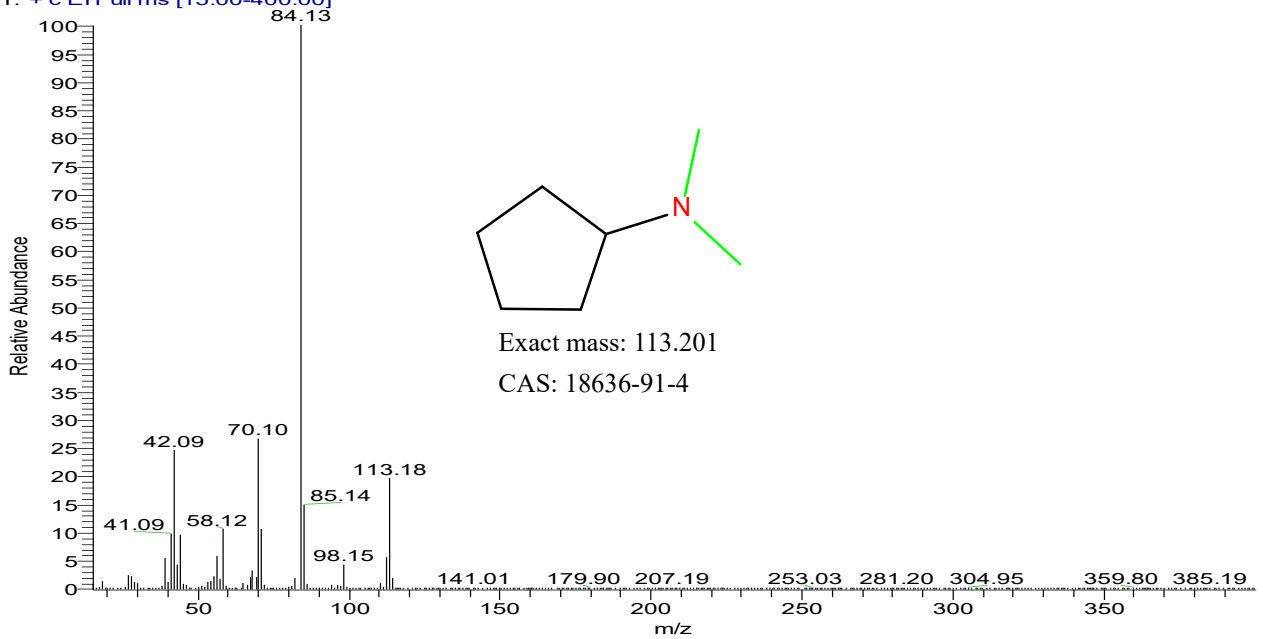

22

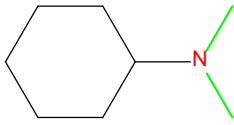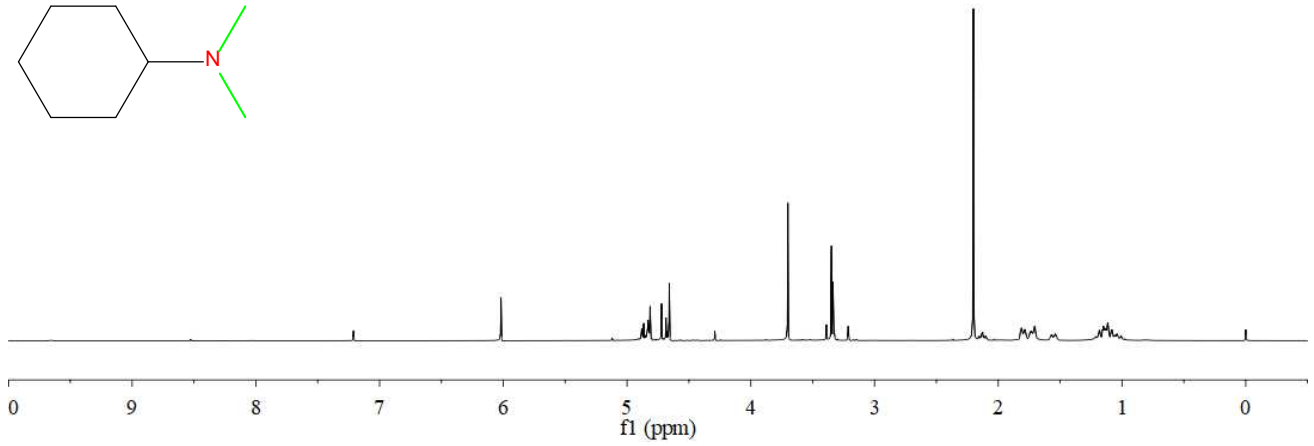

RT: 0.00 - 25.10

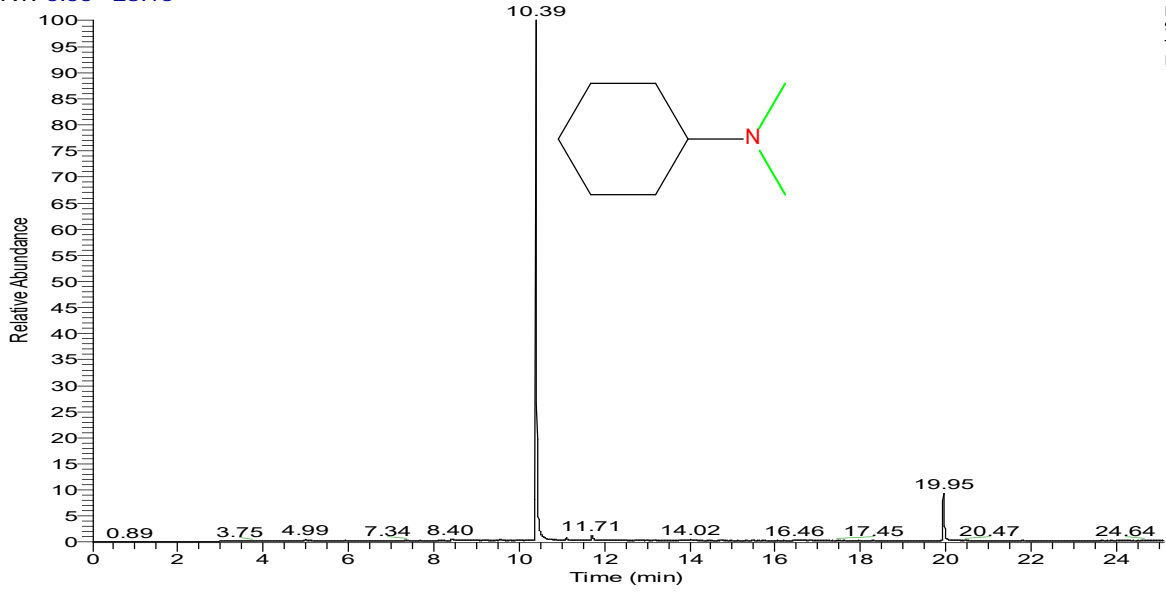

E-24-3 #3045 RT: 10.39 AV: 1 NL: 2.64E8  
T: + c EI Full ms [15.00-400.00]

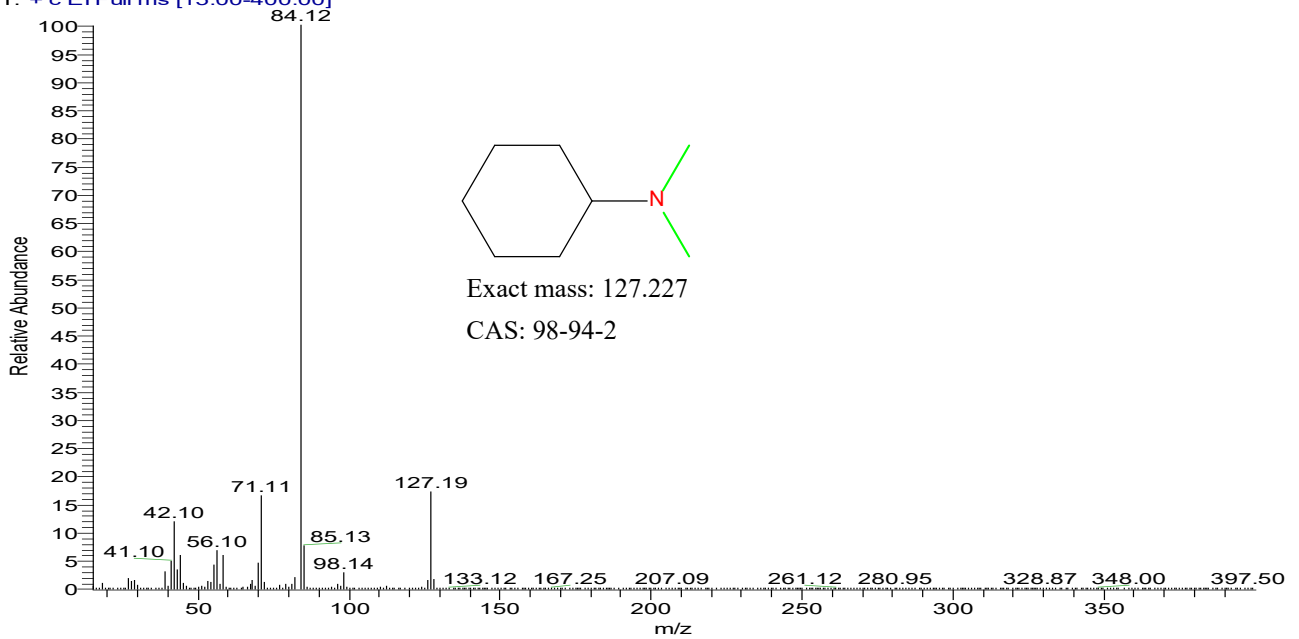

23

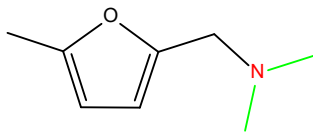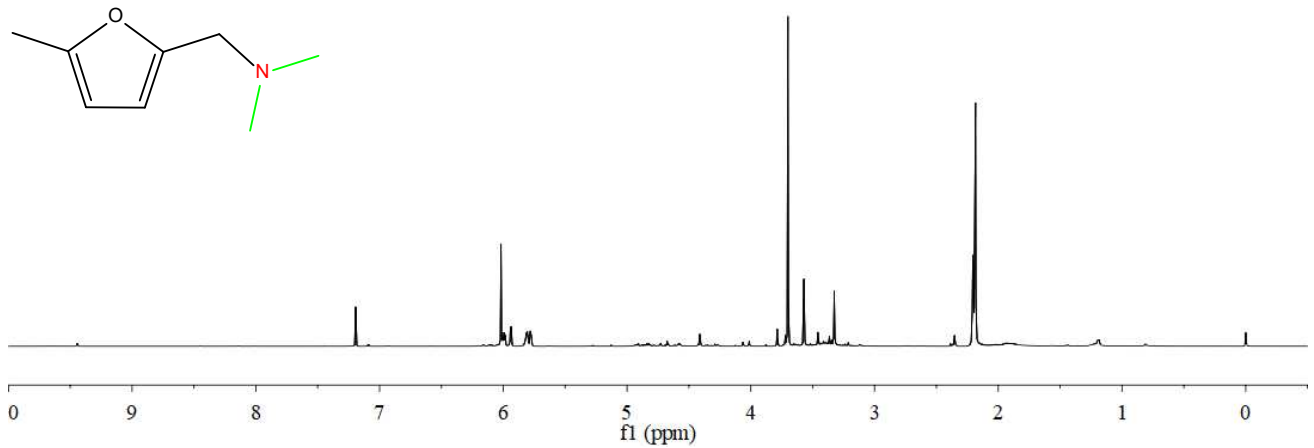

RT: 0.00 - 25.12

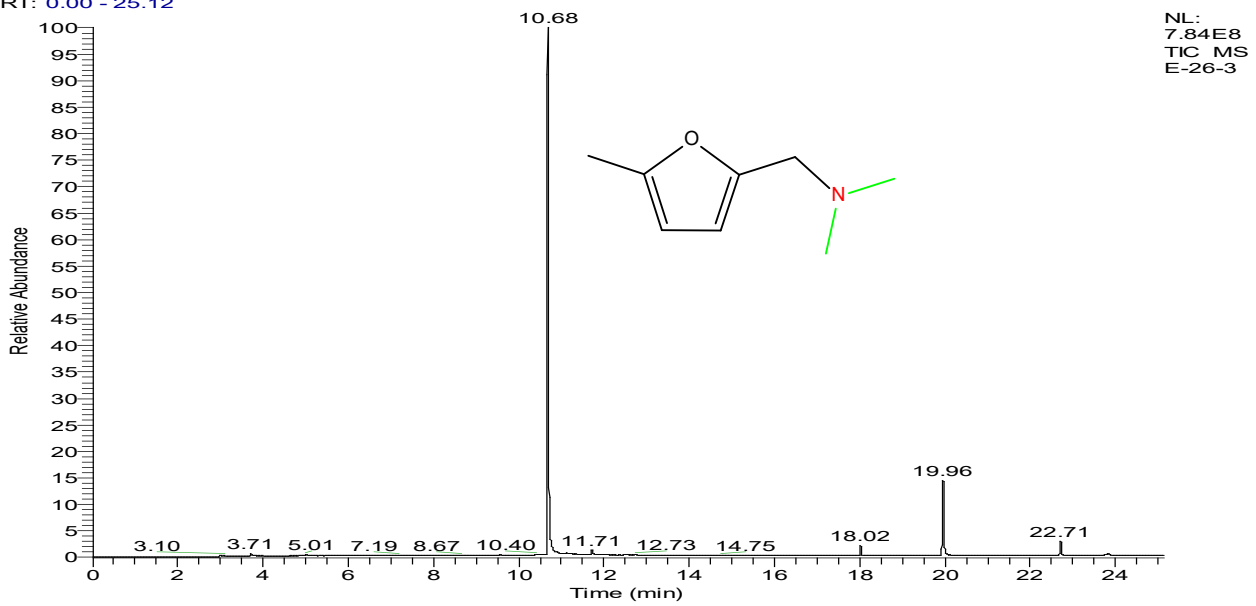

E-26-3 #3130 RT: 10.68 AV: 1 NL: 3.18E8  
T: + c EI Full ms [15.00-400.00]

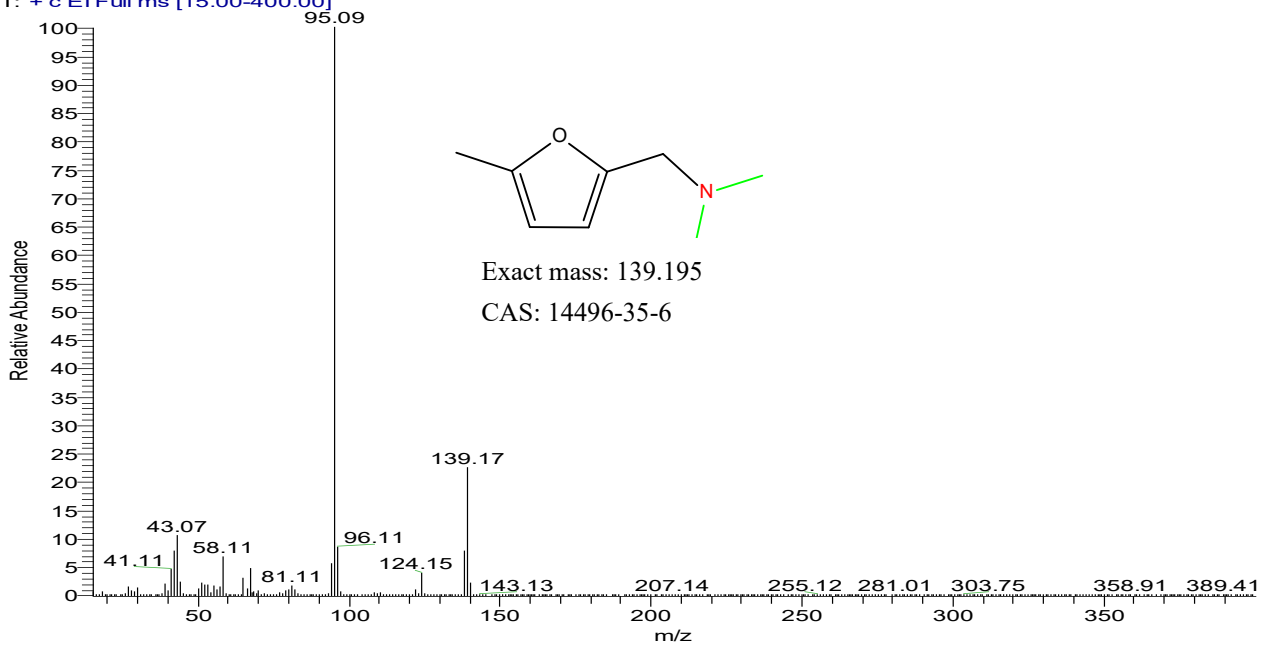

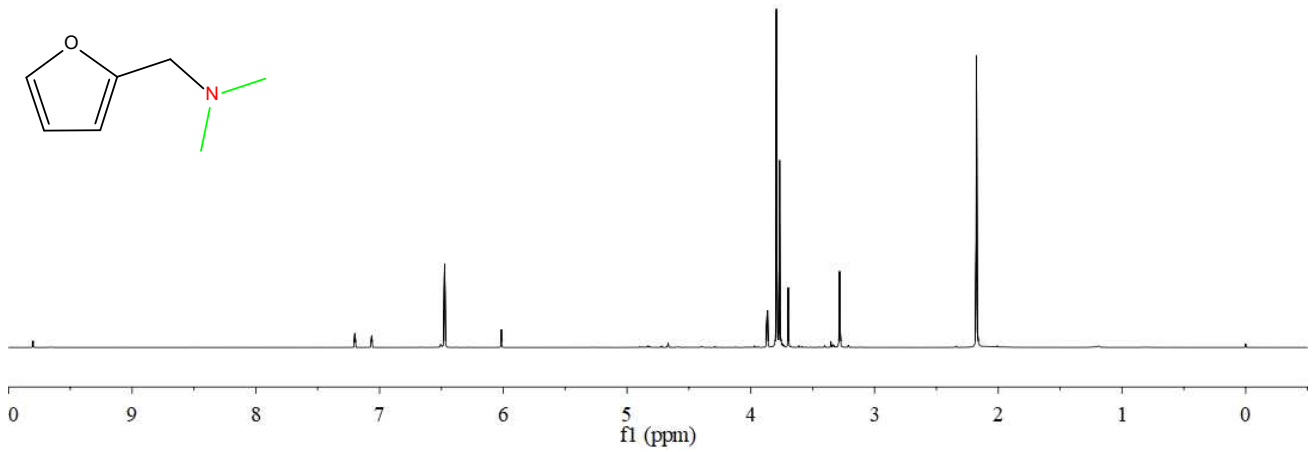

RT: 0.00 - 25.10

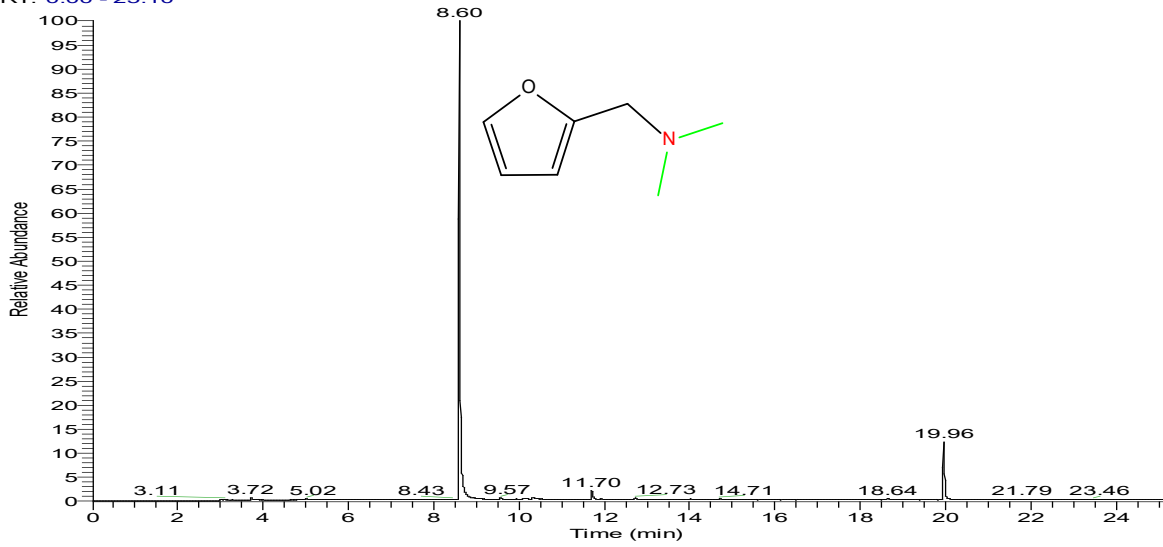

NL: 7.45E8  
TIC\_MS  
E-27-5

E-27-5 #2520 RT: 8.60 AV: 1 NL: 2.16E8  
T: + c EI Full ms [15.00-400.00]

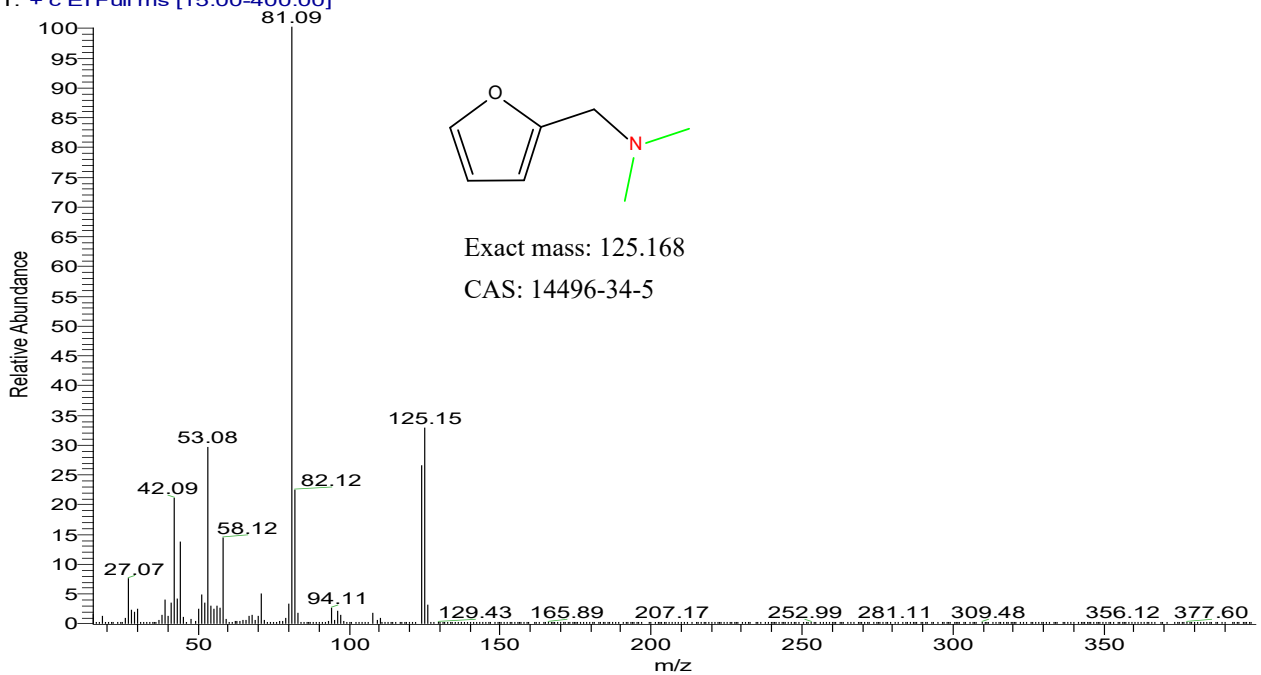

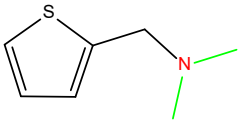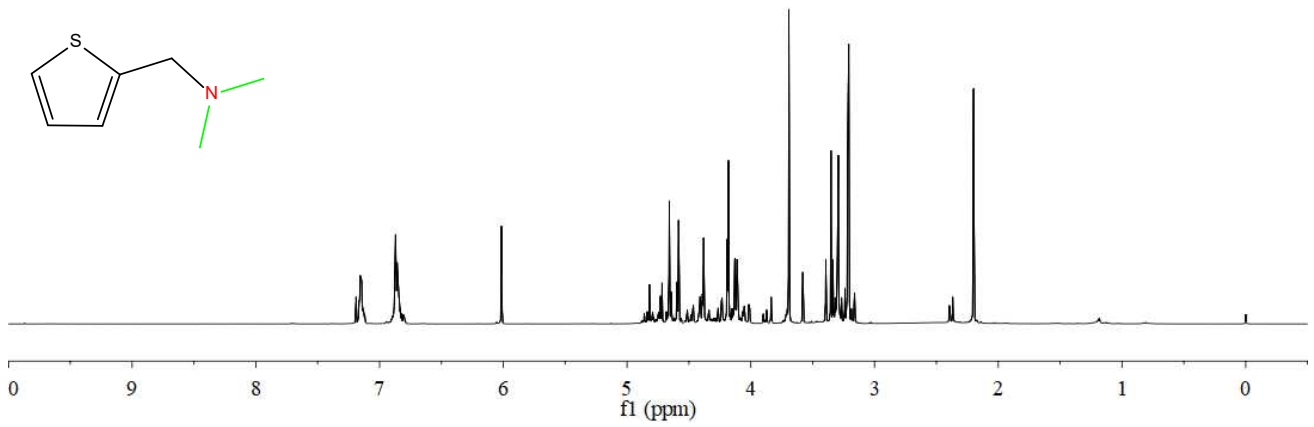

RT: 0.00 - 25.09

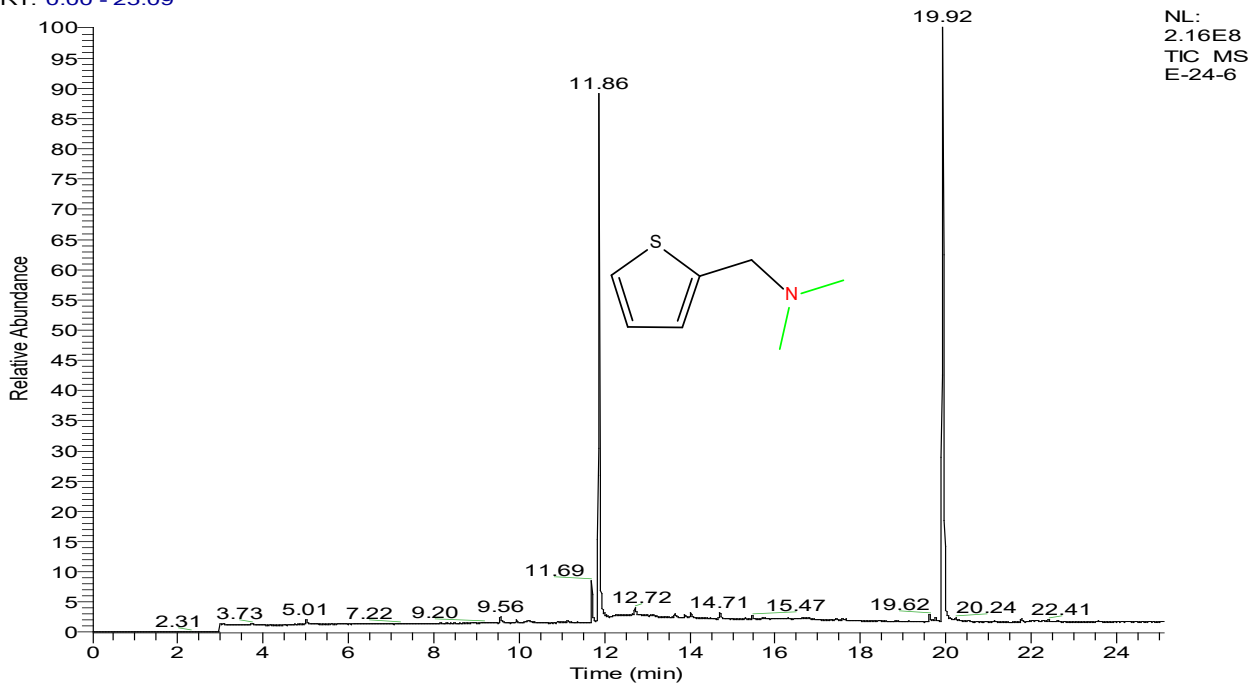

E-24-6 #3477 RT: 11.86 AV: 1 NL: 5.66E7  
T: + c EI Full ms [15.00-400.00]

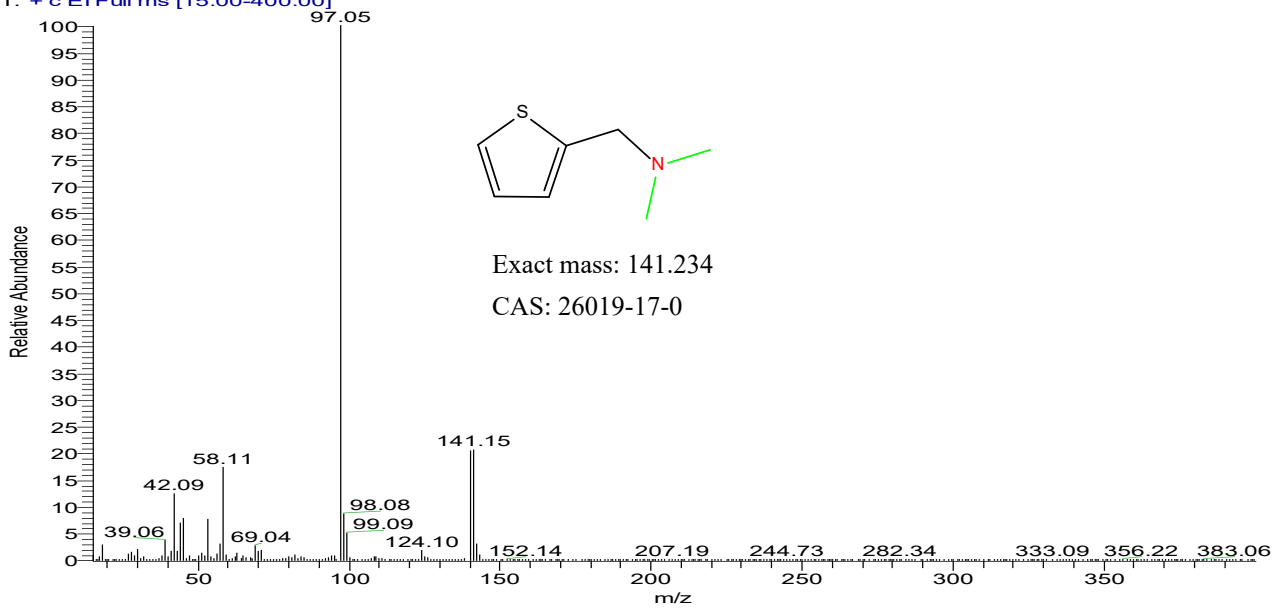

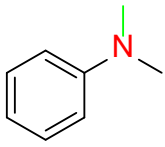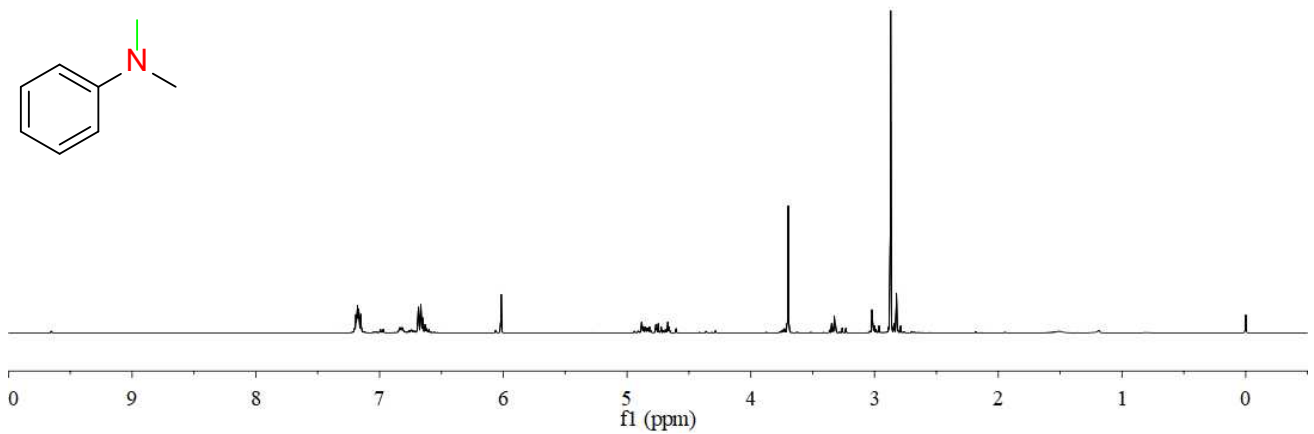

RT: 0.00 - 25.09

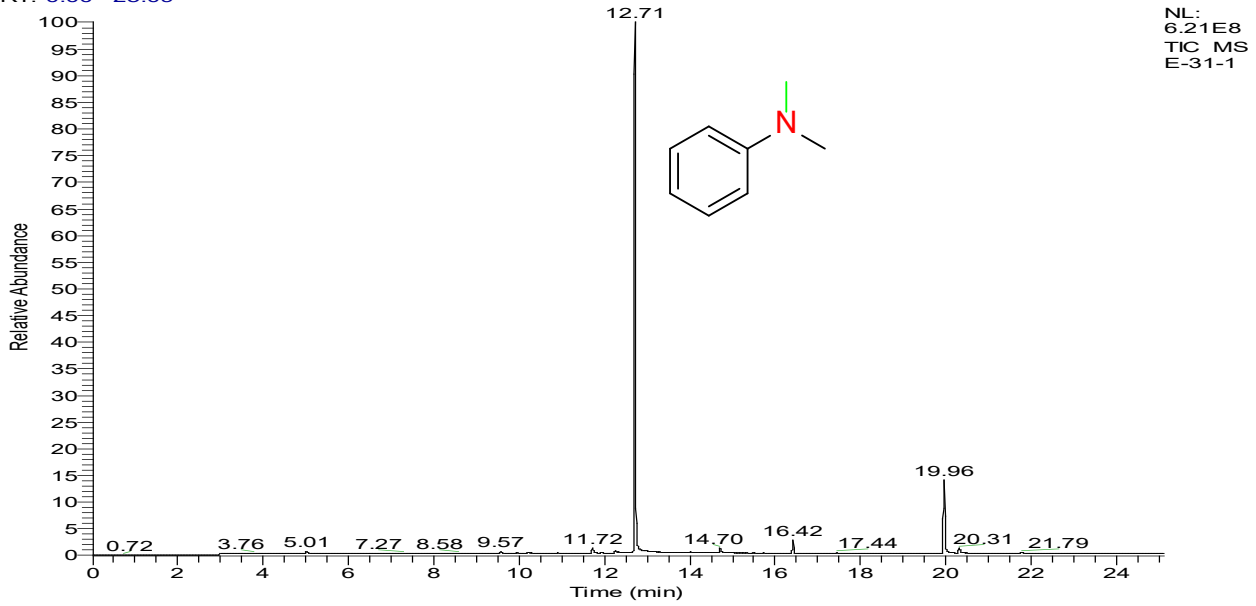

E-31-1 #3727 RT: 12.71 AV: 1 NL: 1.63E8  
T: + c EI Full ms [15.00-400.00]

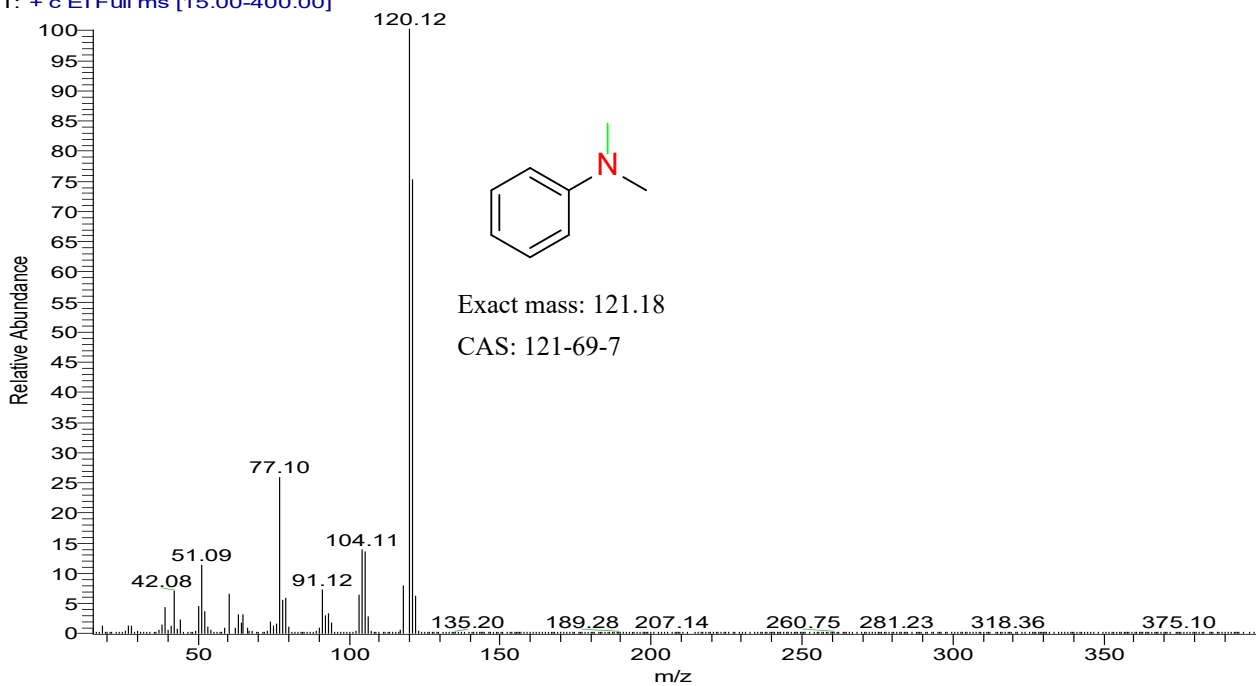



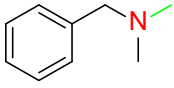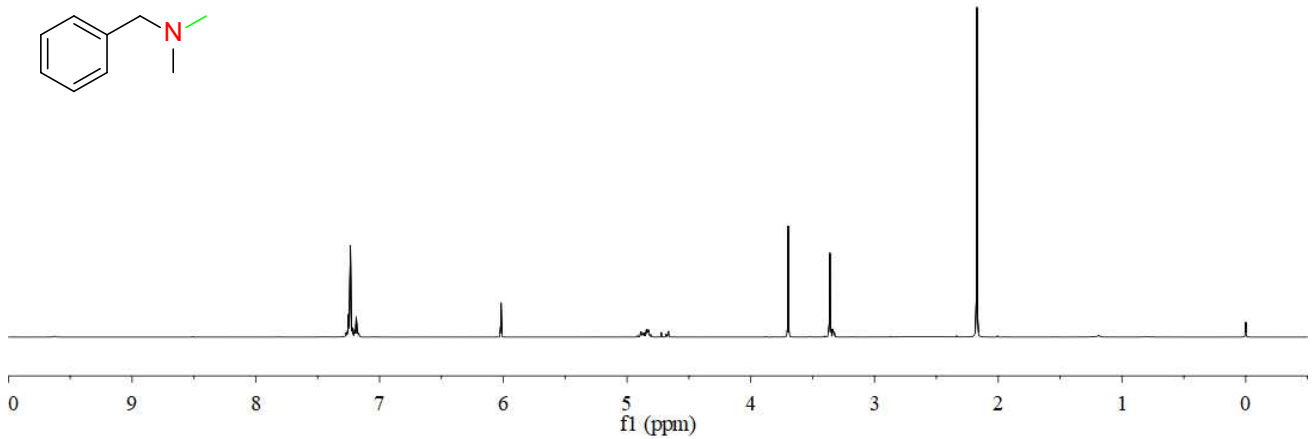

RT: 0.00 - 25.10

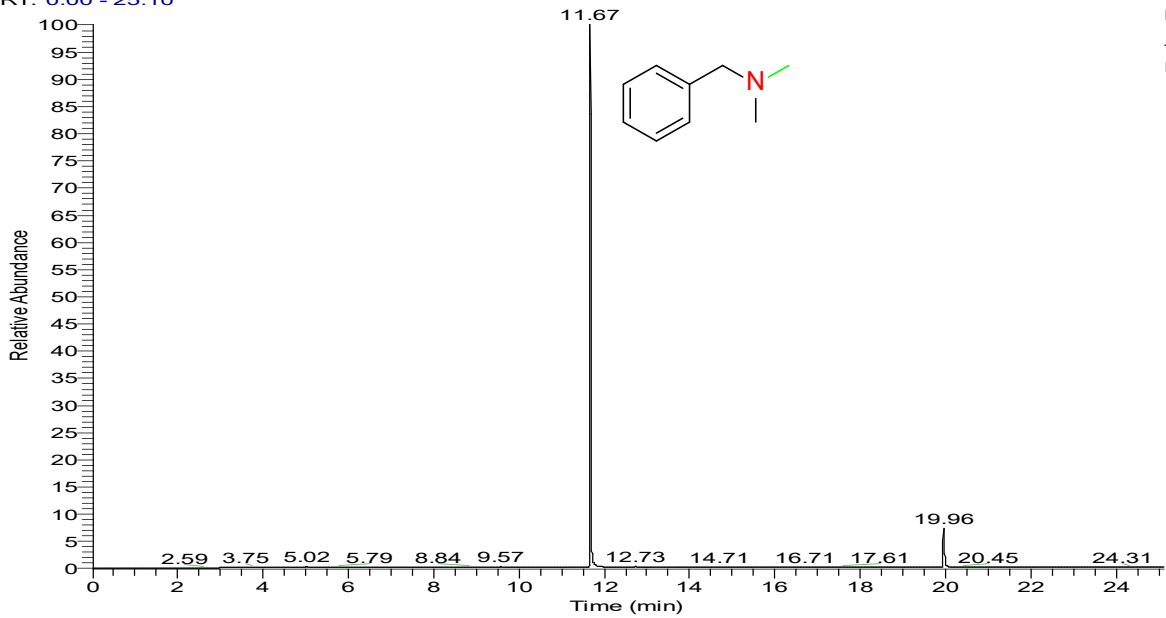NL:  
1.19E9  
TIC MS  
E-31-2E-31-2 #3422 RT: 11.67 AV: 1 NL: 3.39E8  
T: + c EI Full ms [15.00-400.00]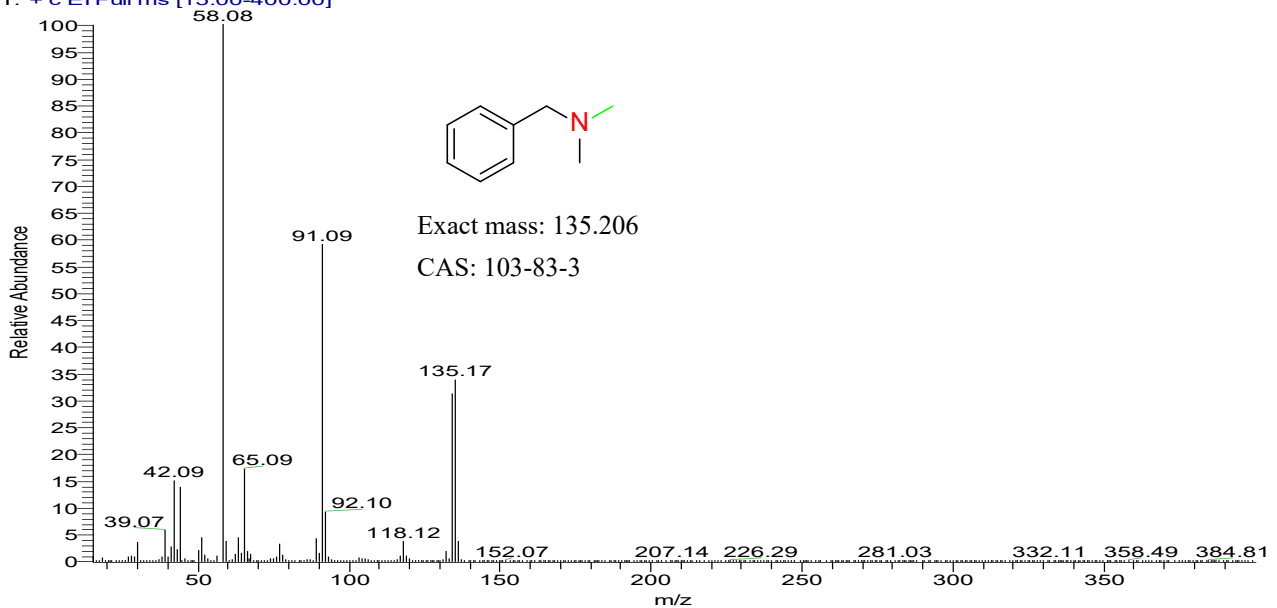

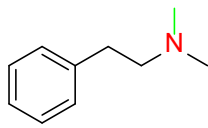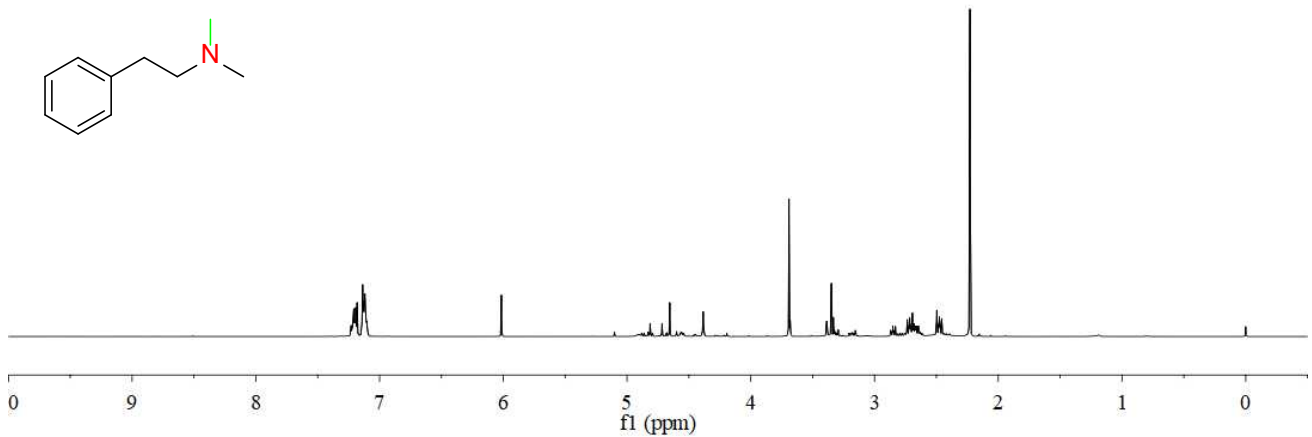

RT: 0.00 - 25.11

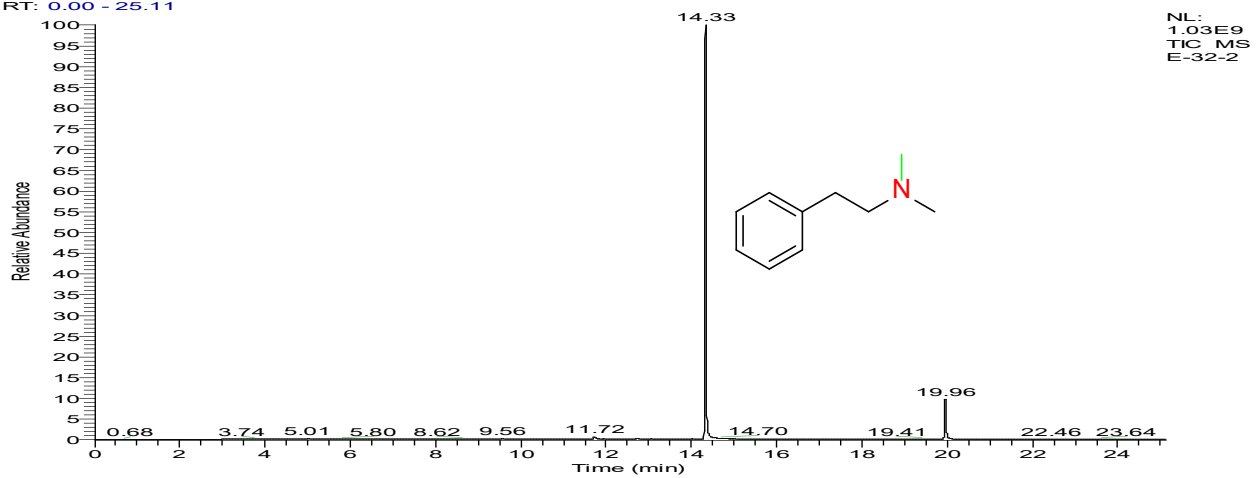E-32-2 #4204 RT: 14.33 AV: 1 NL: 6.98E8  
T: + c EI Full ms [15.00-400.00]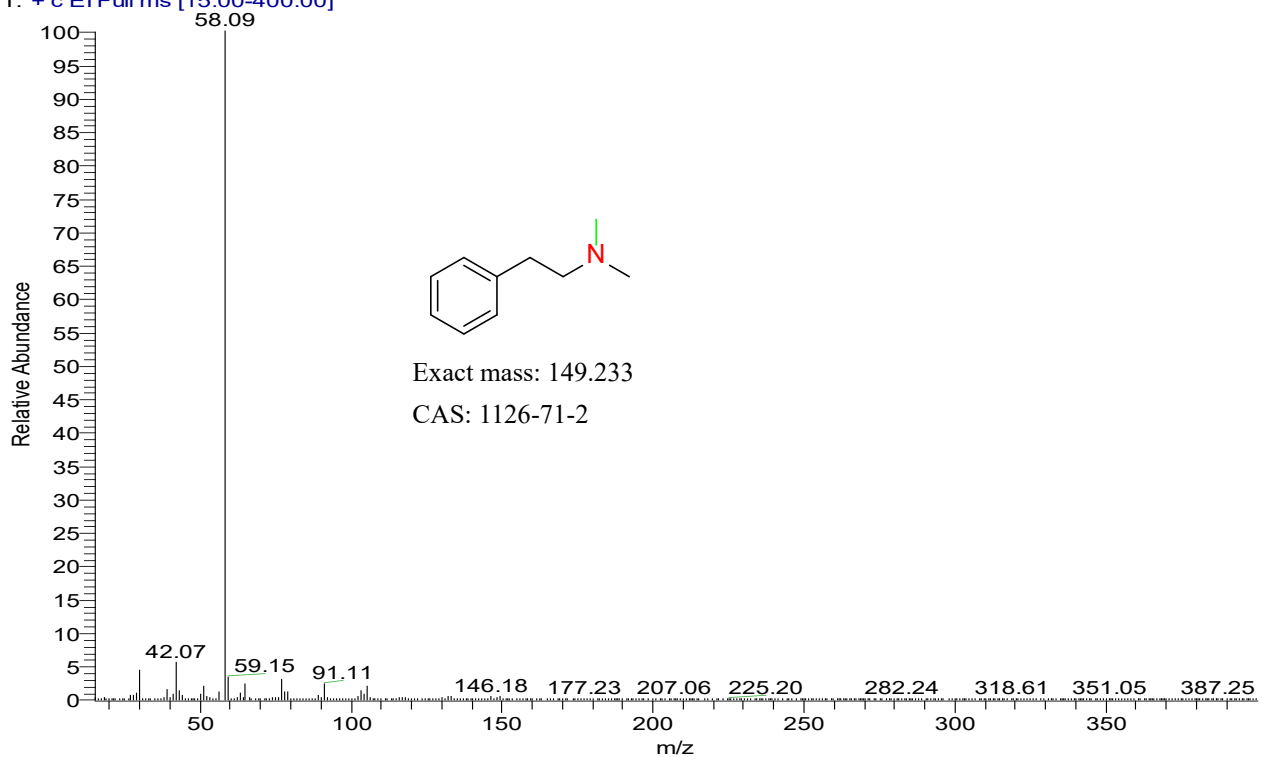

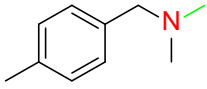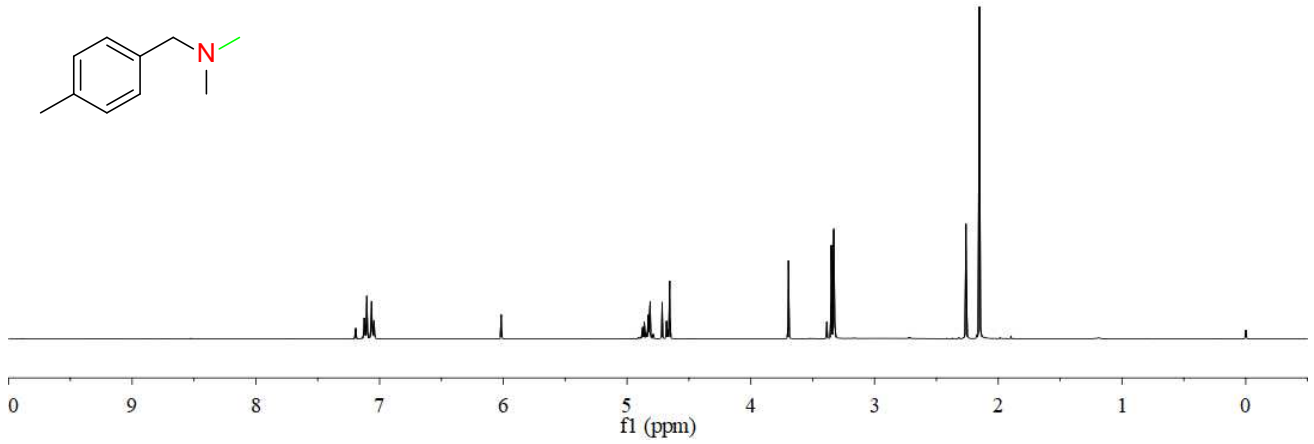

RT: 0.00 - 25.10

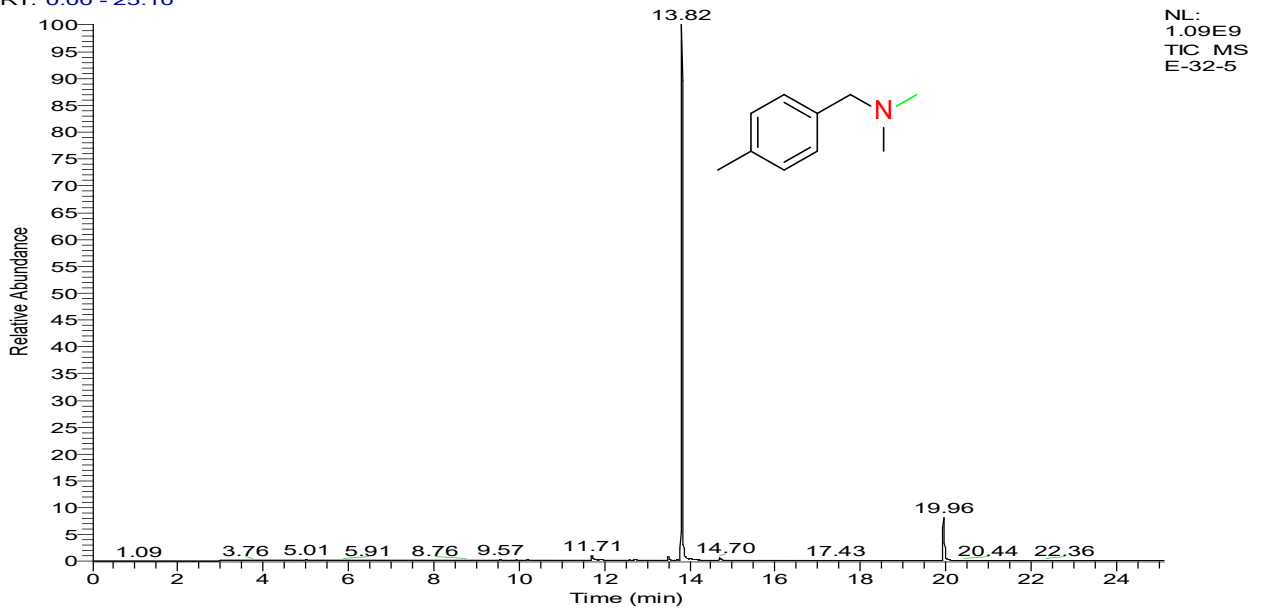

E-32-5 #4053 RT: 13.82 AV: 1 NL: 1.99E8  
T: + c EI Full ms [15.00-400.00]

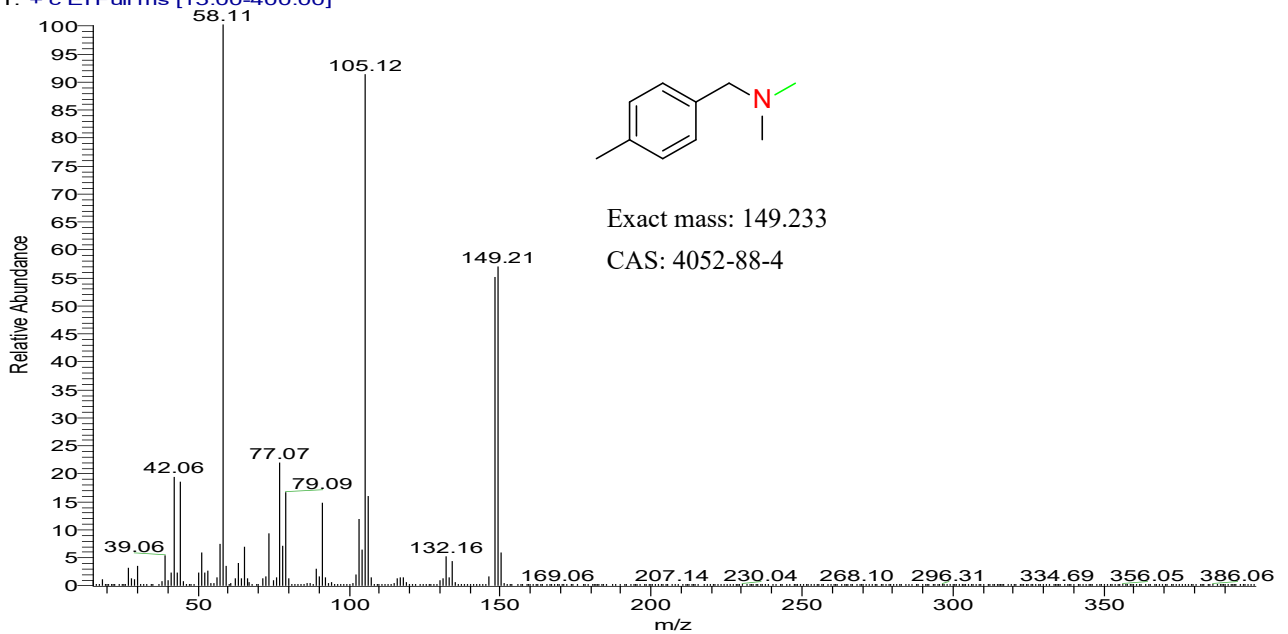

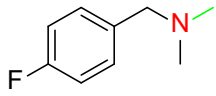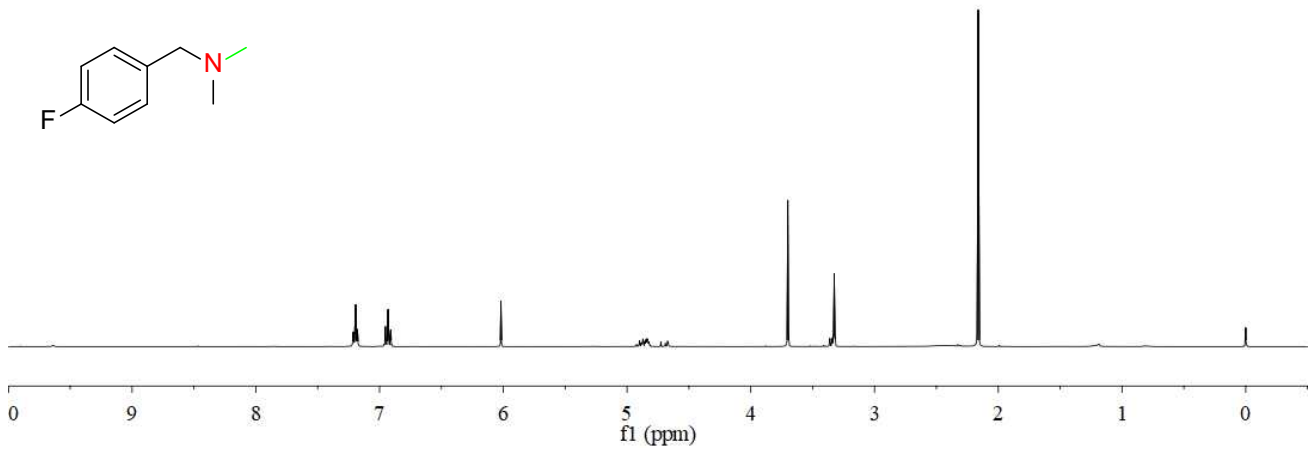

RT: 0.00 - 25.10

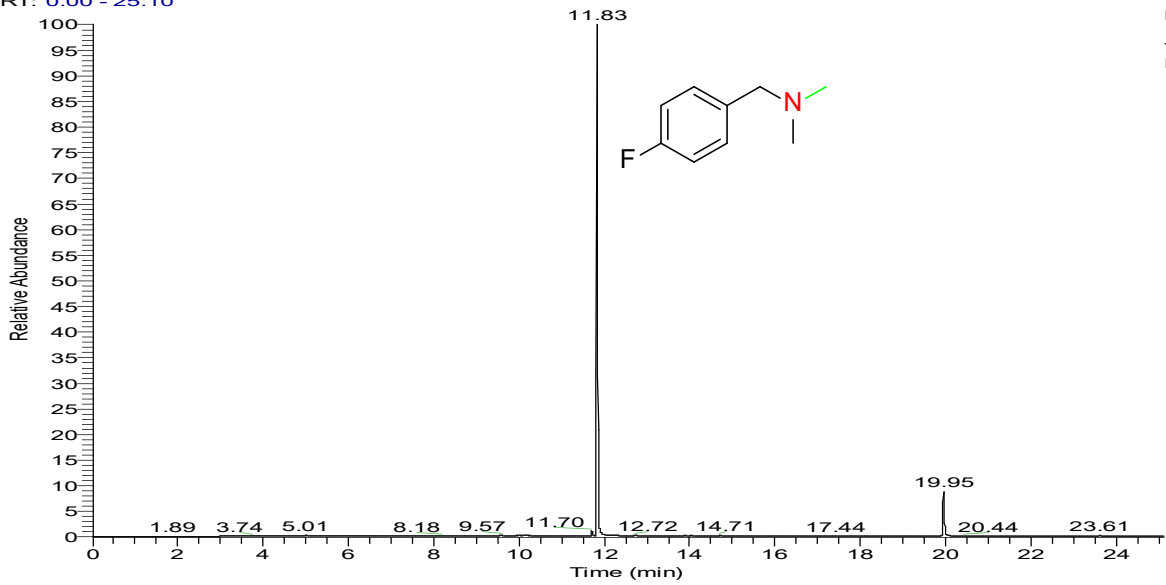

NL:  
1.07E9  
TIC MS  
E-32-4

E-32-4 #3469 RT: 11.83 AV: 1 NL: 2.31E8  
T: + c EI Full ms [15.00-400.00]

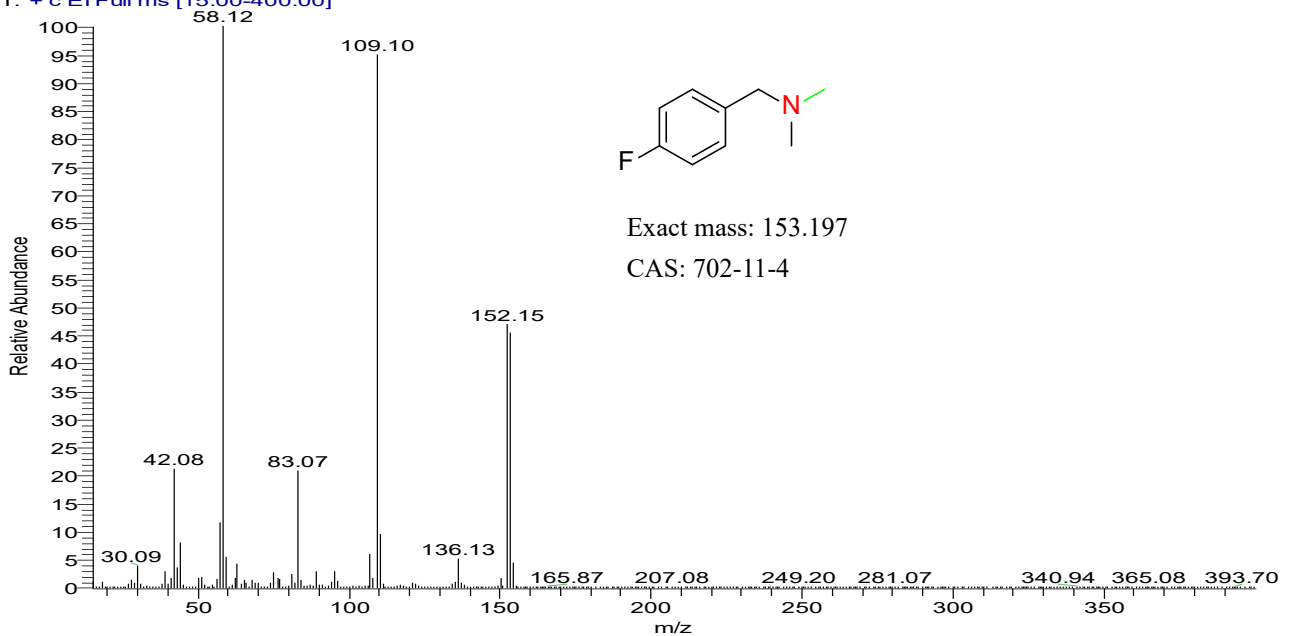

31

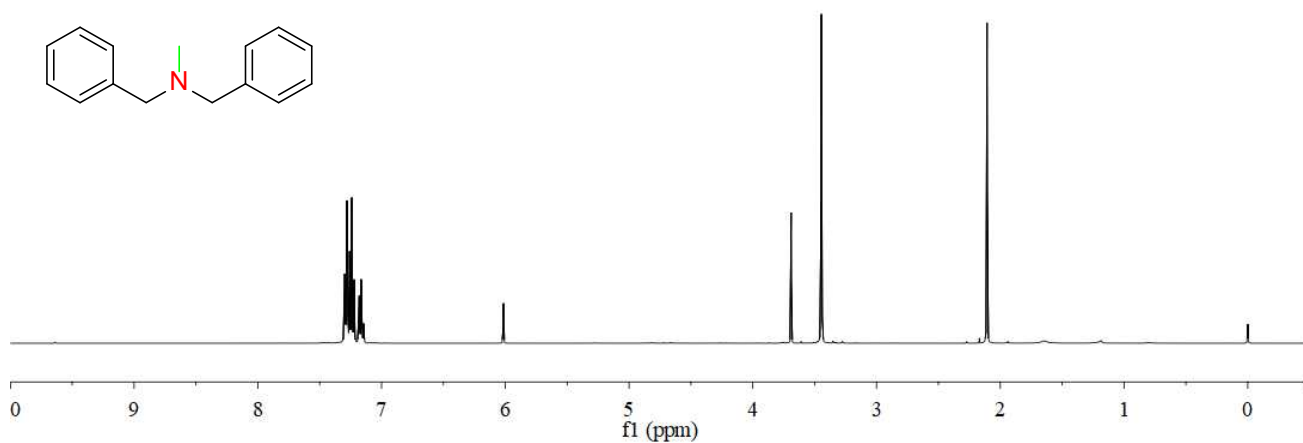

RT: 0.00 - 32.12

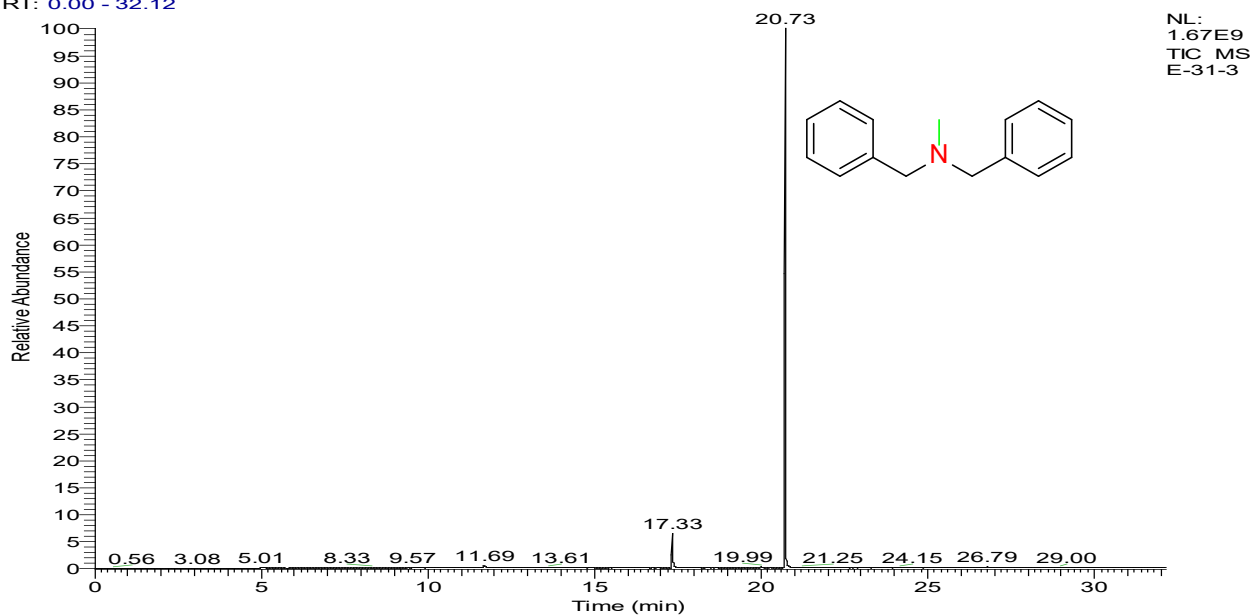

E-31-3 #6085 RT: 20.73 AV: 1 NL: 6.50E8  
T: +c EI Full ms [10.00-400.00]

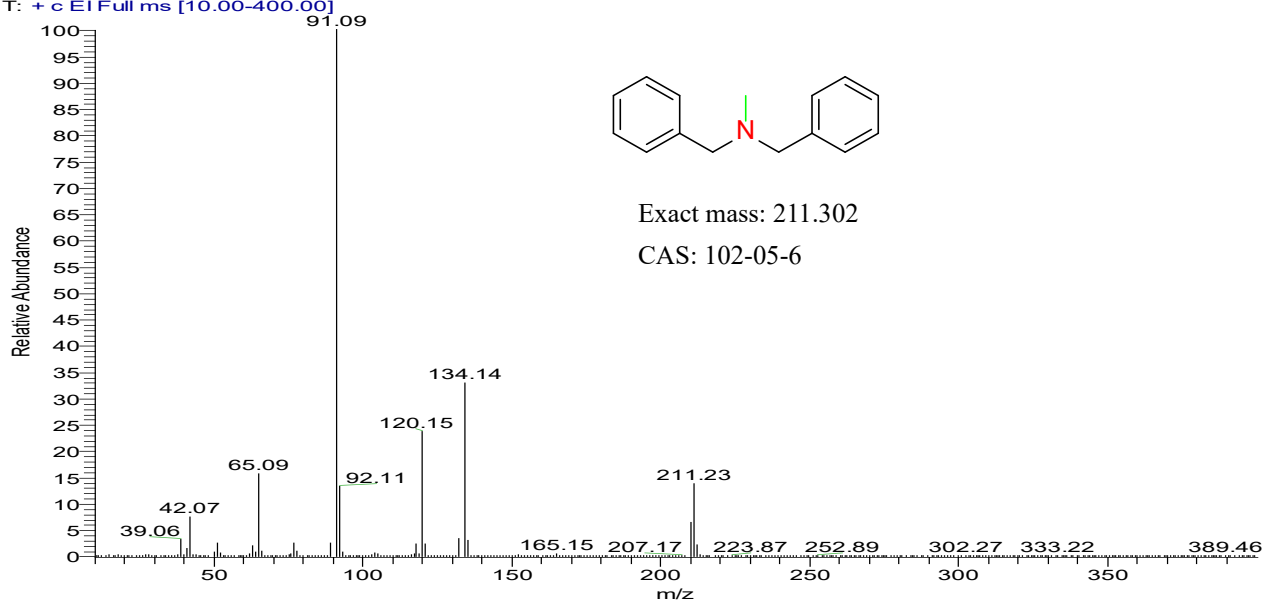

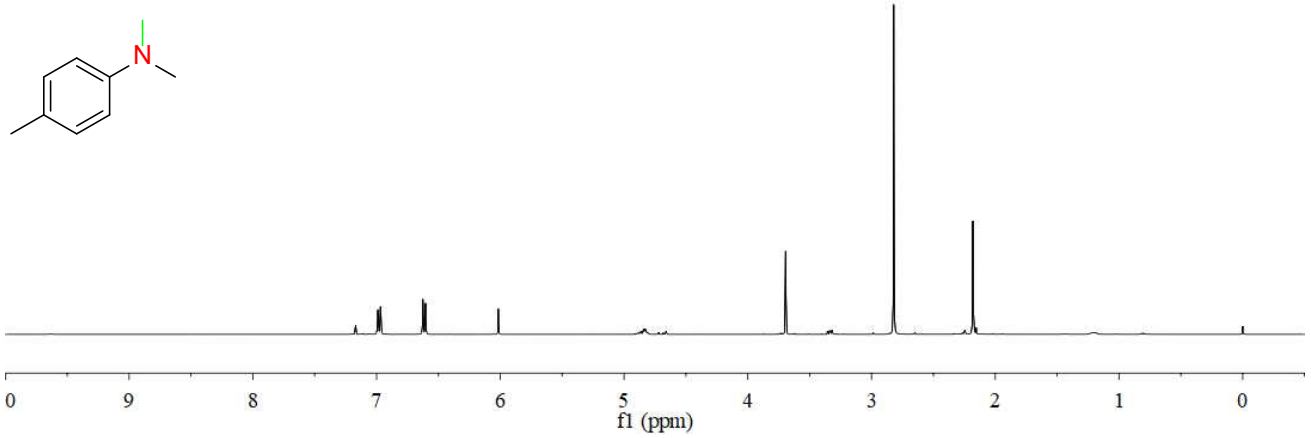

RT: 0.00 - 25.12

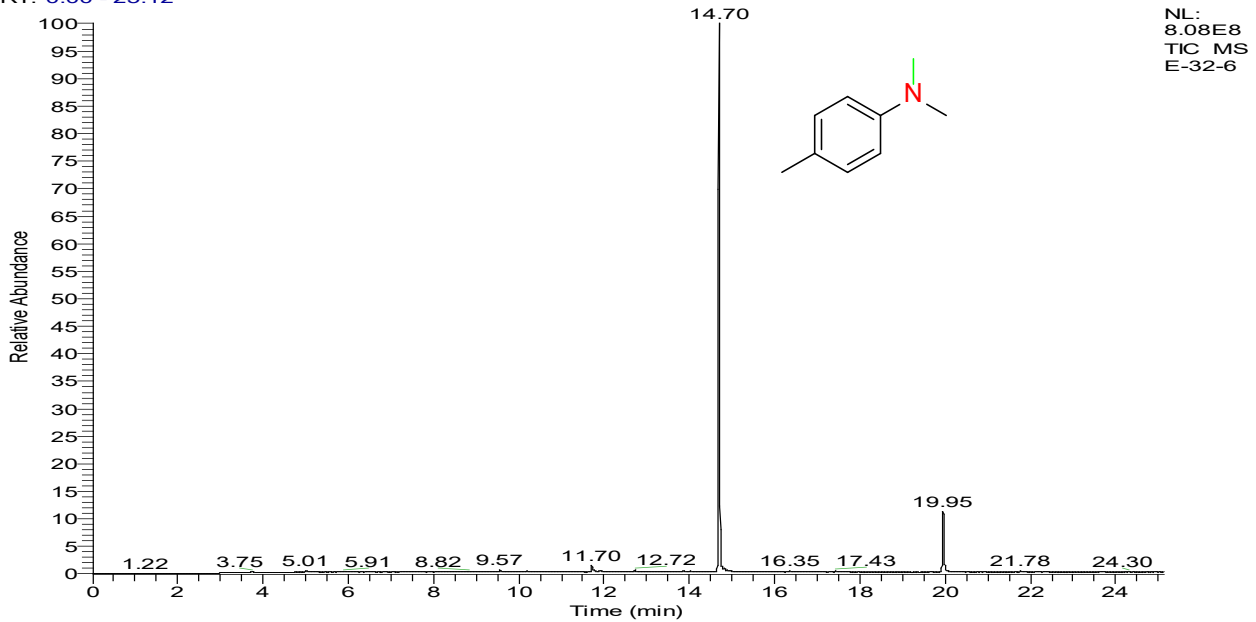E-32-6 #4312 RT: 14.70 AV: 1 NL: 2.44E8  
T: + c EI Full ms [15.00-400.00]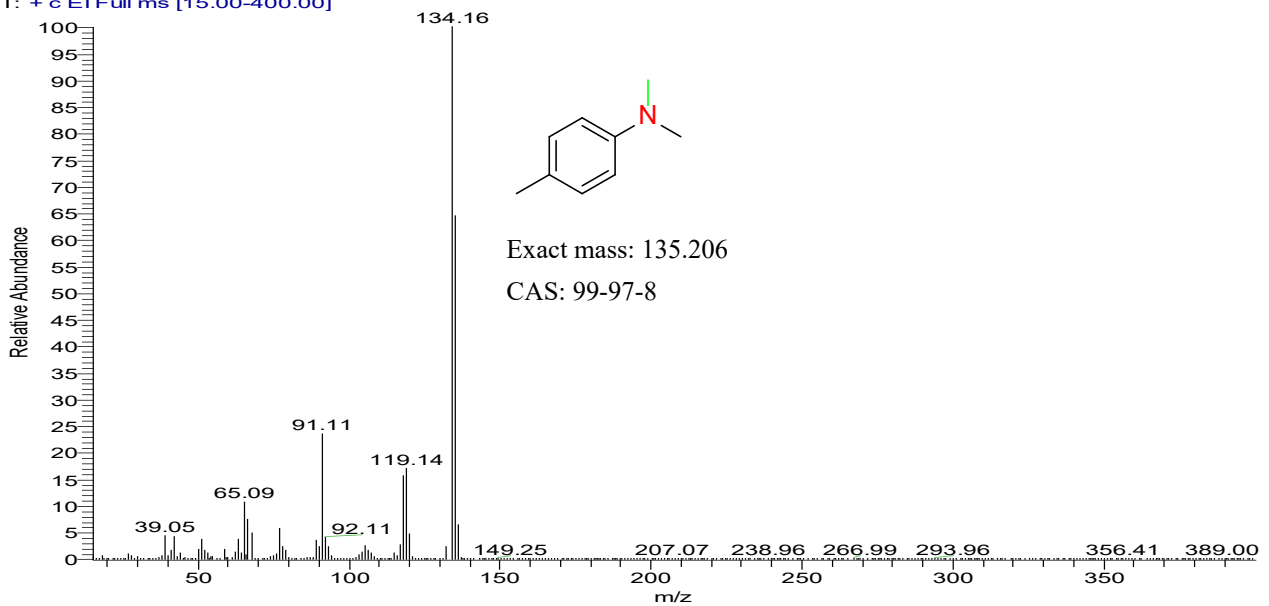

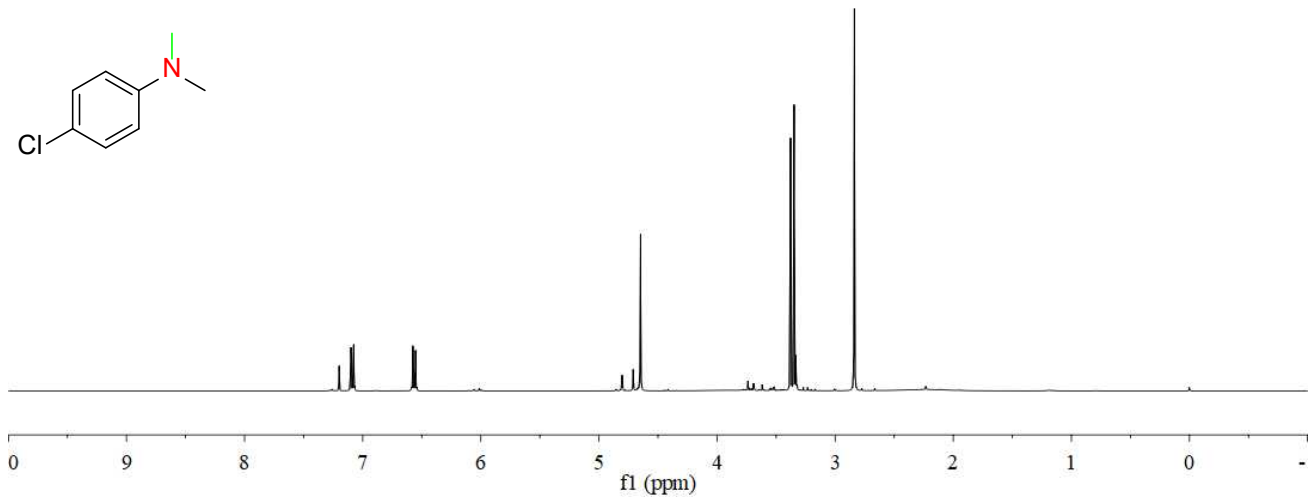

RT: 0.00 - 25.11

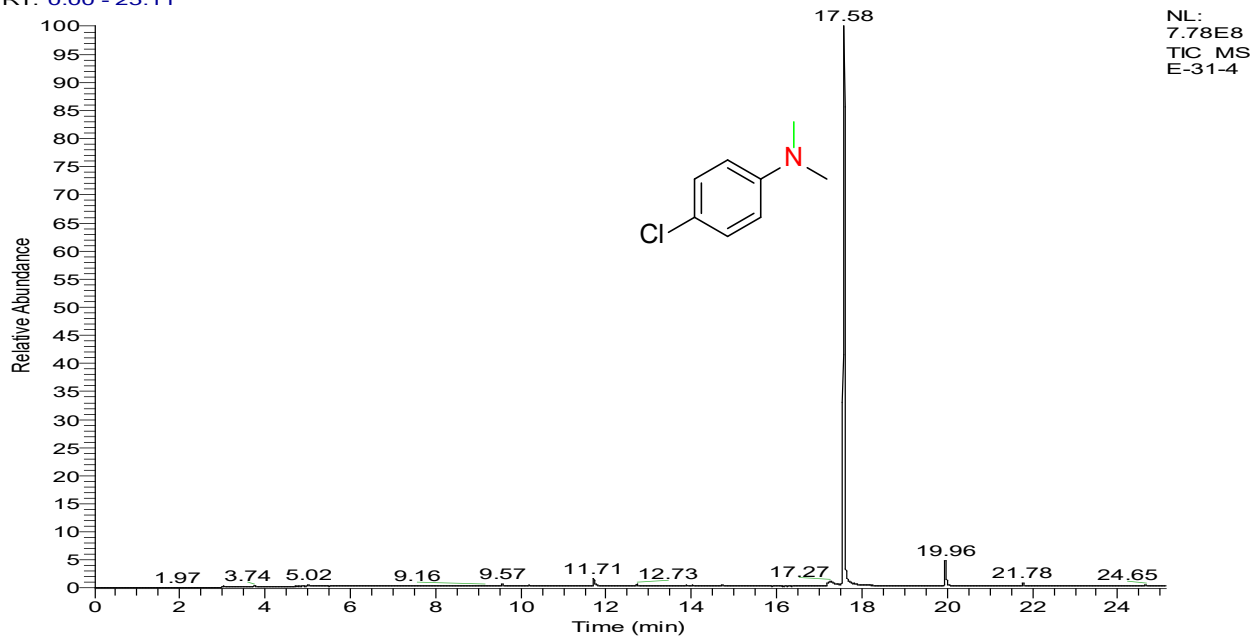E-31-4 #5159 RT: 17.58 AV: 1 NL: 1.58E8  
T: + c EI Full ms [15.00-400.00]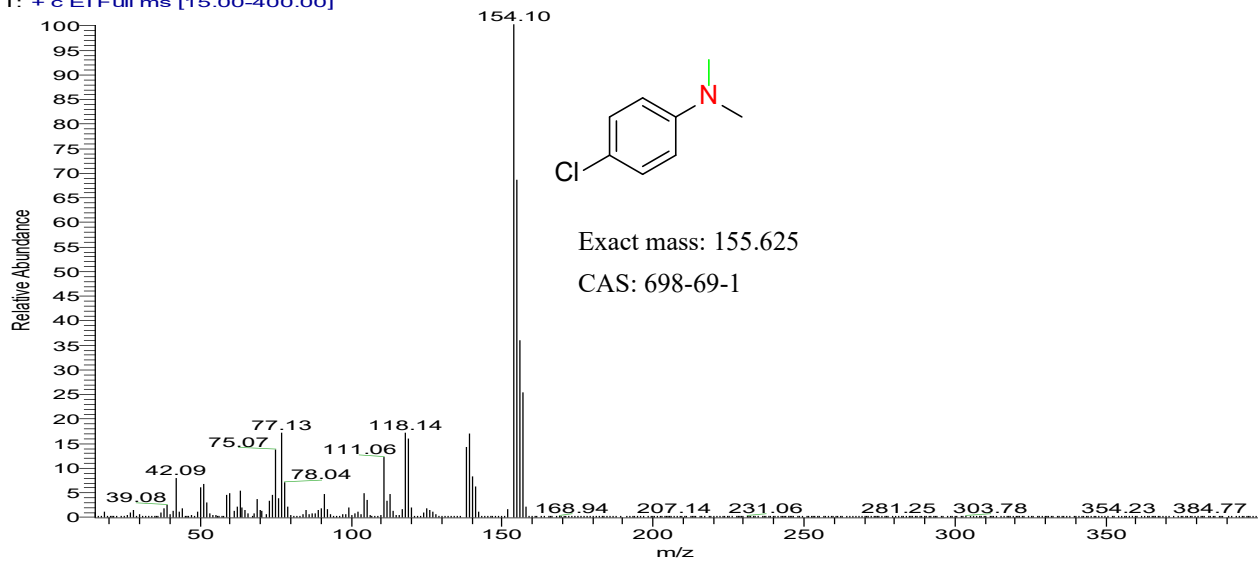

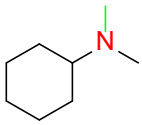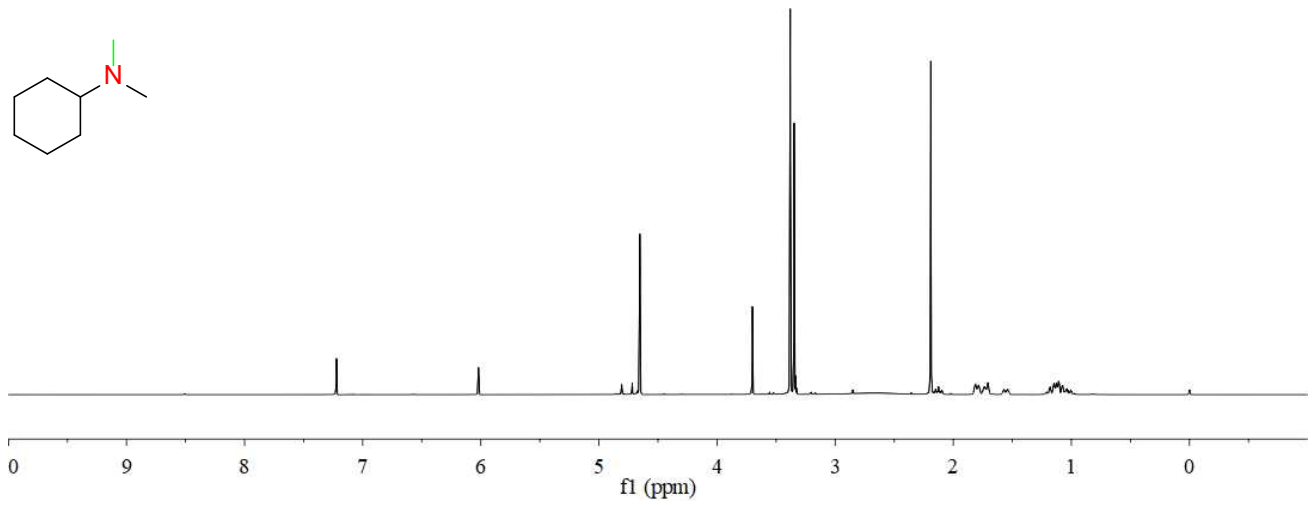

RT: 0.00 - 25.12

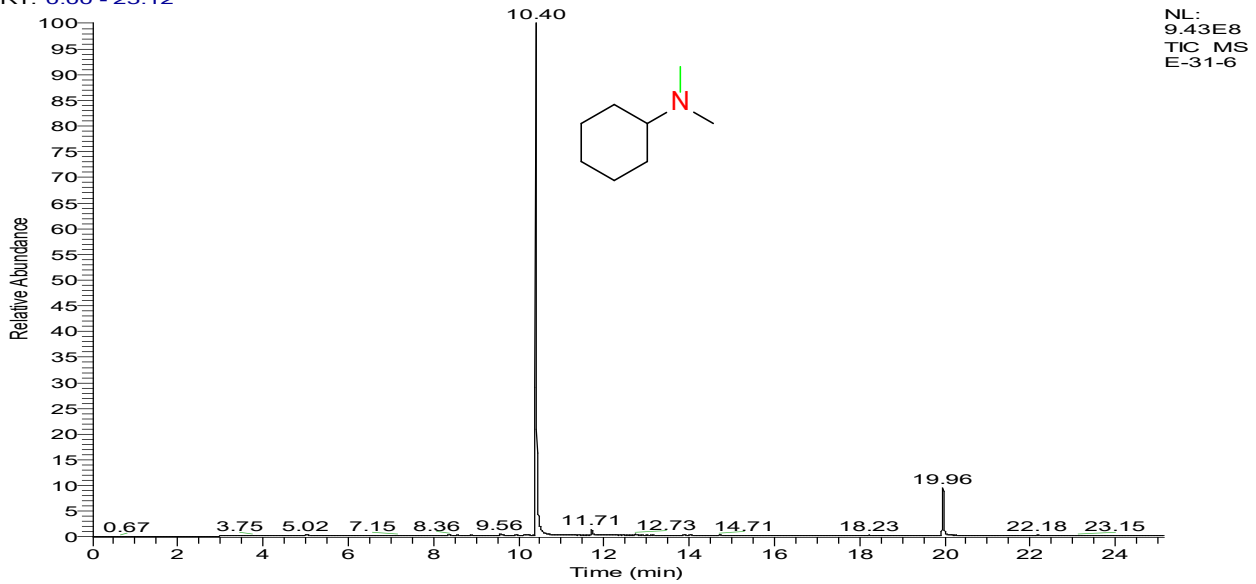

E-31-6 #3049 RT: 10.40 AV: 1 NL: 3.86E8  
T: + c EI Full ms [15.00-400.00]

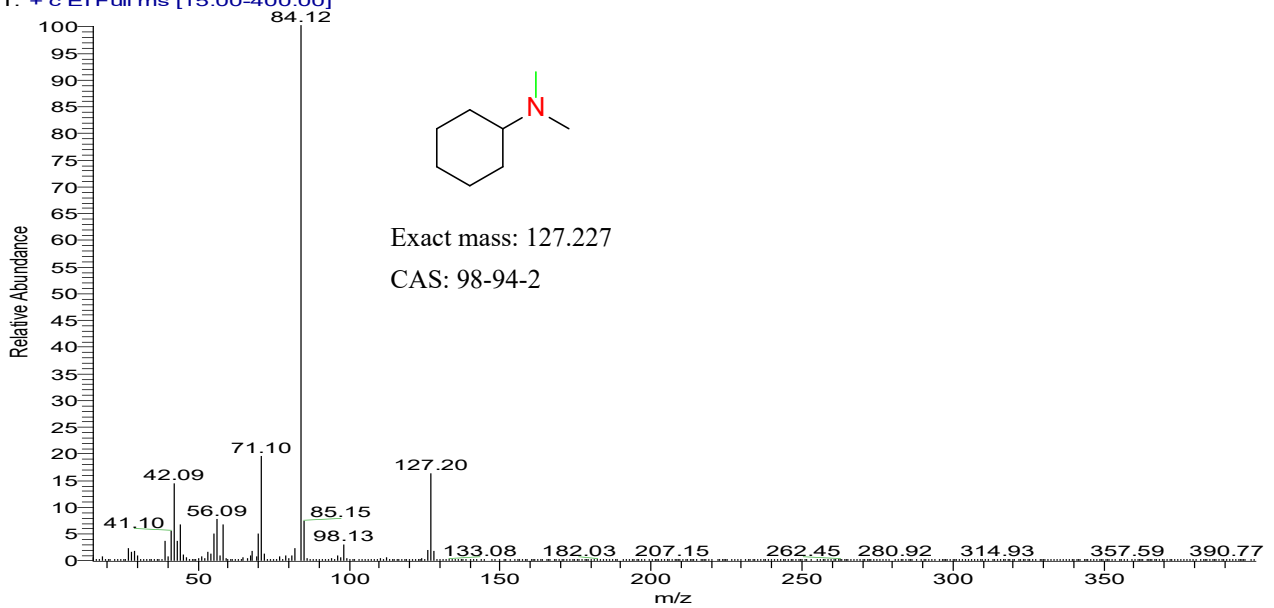



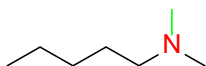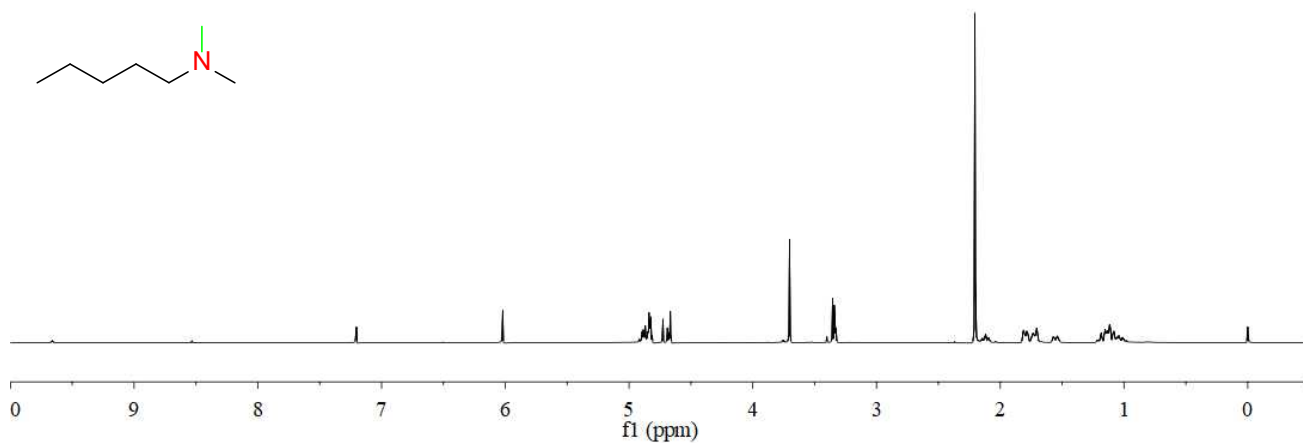

RT: 0.00 - 25.09

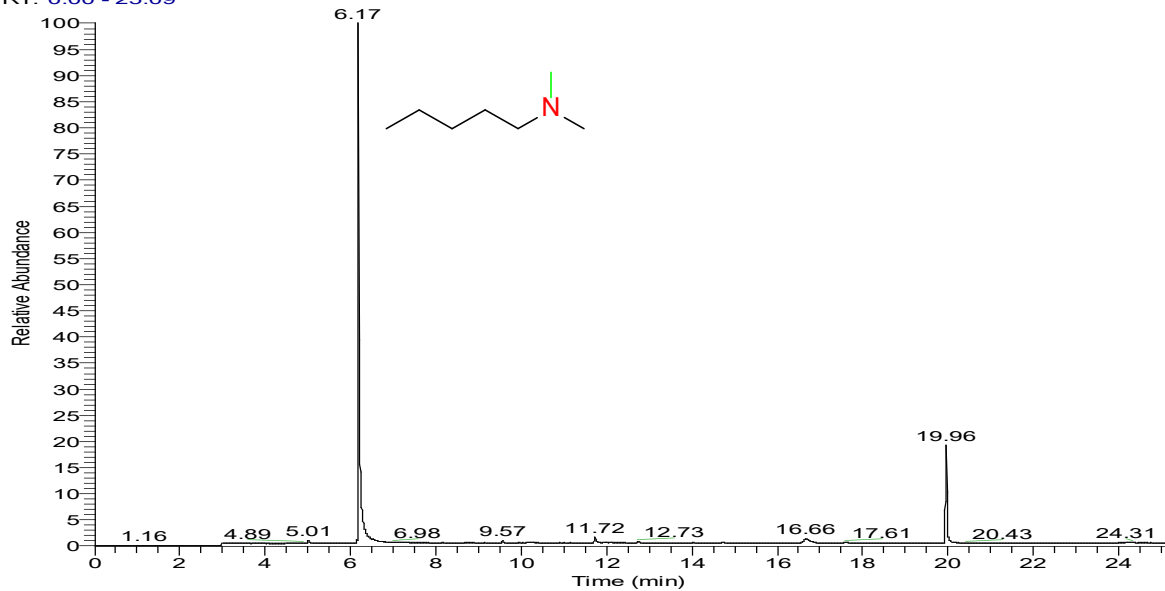NL:  
4.79E8  
TIC MS  
E-31-5E-31-5 #1804 RT: 6.17 AV: 1 NL: 3.25E8  
T: + c EI Full ms [15.00-400.00]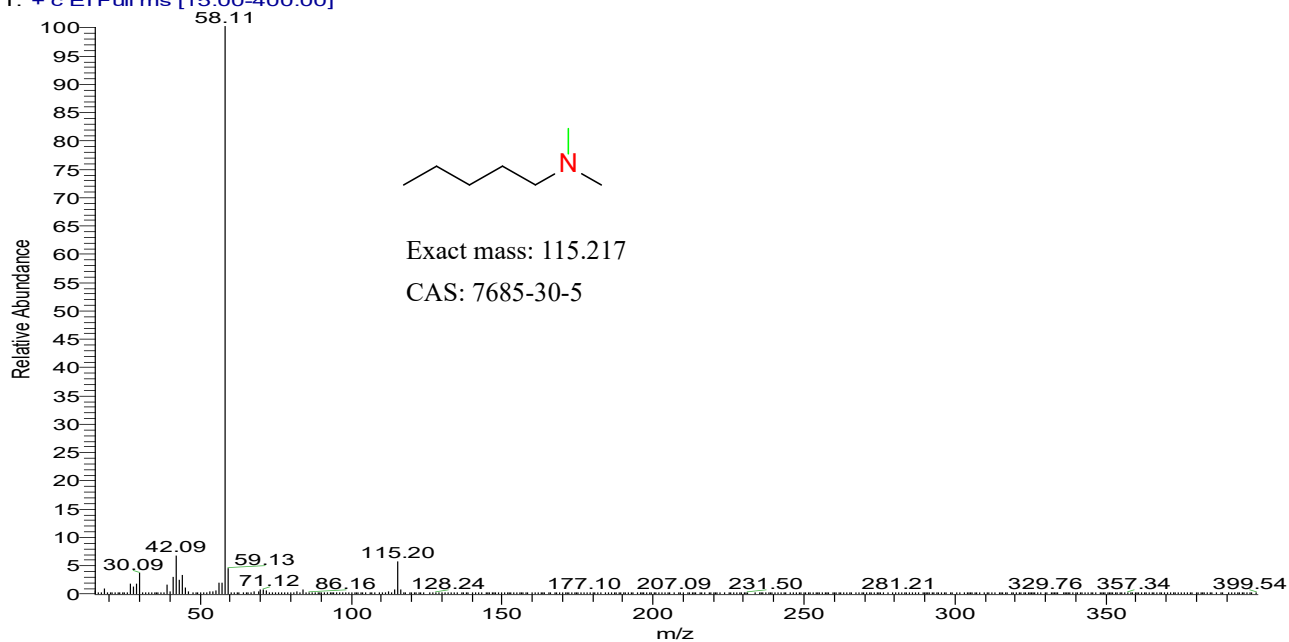

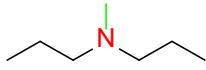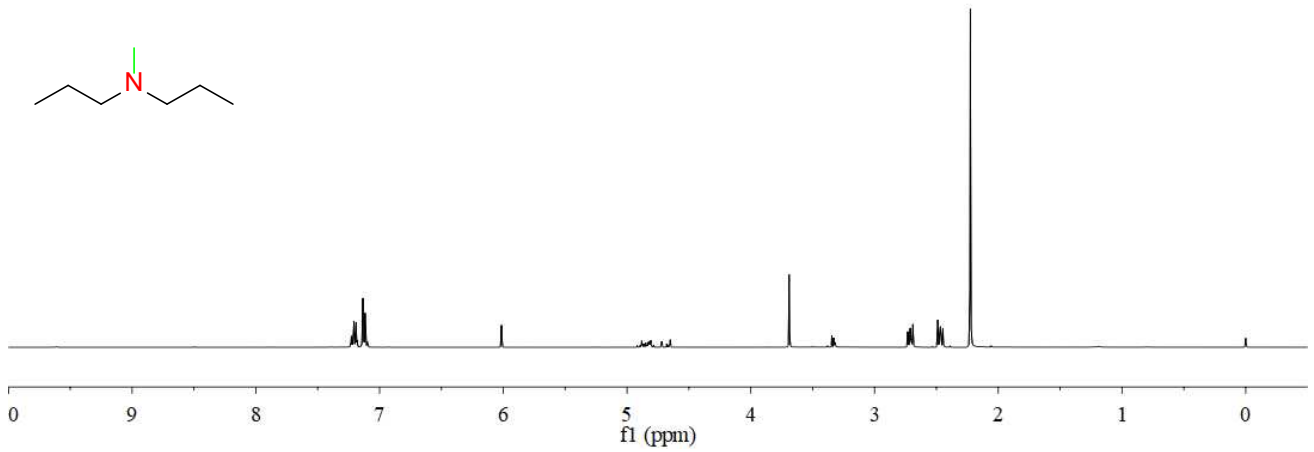

RT: 0.00 - 25.11

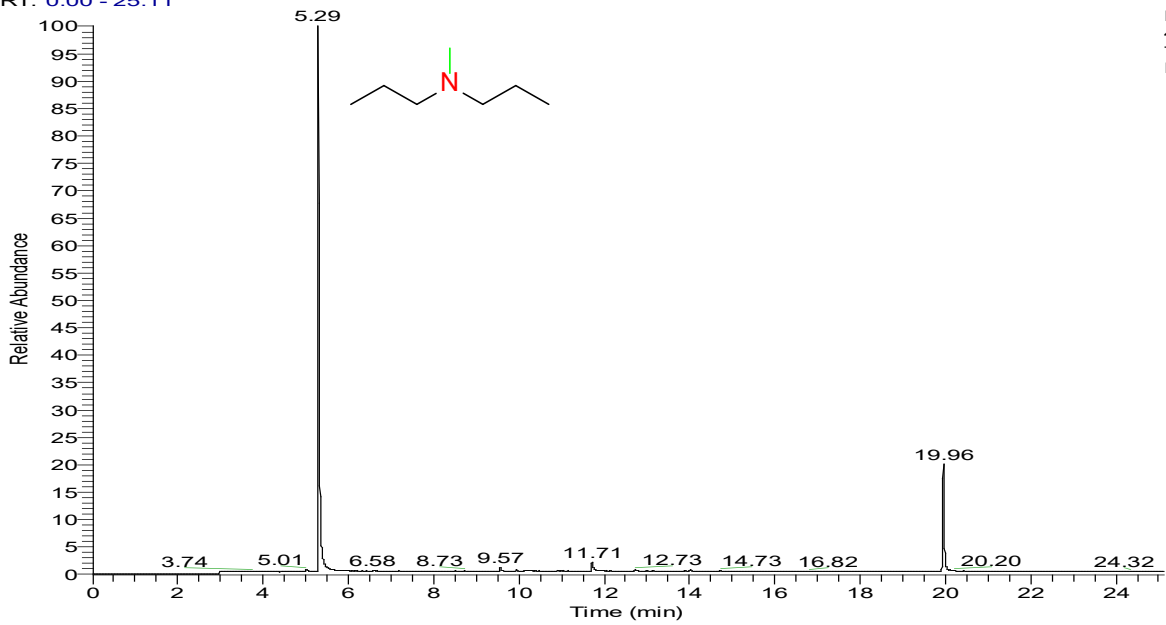

NL:  
4.66E8  
TIC MS  
E-32-1

E-32-1 #1545 RT: 5.29 AV: 1 NL: 1.47E8  
T: + c EI Full ms [15.00-400.00]

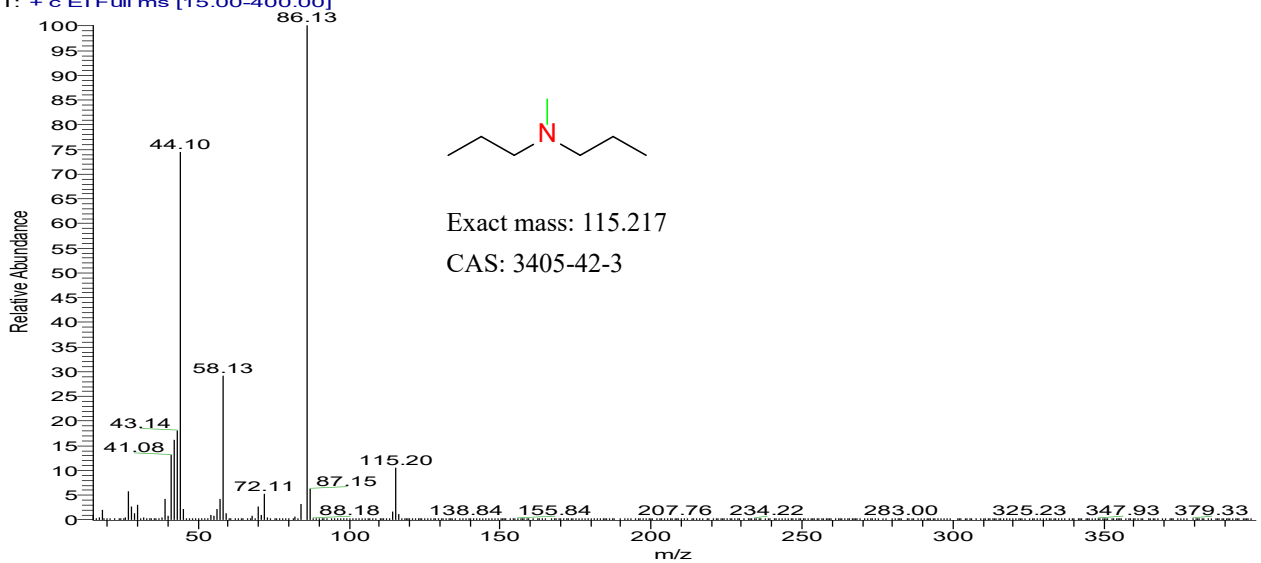

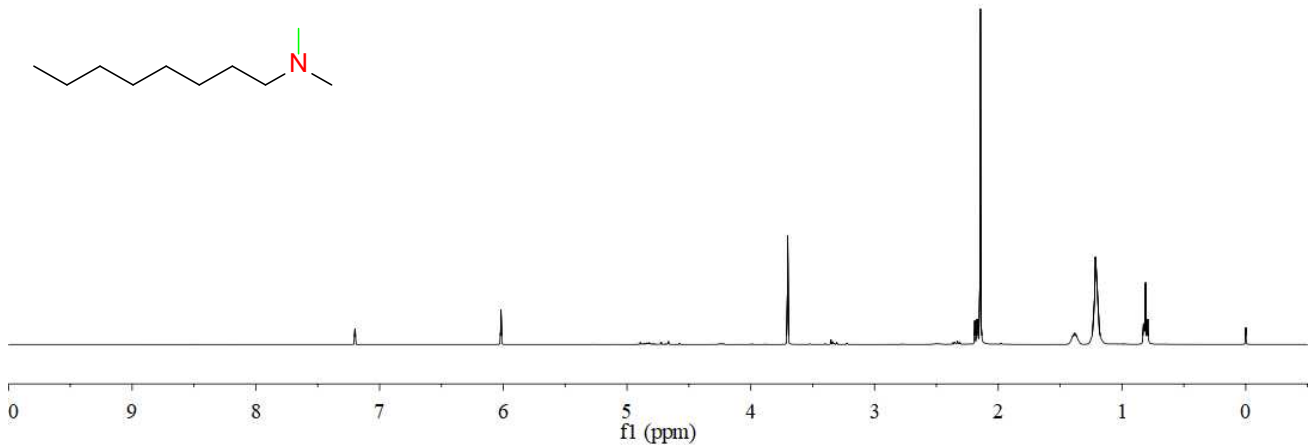

RT: 0.00 - 25.09

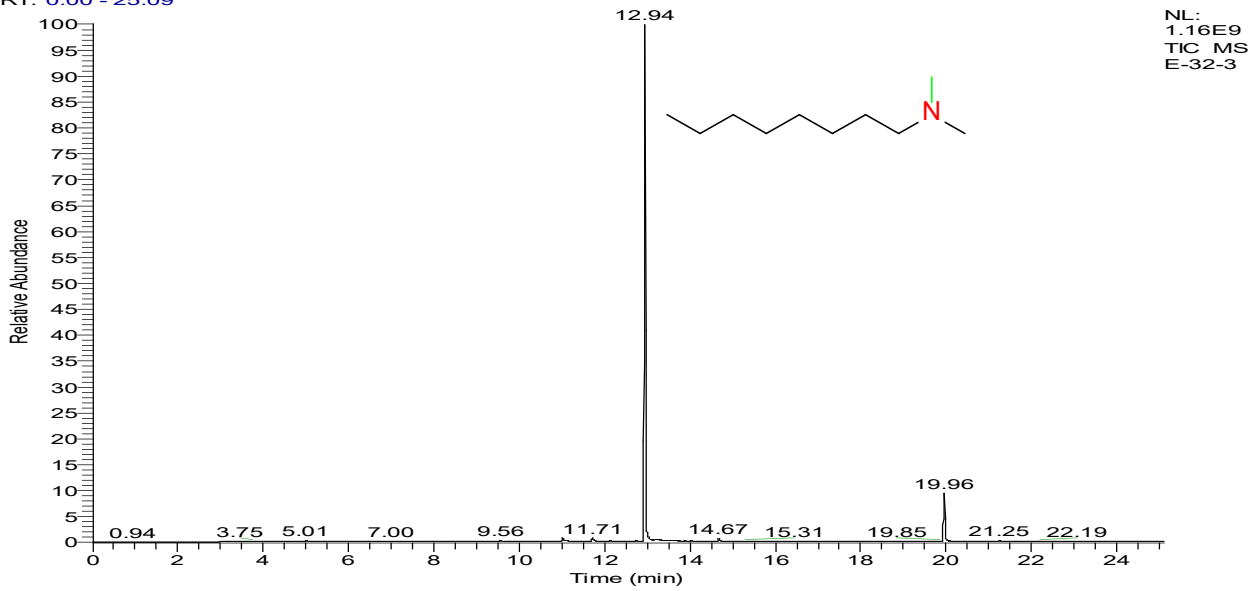

E-32-3 #3796 RT: 12.94 AV: 1 NL: 8.67E8  
T: + c EI Full ms [15.00-400.00]

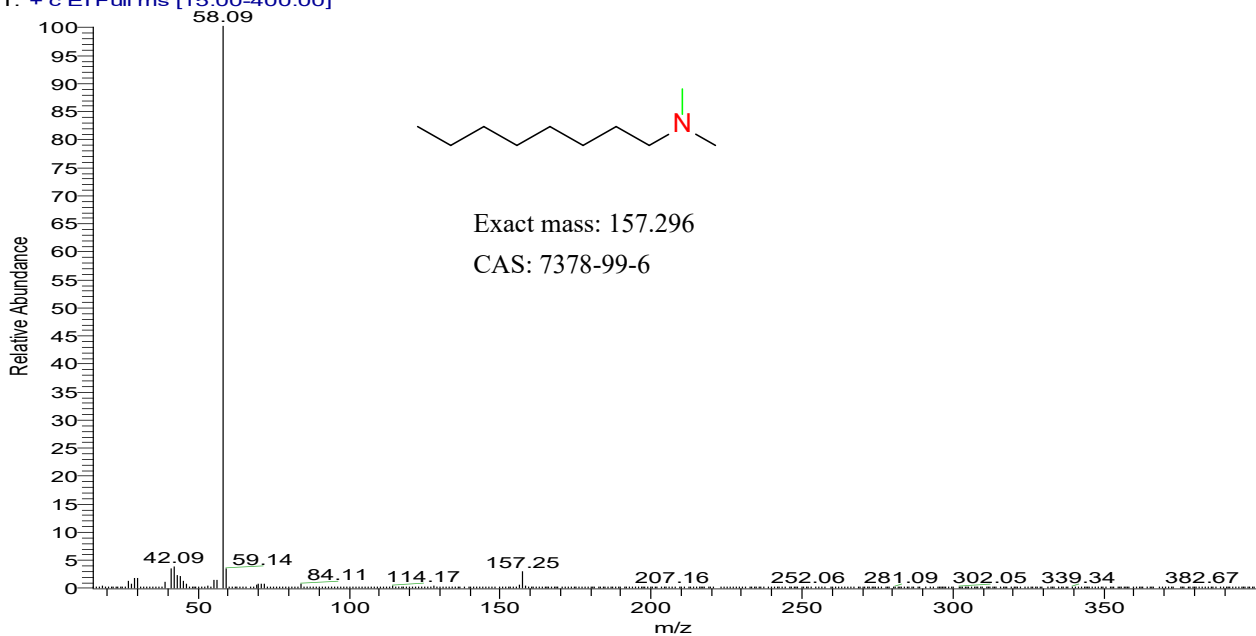

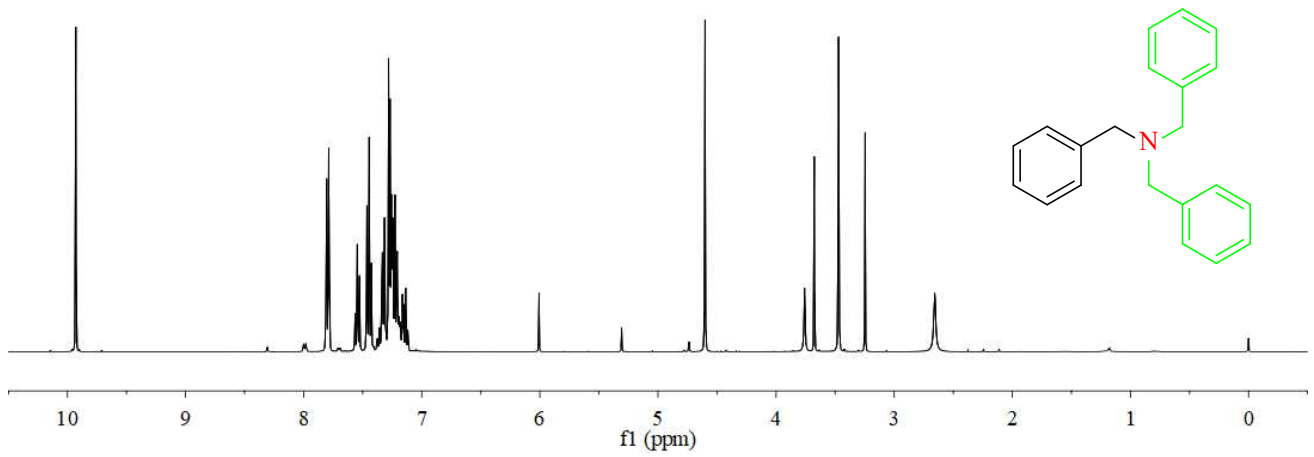

RT: 0.00 - 32.11

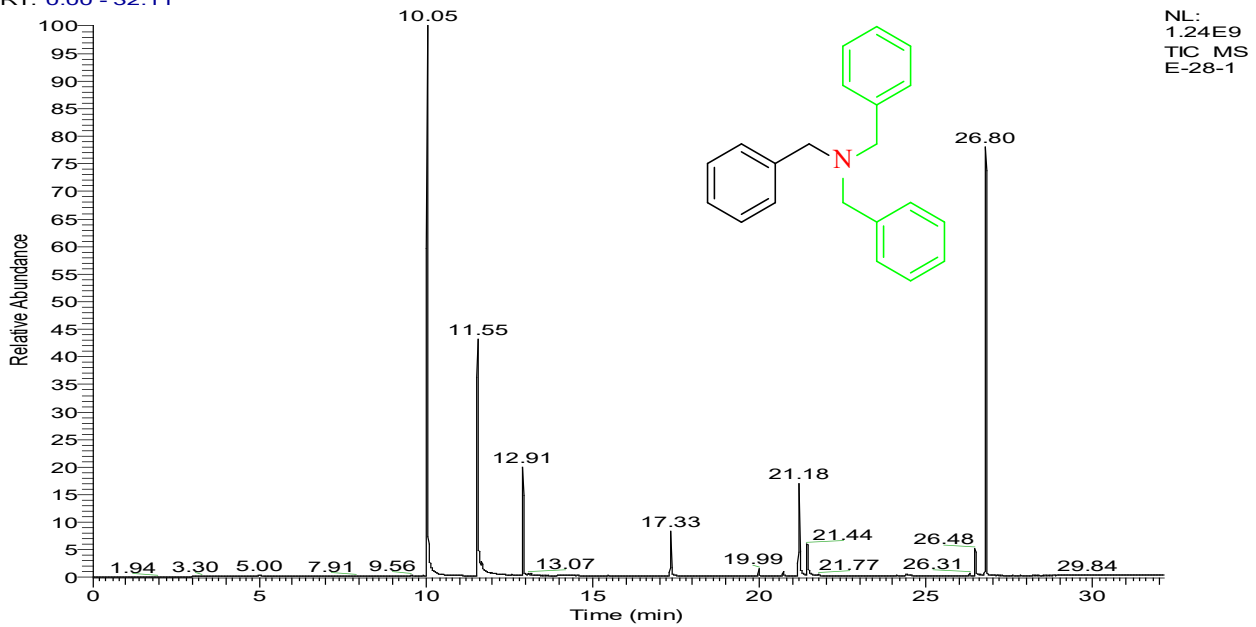

E-28-1 #7869 RT: 26.80 AV: 1 NL: 4.73E8  
T: + c EI Full ms [10.00-400.00]

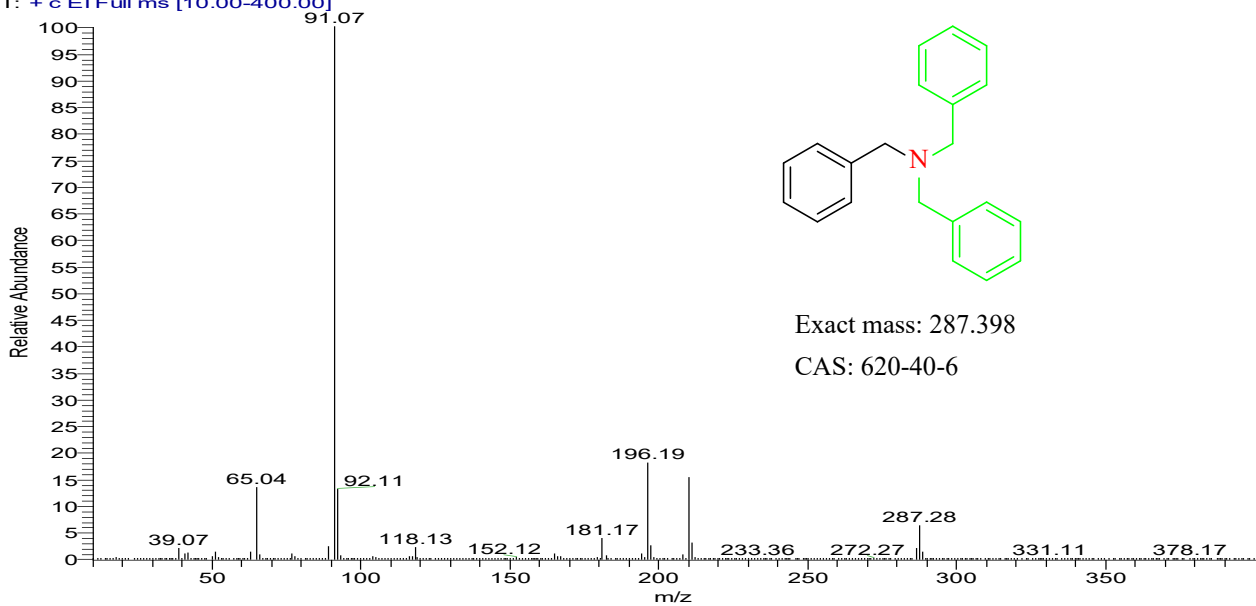

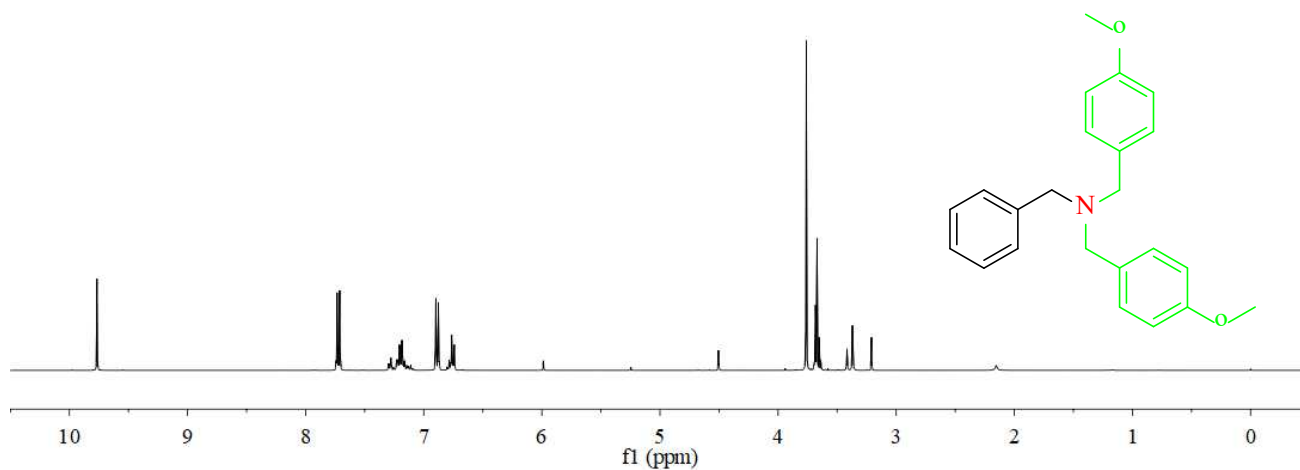

RT: 0.00 - 32.10

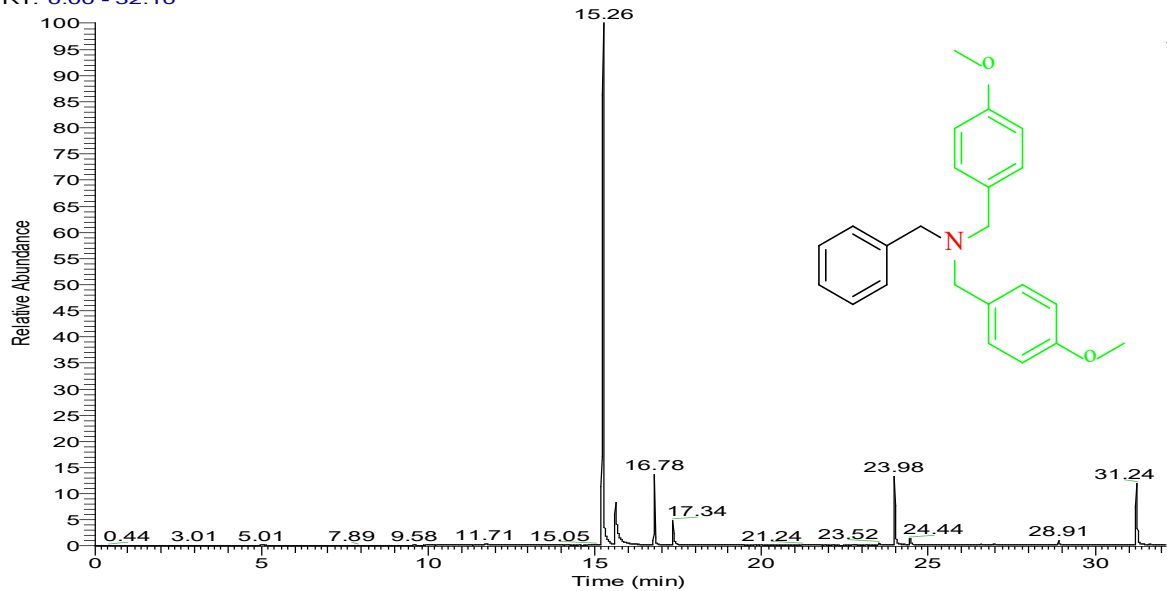E-28-2 #9175 RT: 31.24 AV: 1 NL: 1.12E8  
T: + c EI Full ms [10.00-400.00]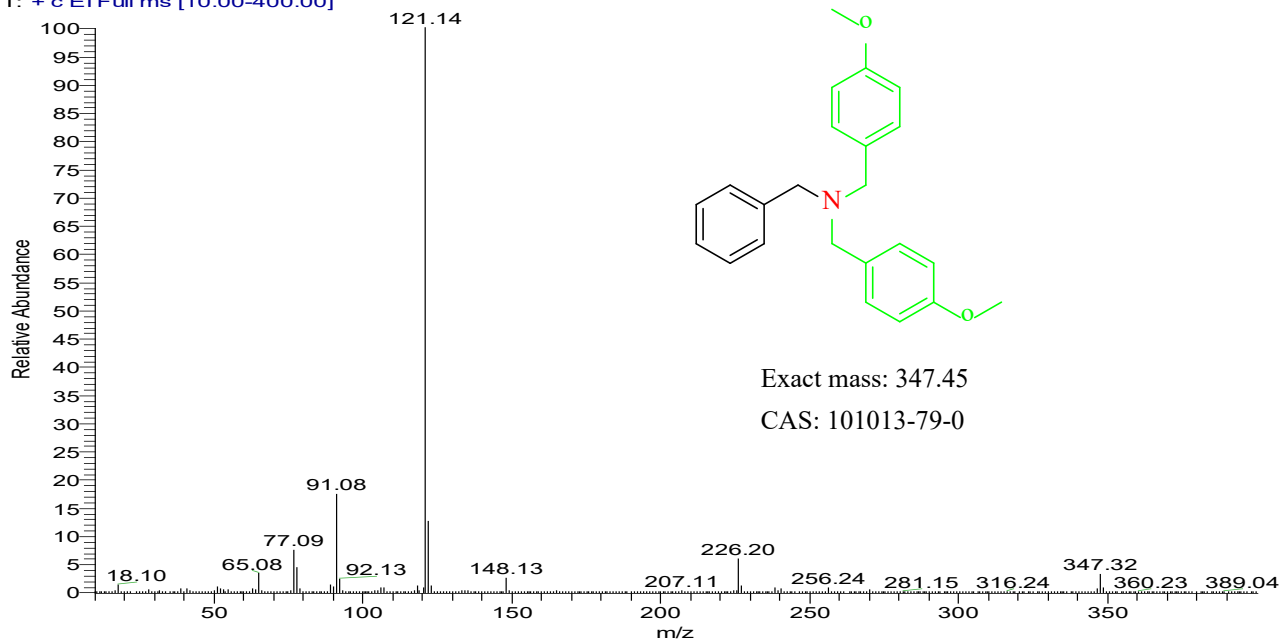

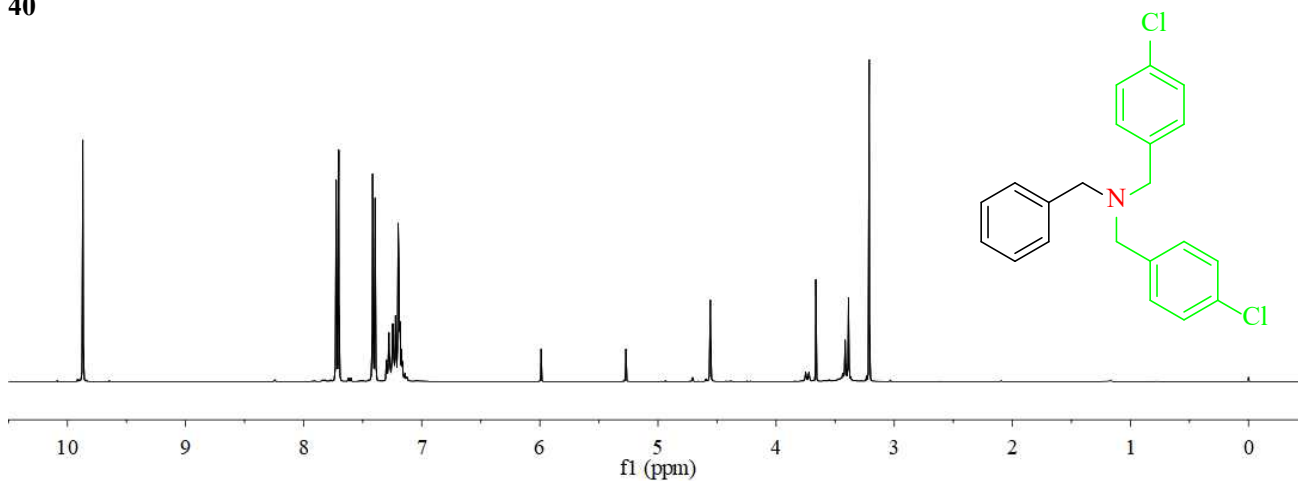

RT: 0.00 - 32.12

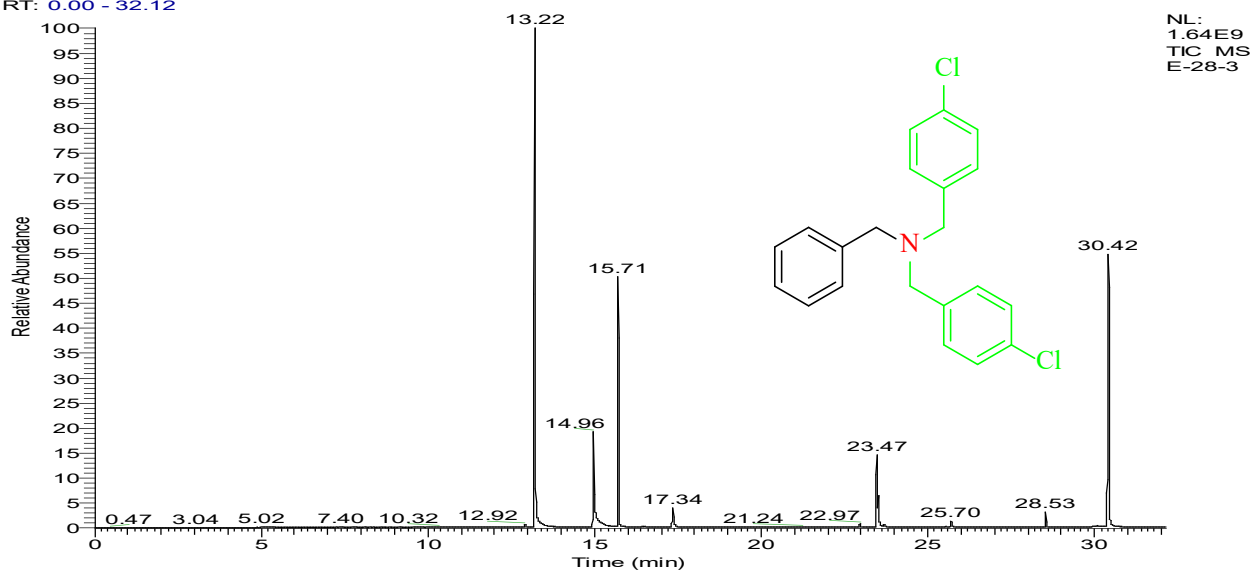E-28-3 #8936 RT: 30.42 AV: 1 NL: 2.29E8  
T: + c EI Full ms [10.00-400.00]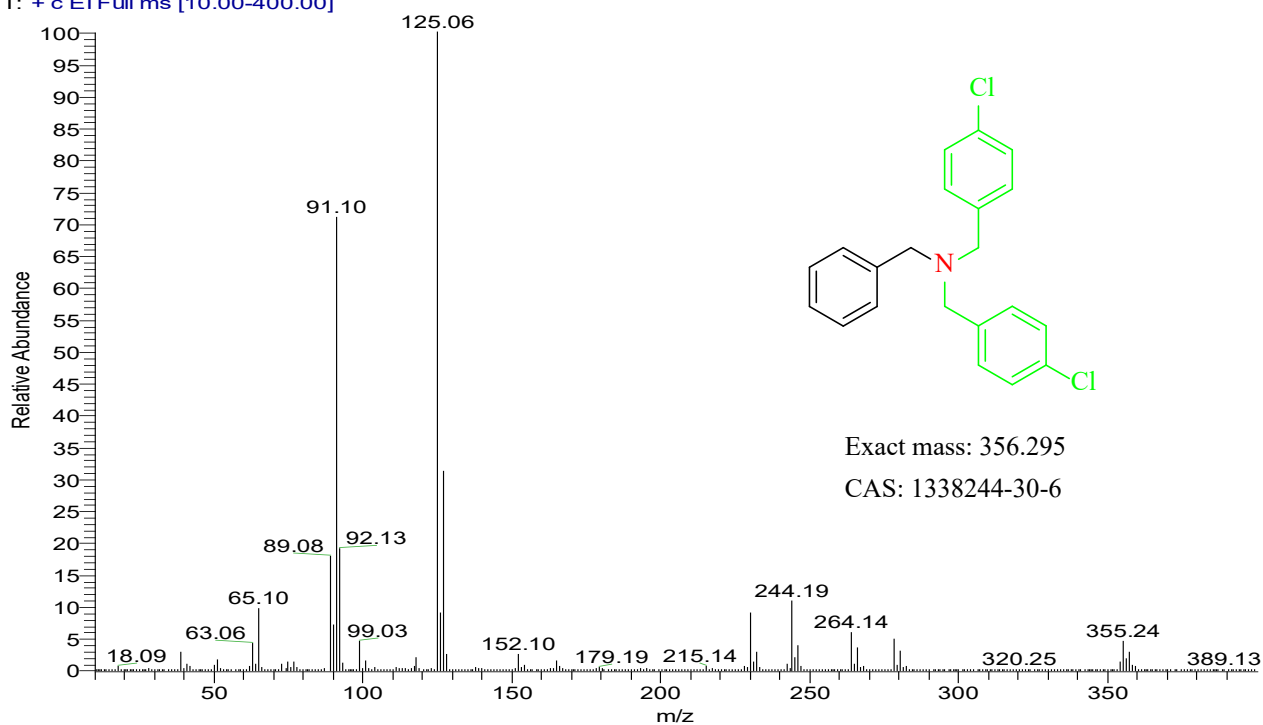

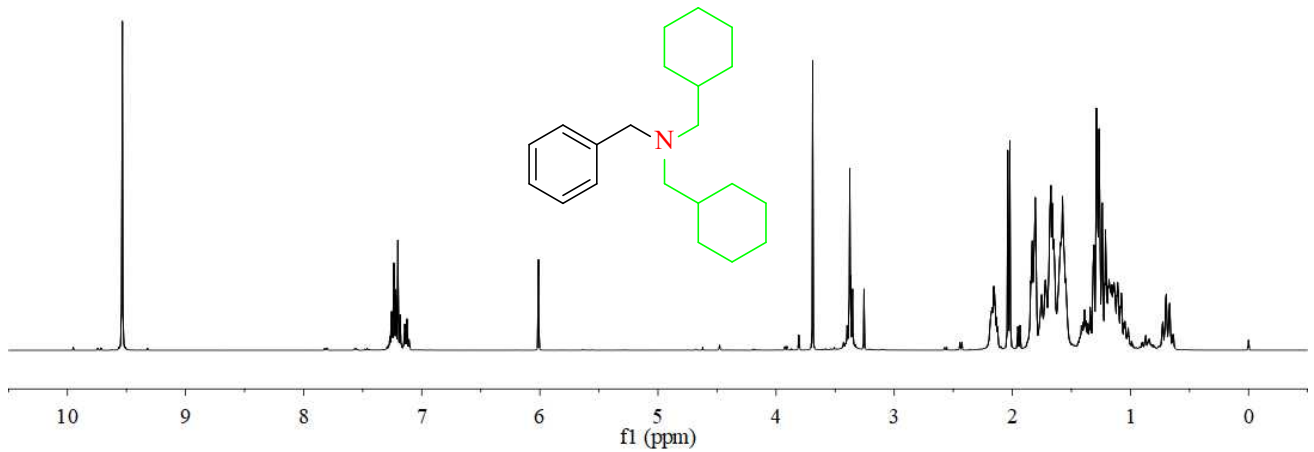

RT: 0.00 - 32.11

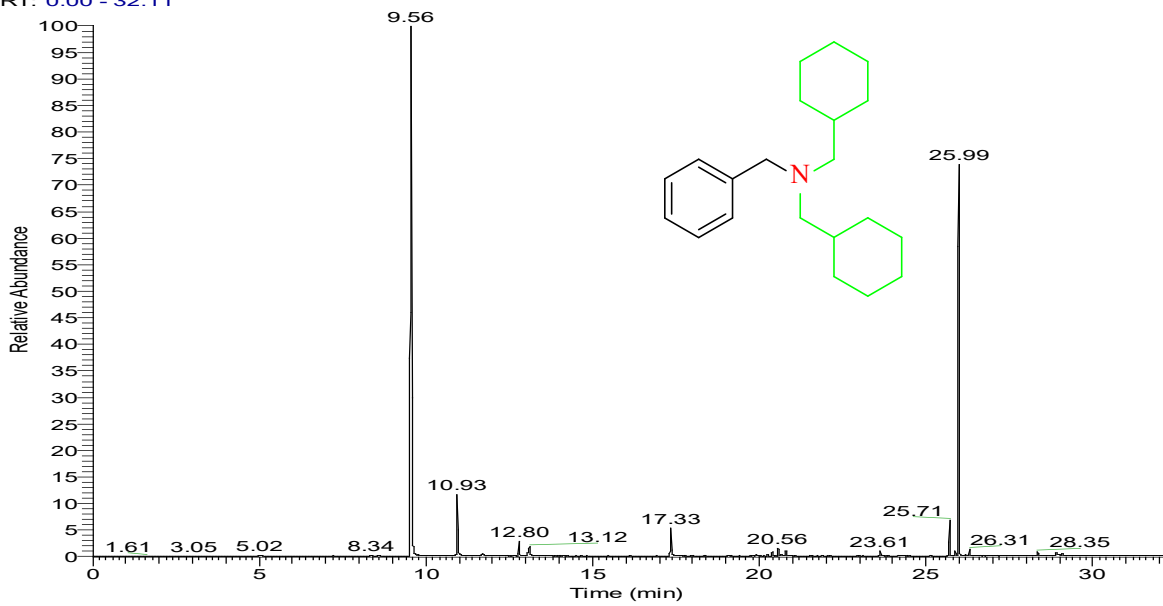

NL:  
1.98E9  
TIC MS  
E-28-6

E-28-6 #7631 RT: 25.99 AV: 1 NL: 4.49E8  
T: + c EI Full ms [10.00-400.00]

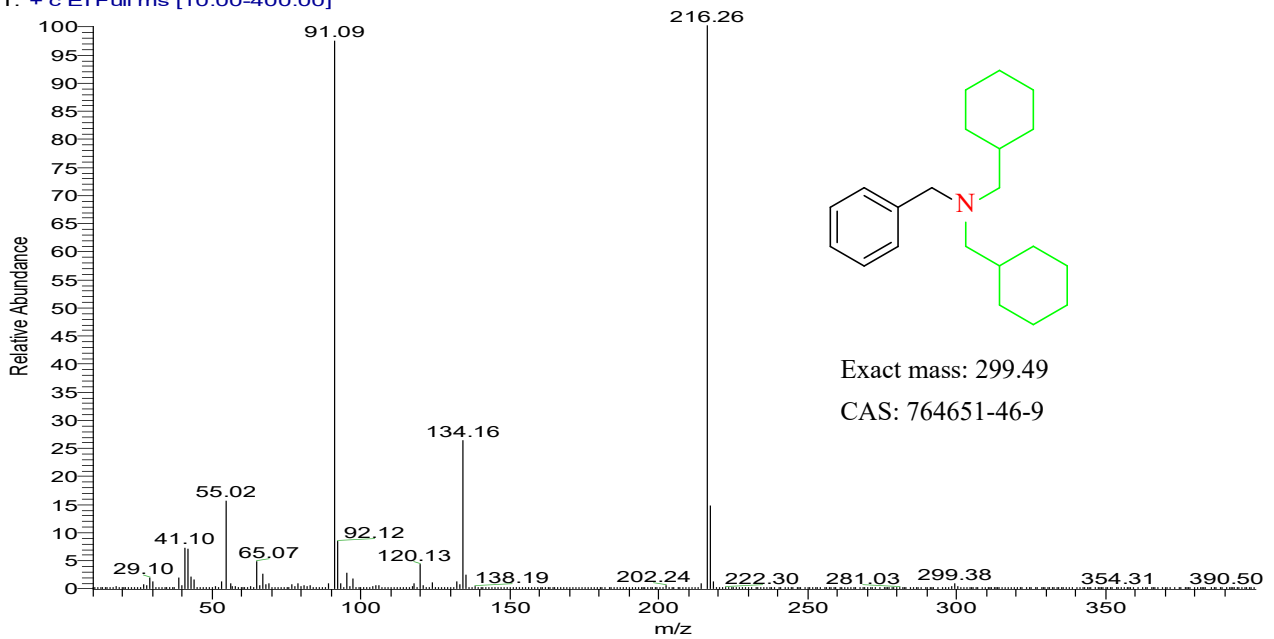

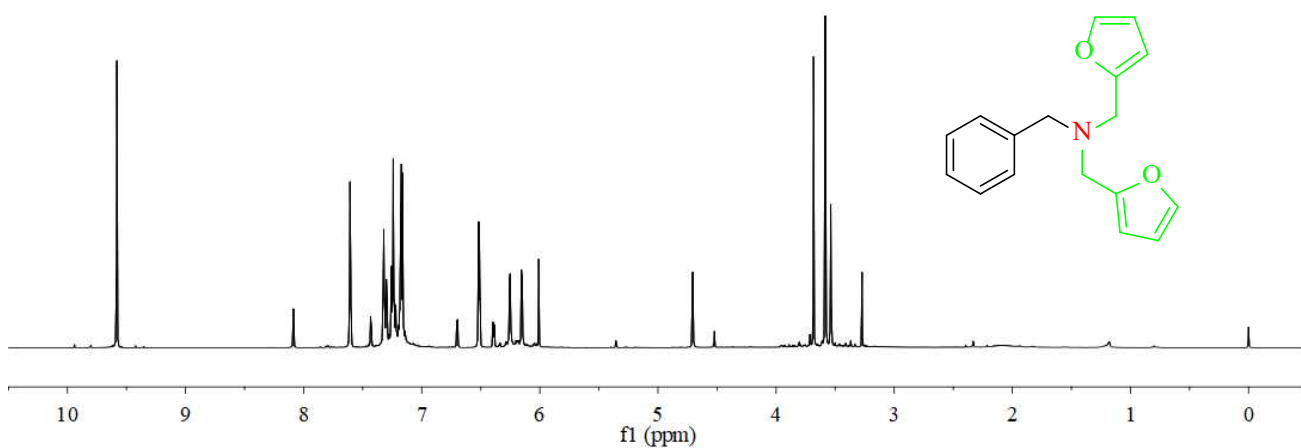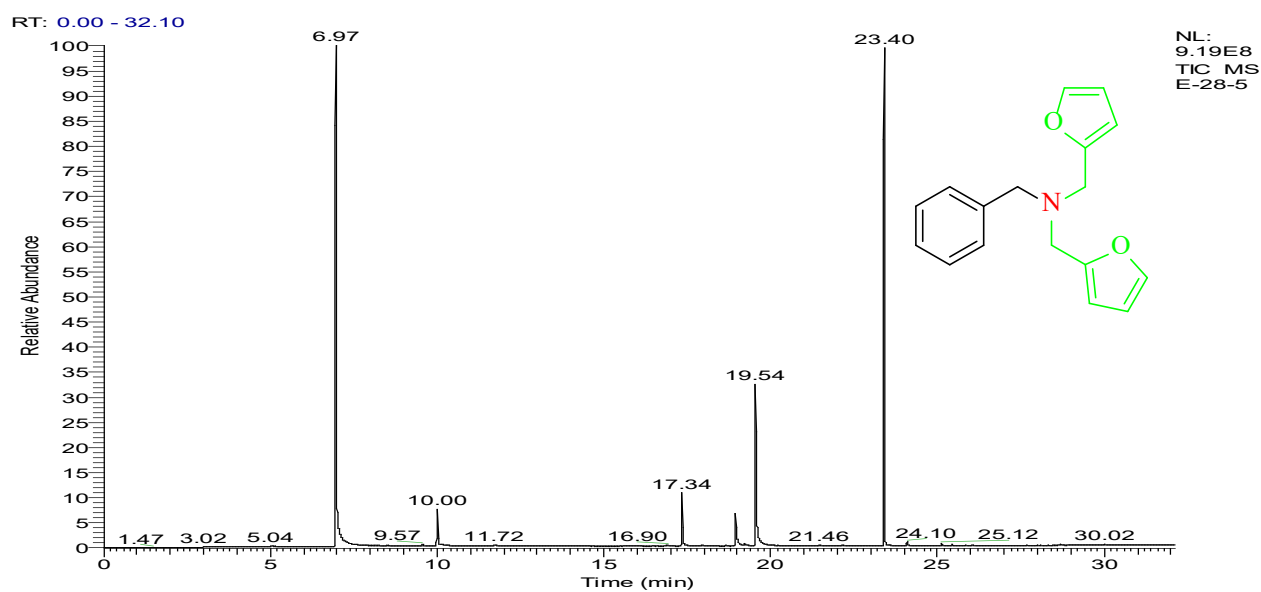

E-28-5 #6870 RT: 23.40 AV: 1 NL: 3.01E8  
T: + c EI Full ms [10.00-400.00]

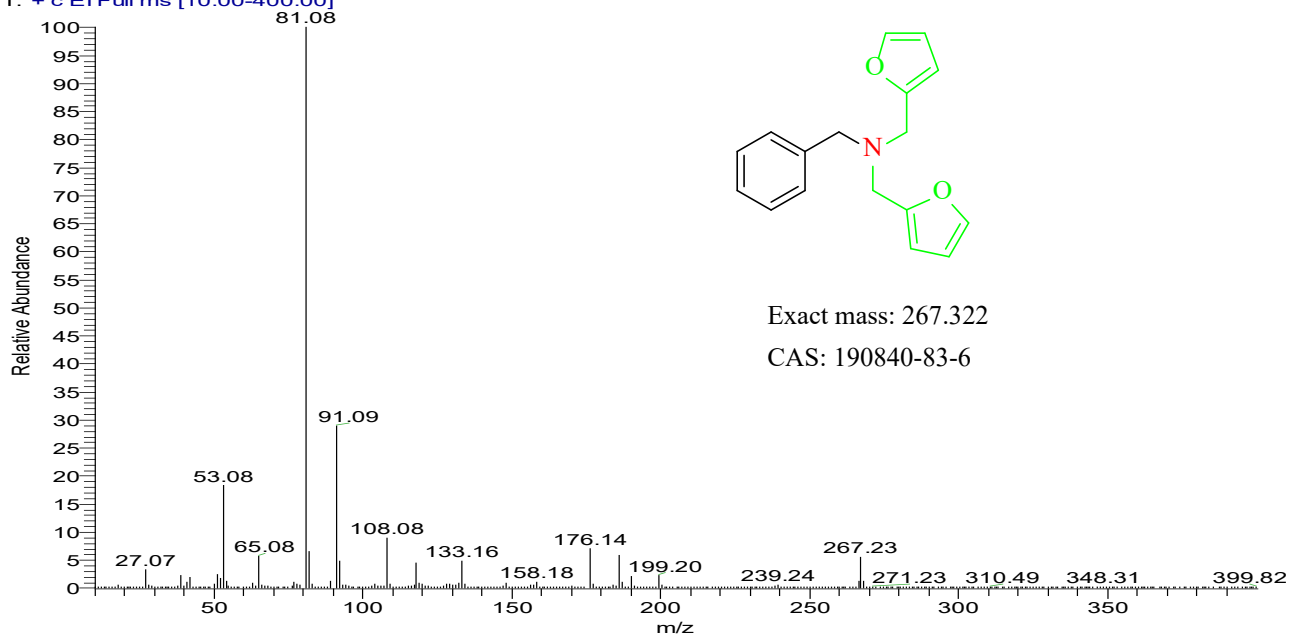



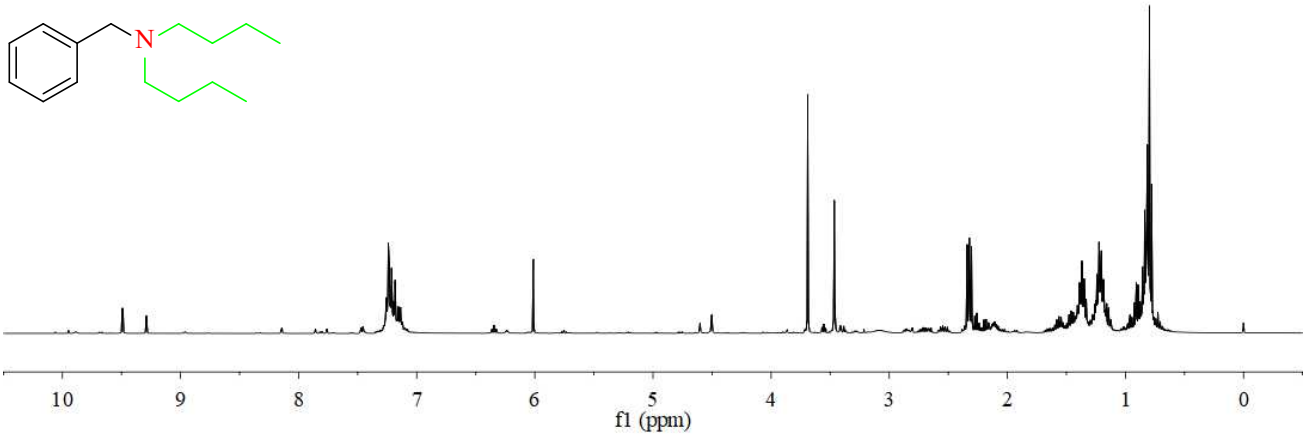

RT: 0.00 - 32.11

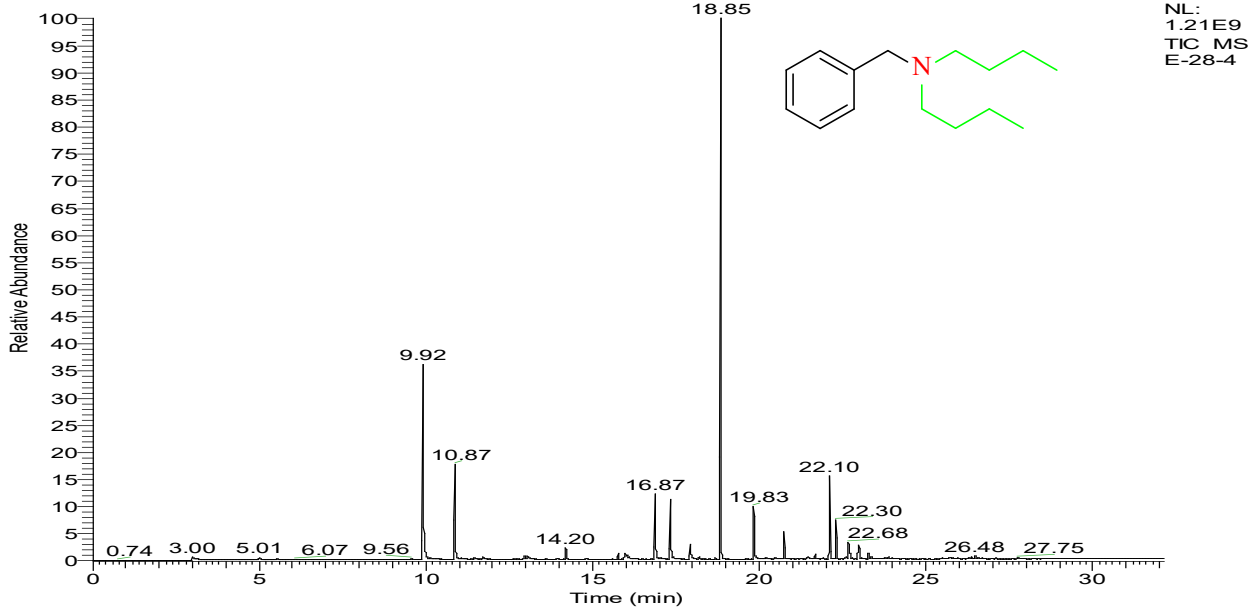E-28-4 #5532 RT: 18.85 AV: 1 NL: 5.71E8  
T: + c EI Full ms [10.00-400.00]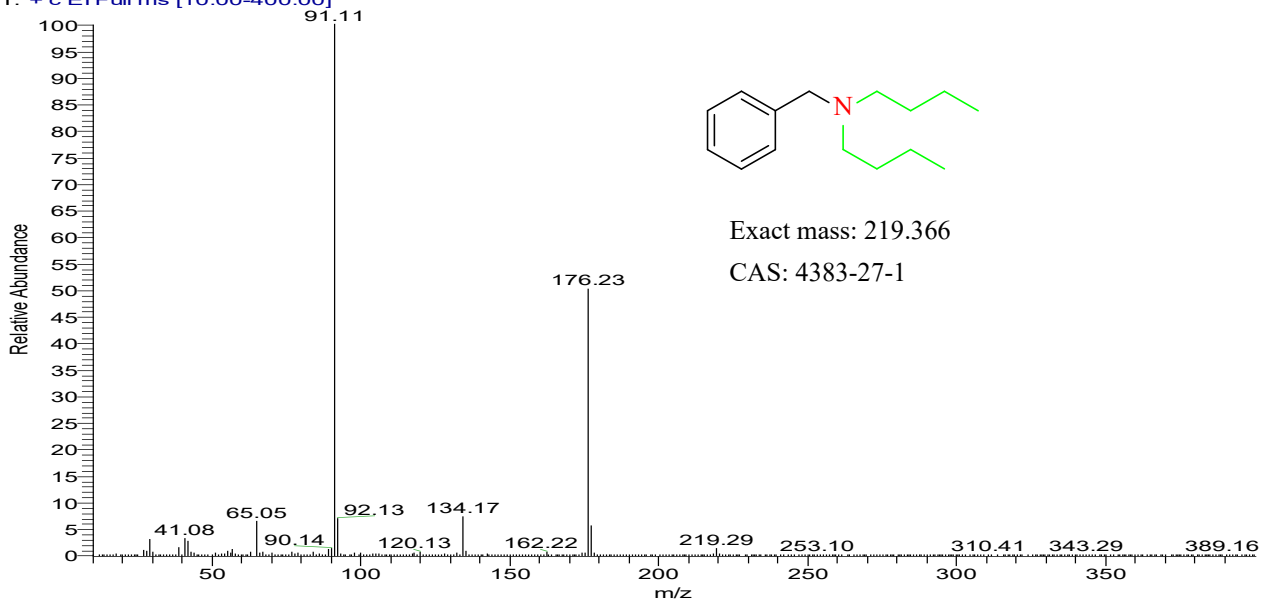

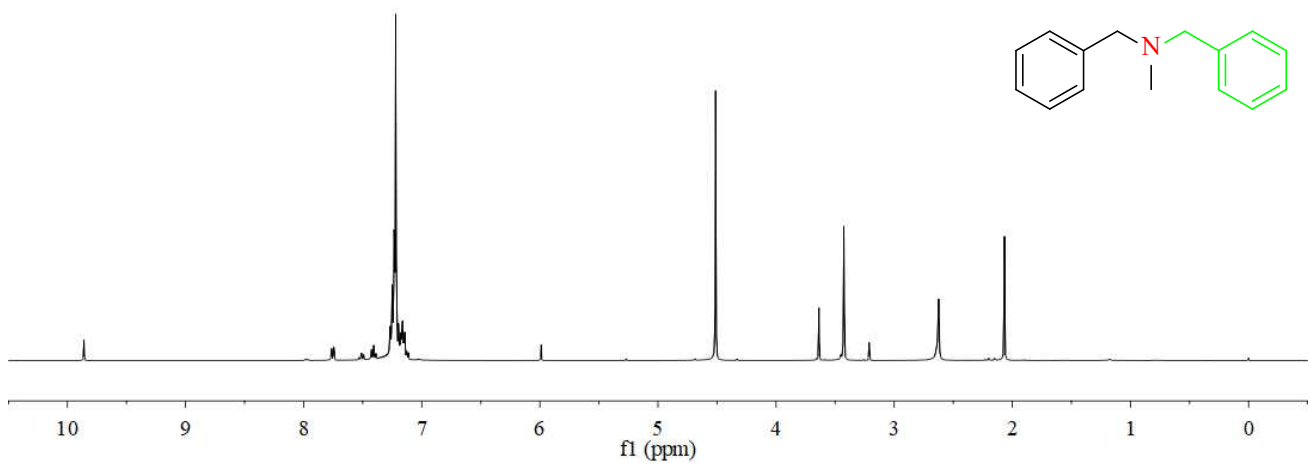

RT: 0.00 - 32.09

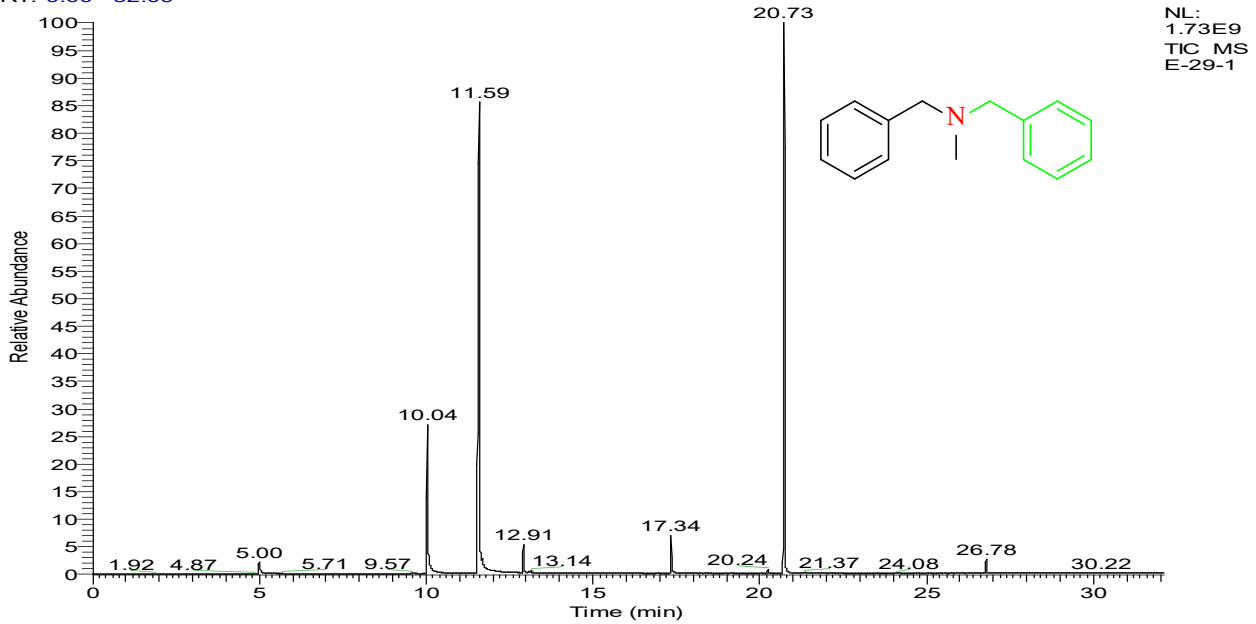

E-29-1 #6085 RT: 20.73 AV: 1 NL: 6.59E8  
T: + c EI Full ms [10.00-400.00]

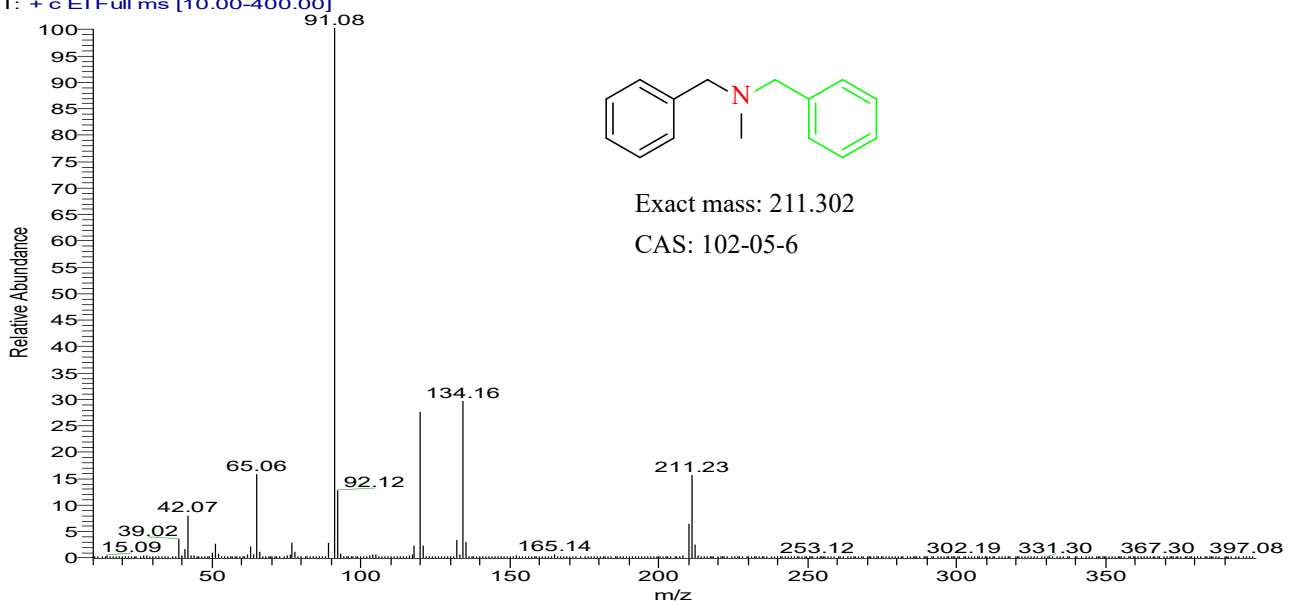

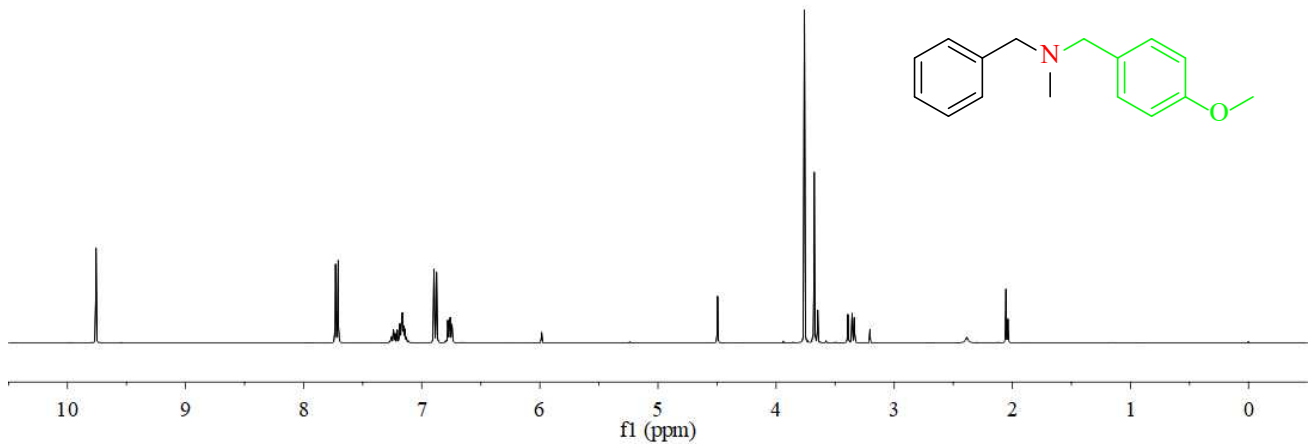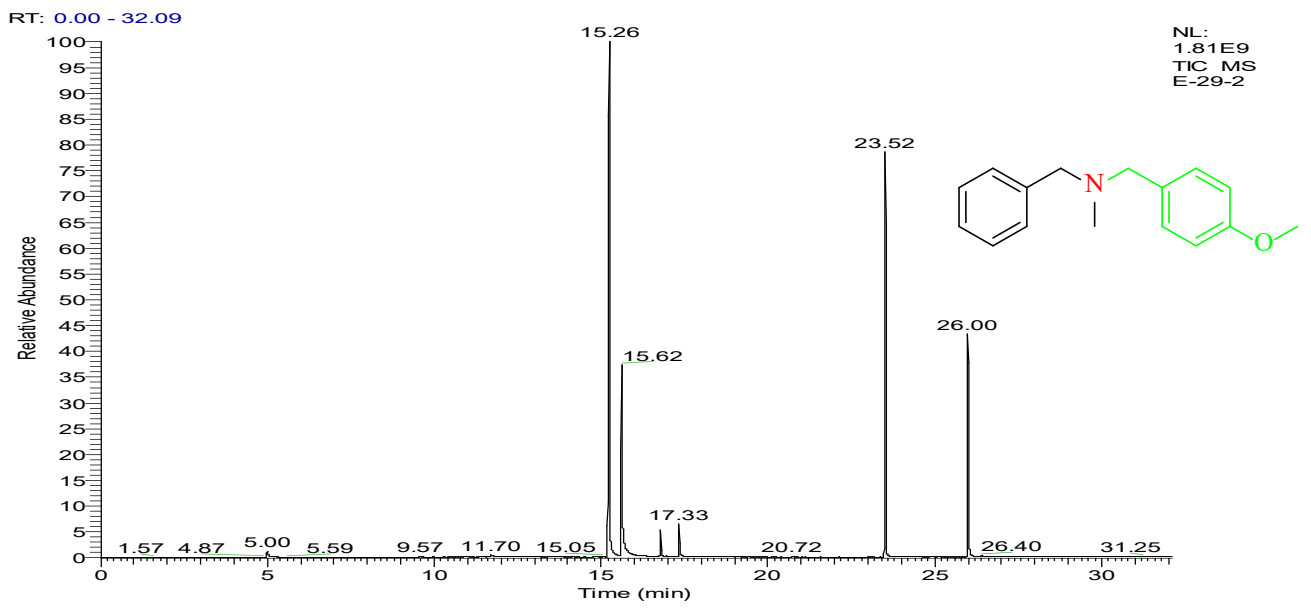

E-29-2 #6907 RT: 23.52 AV: 1 NL: 4.96E8  
T: + c EI Full ms [10.00-400.00]

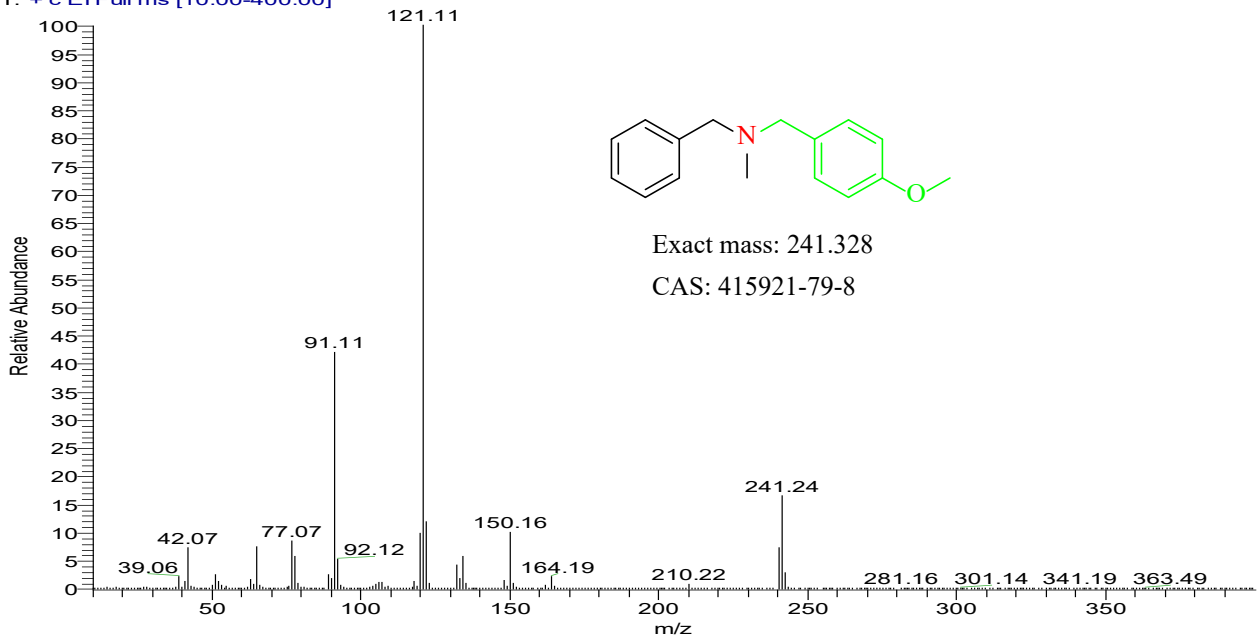

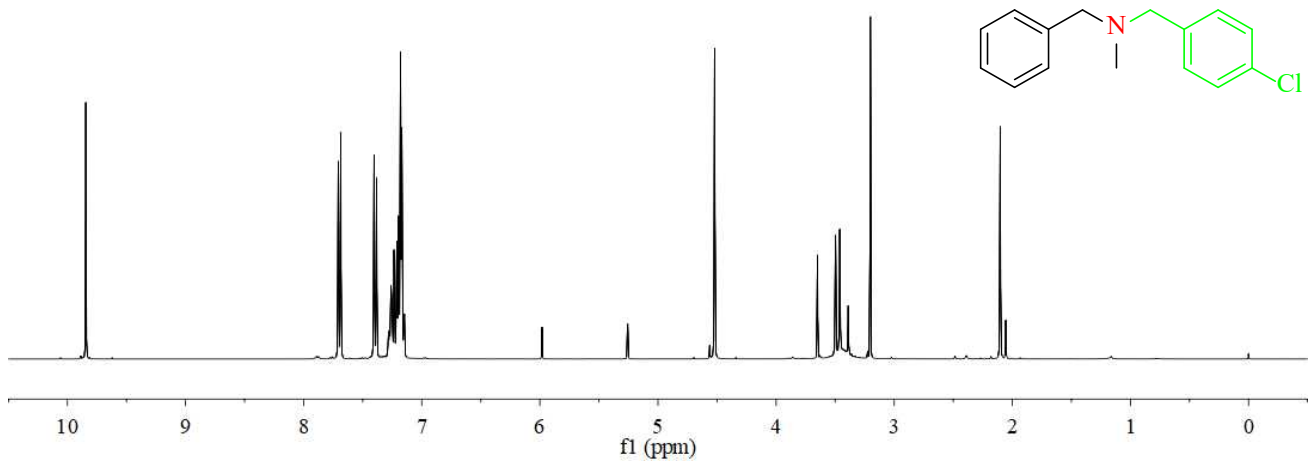

RT: 0.00 - 32.09

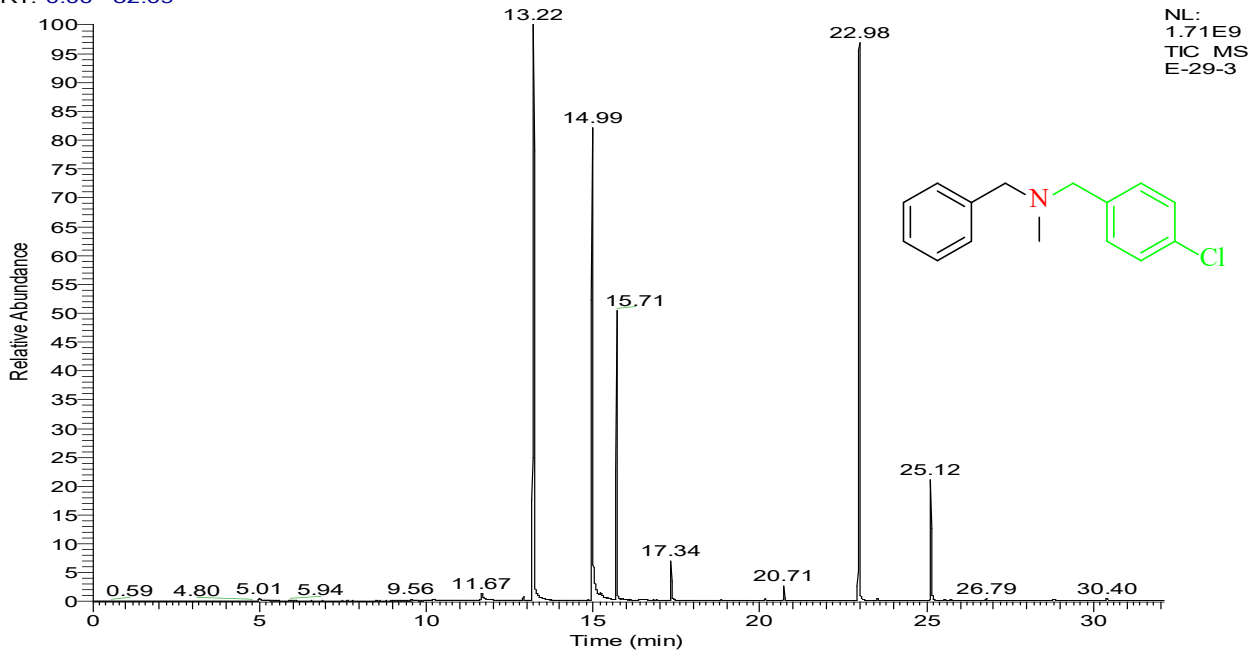

E-29-3 #6748 RT: 22.98 AV: 1 NL: 3.24E8  
T: + c EI Full ms [10.00-400.00]

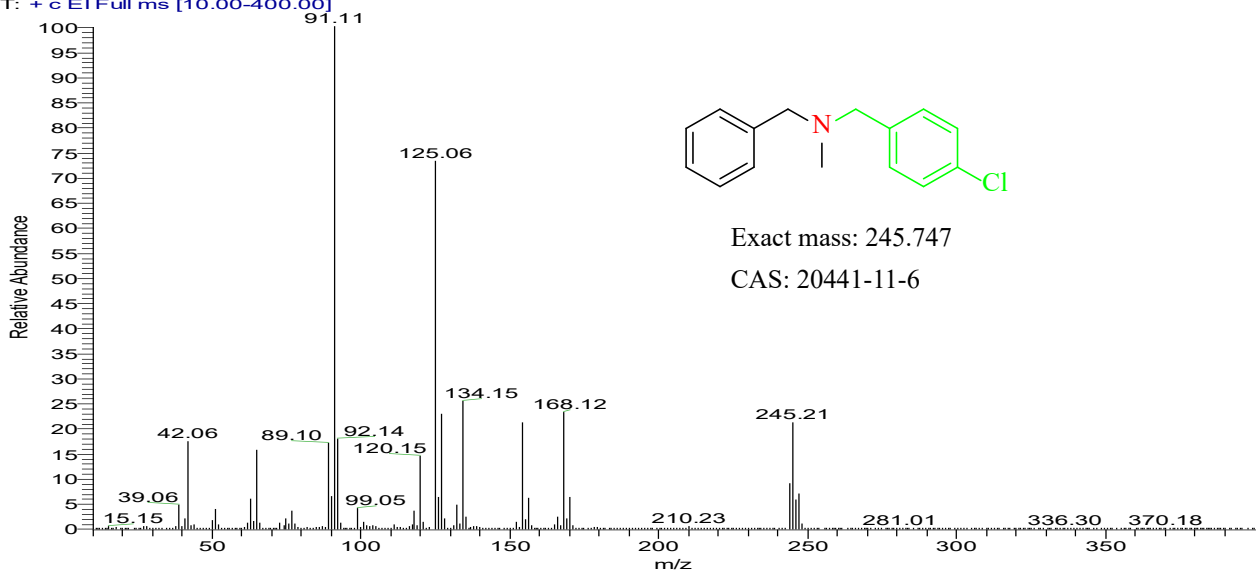

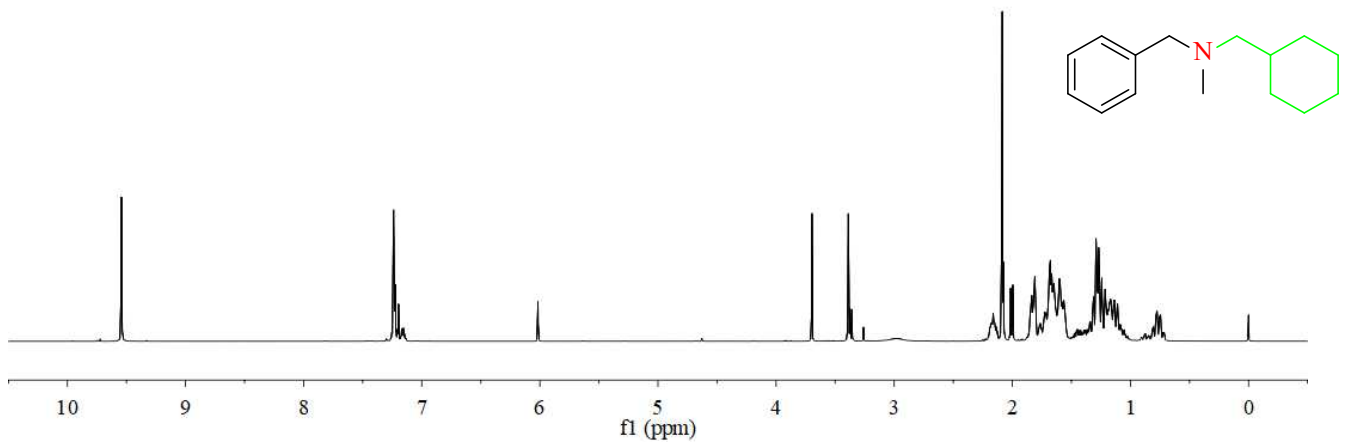

RT: 0.00 - 32.11

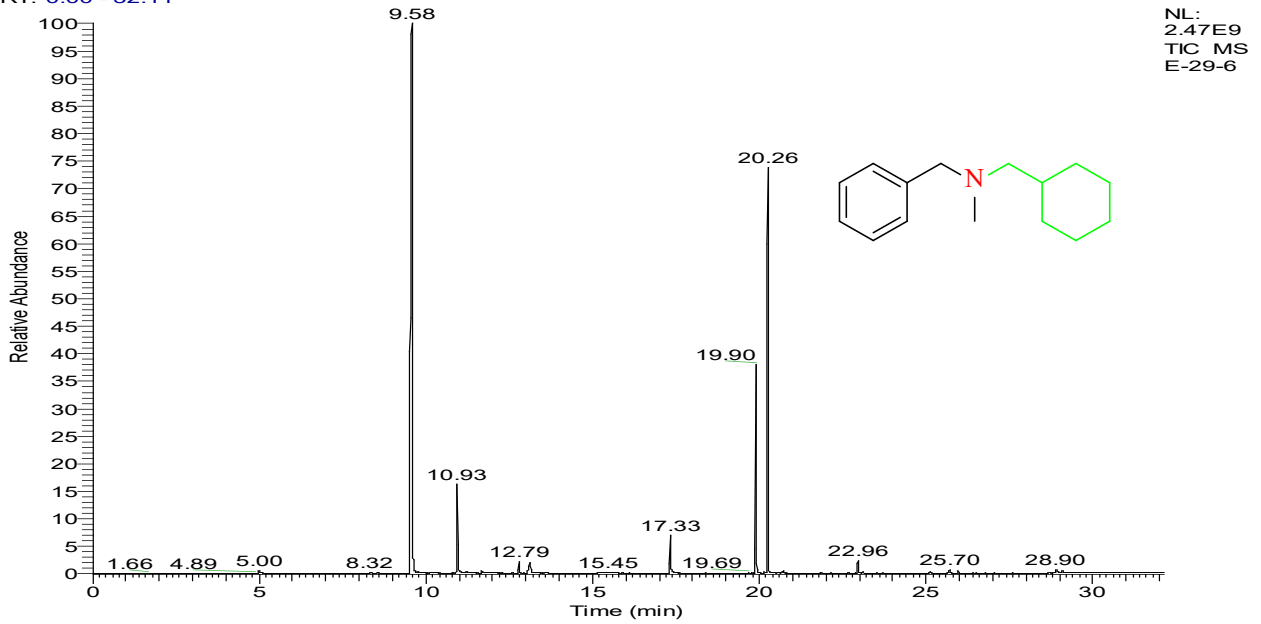

E-29-6 #5947 RT: 20.26 AV: 1 NL: 7.28E8  
T: + c EI Full ms [10.00-400.00]

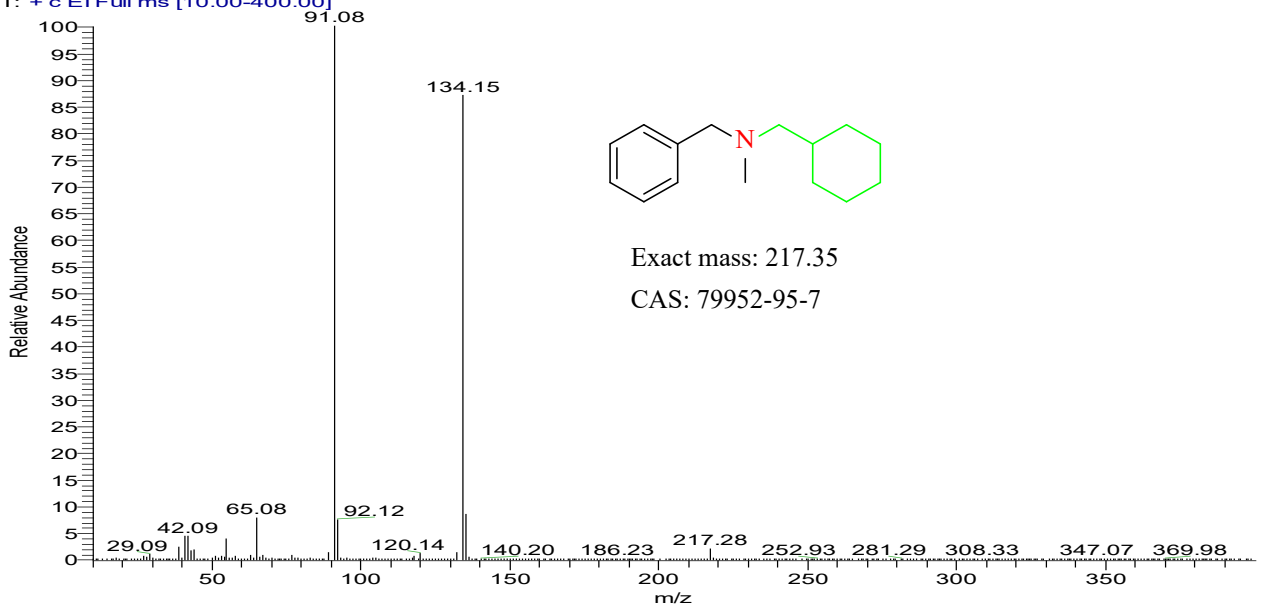

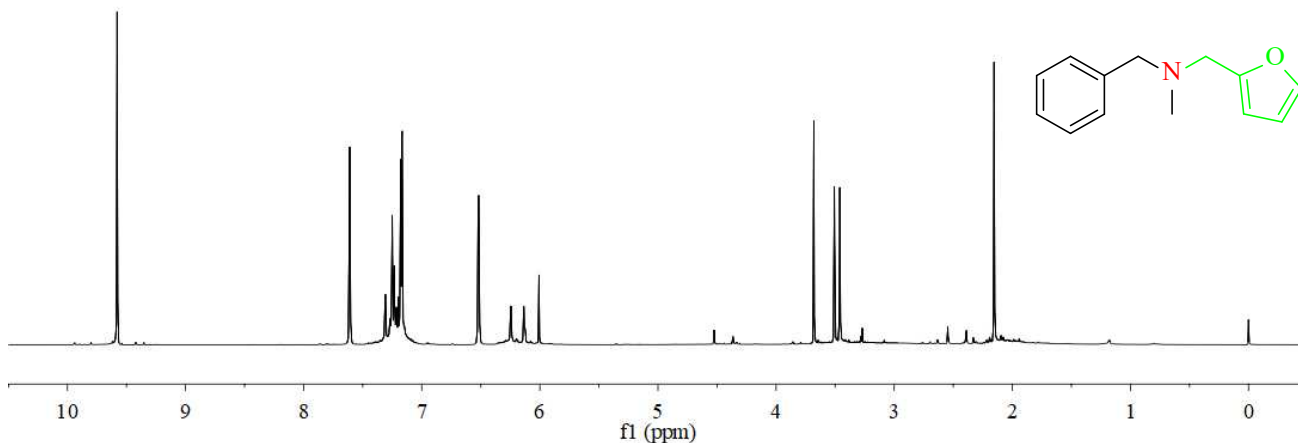

RT: 0.00 - 25.11

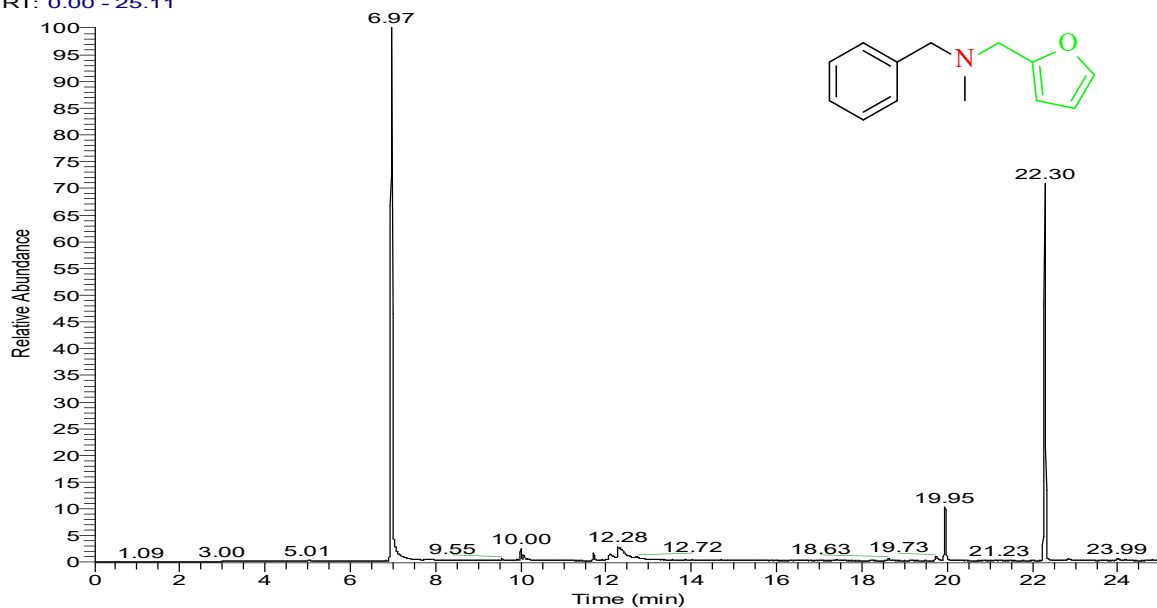

E-29-5 #6546 RT: 22.30 AV: 1 NL: 2.03E8  
T: + c EI Full ms [15.00-400.00]

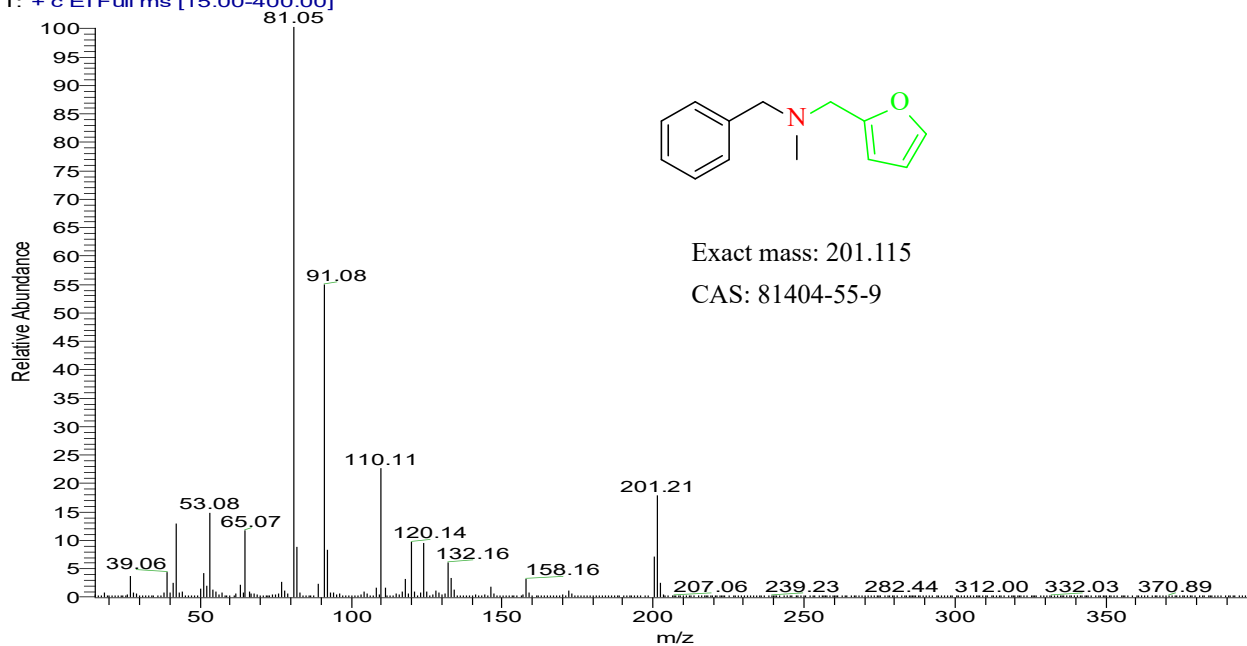

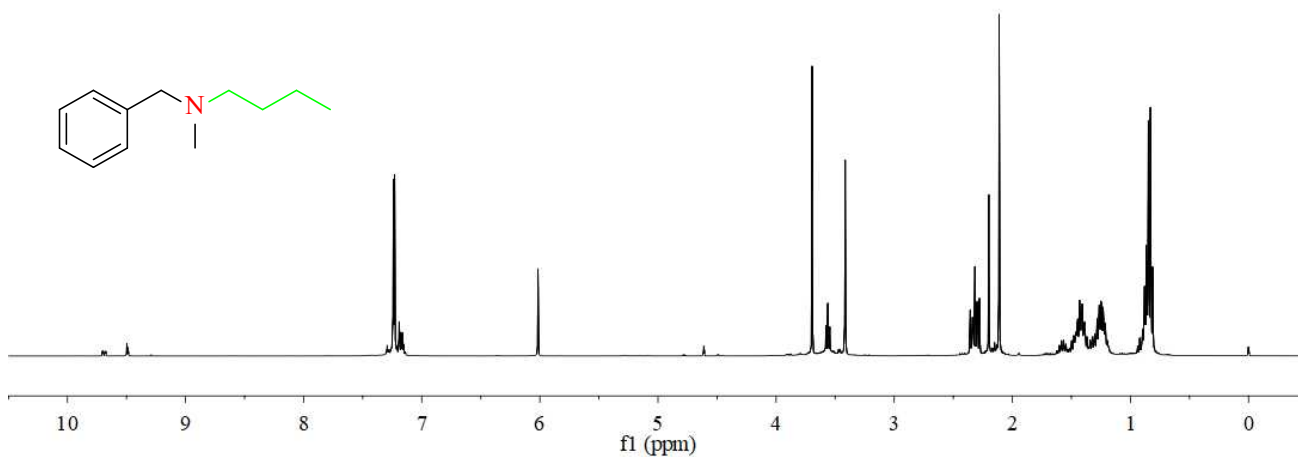

RT: 0.00 - 25.10

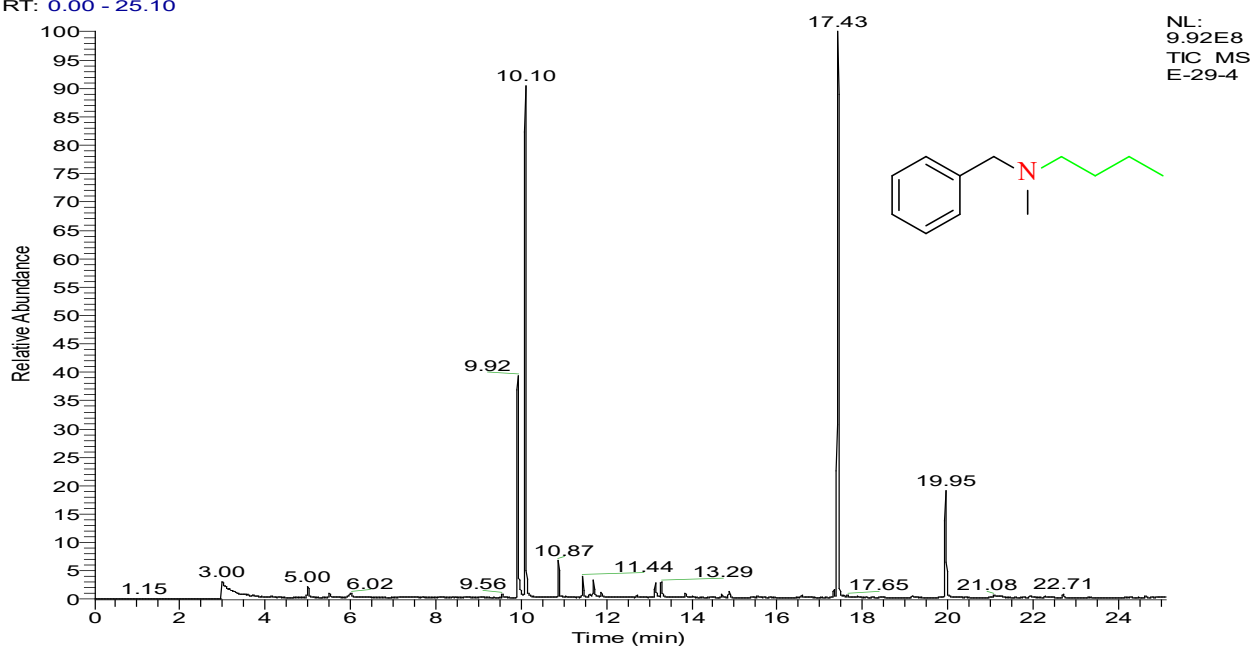

E-29-4 #5116 RT: 17.43 AV: 1 NL: 4.92E8  
T: +c EI Full ms [15.00-400.00]

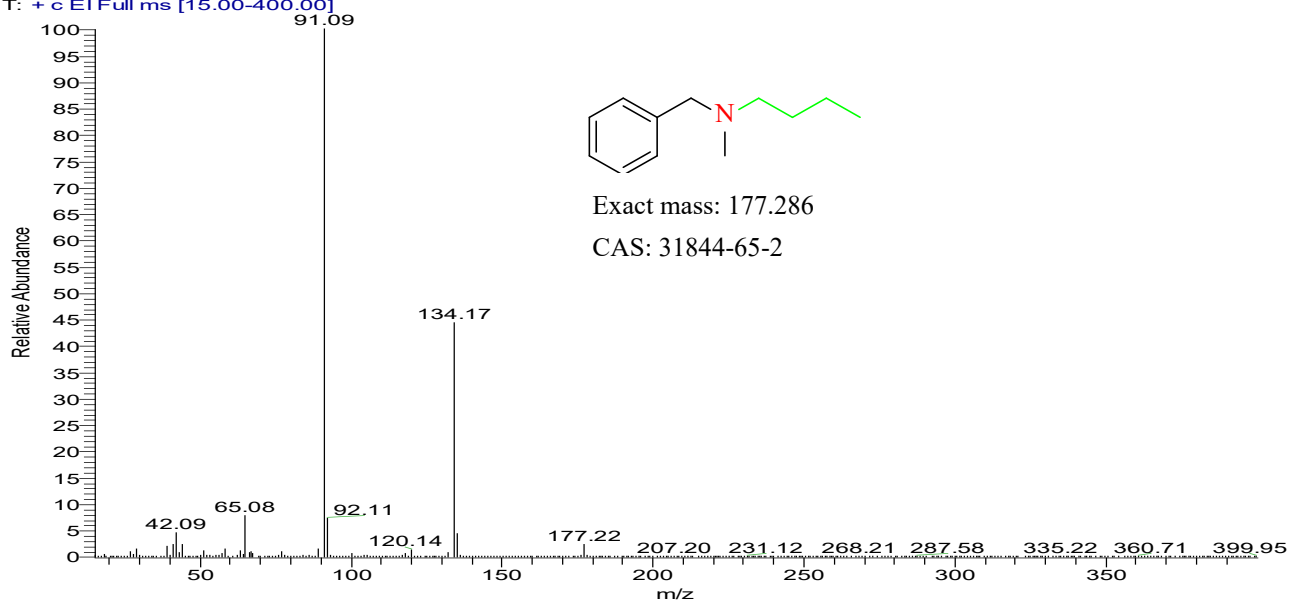

50

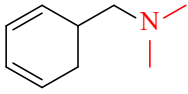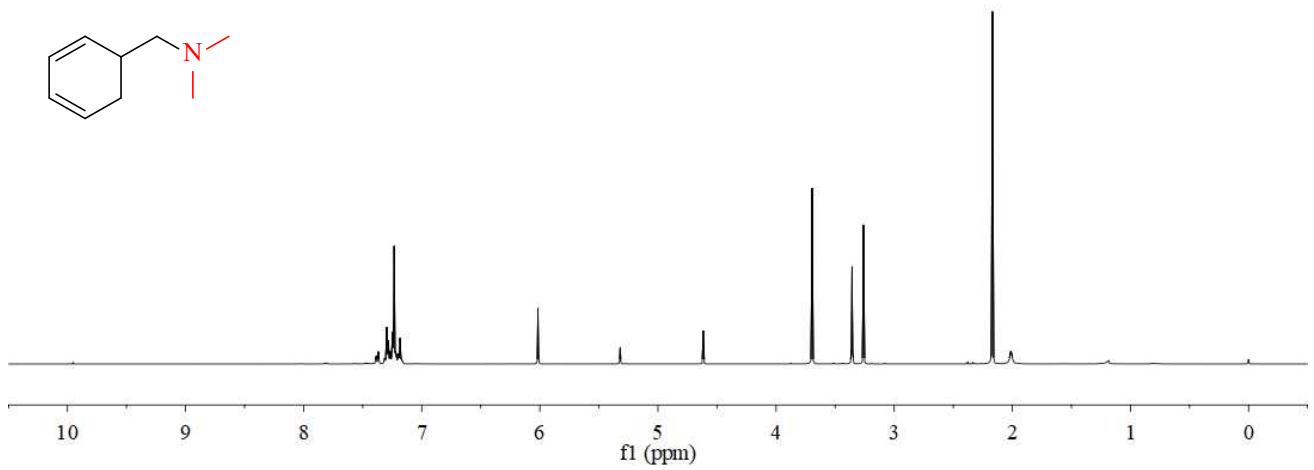

RT: 0.00 - 25.12

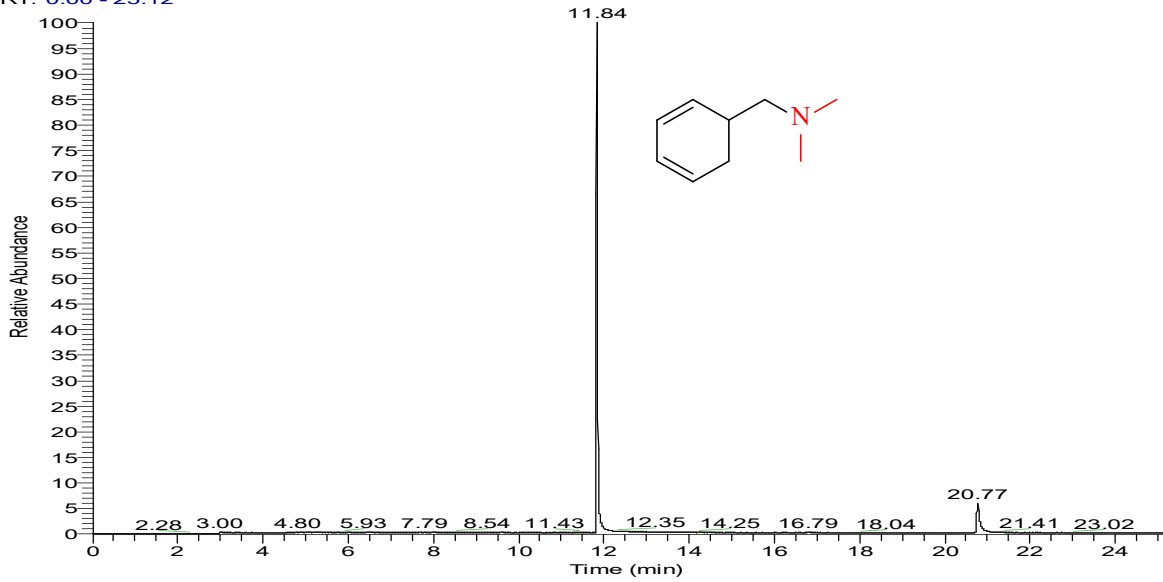

E-44-1 #3472 RT: 11.84 AV: 1 NL: 2.34E8  
T: + c EI Full ms [15.00-400.00]

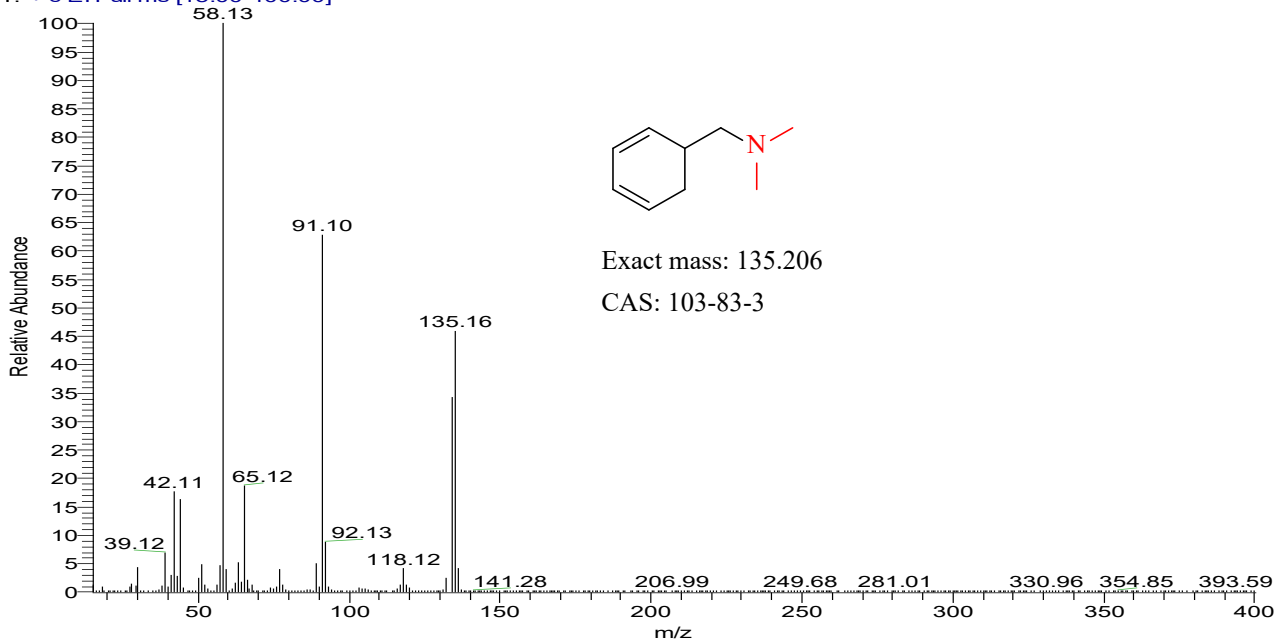



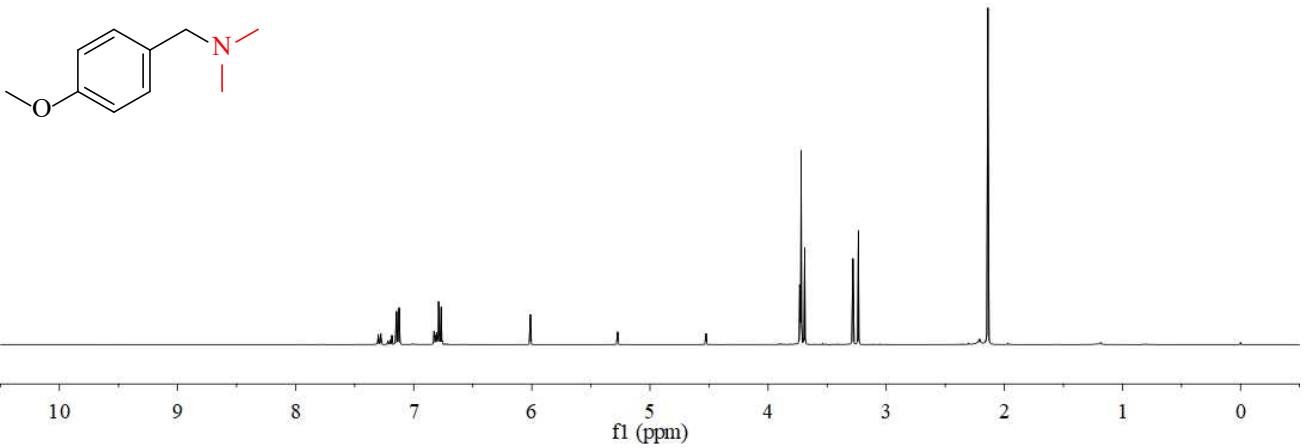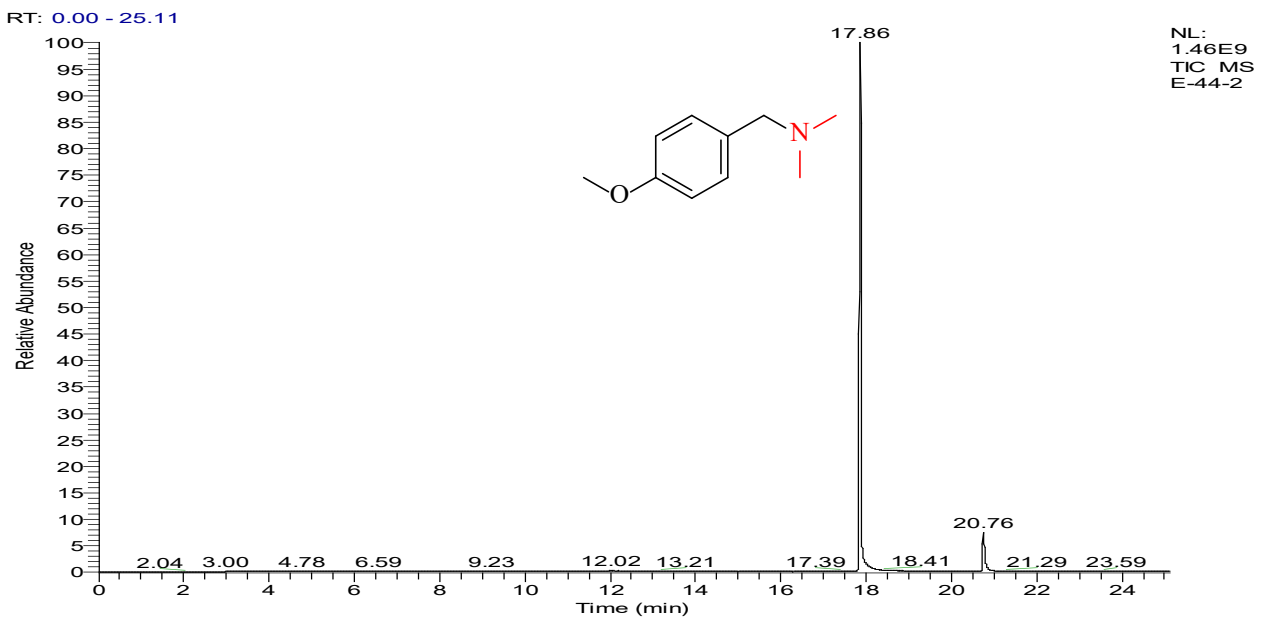

E-44-2 #5242 RT: 17.86 AV: 1 NL: 5.51E8  
 T: + c EI Full ms [15.00-400.00]

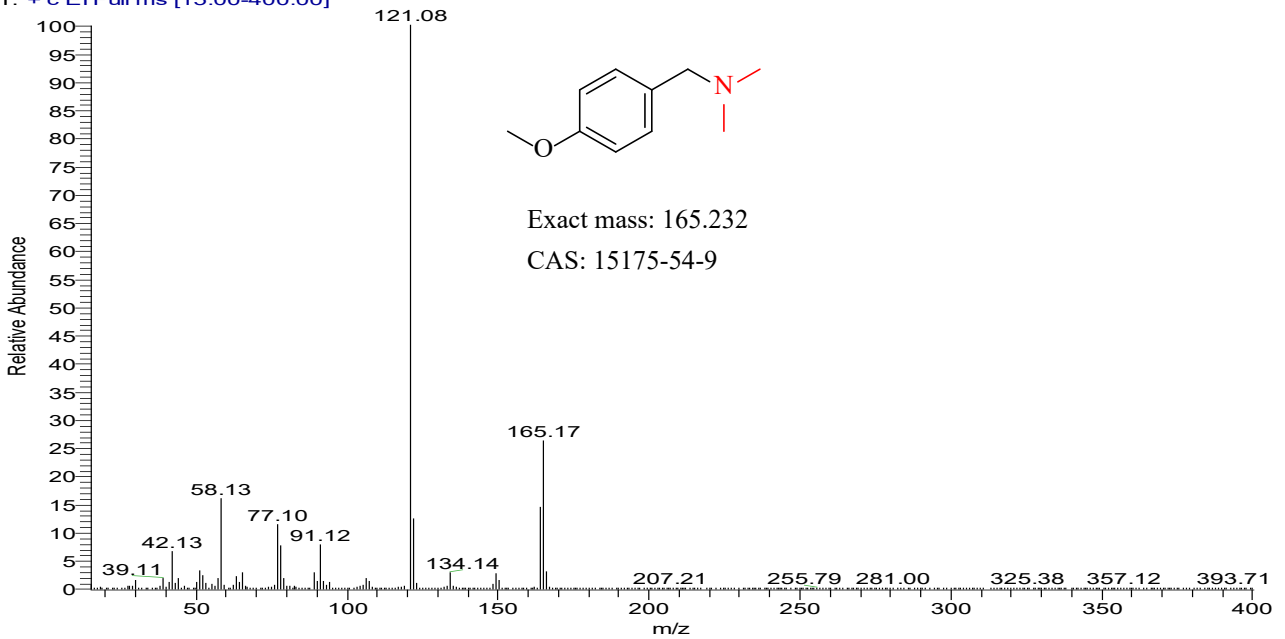

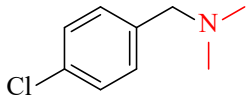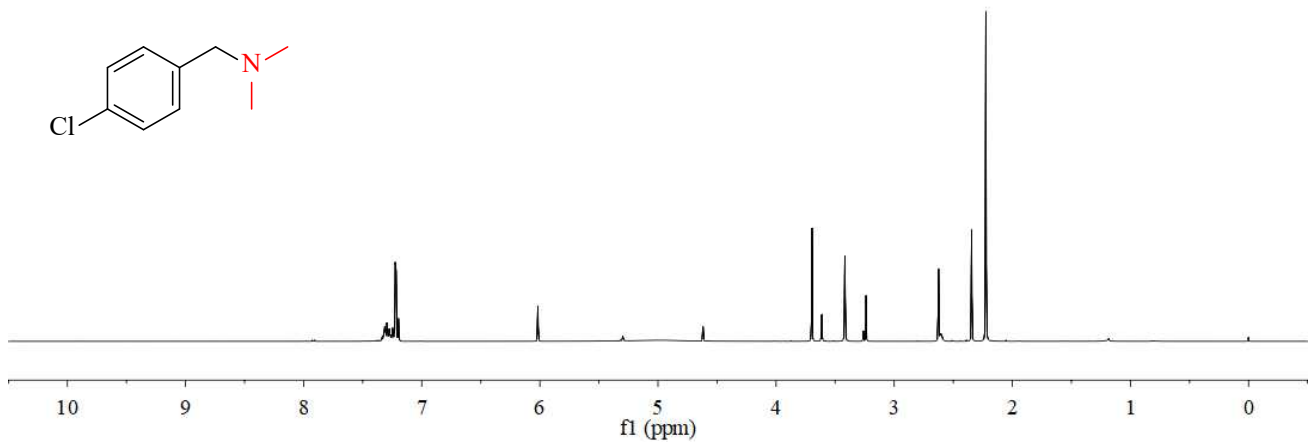

RT: 0.00 - 25.09

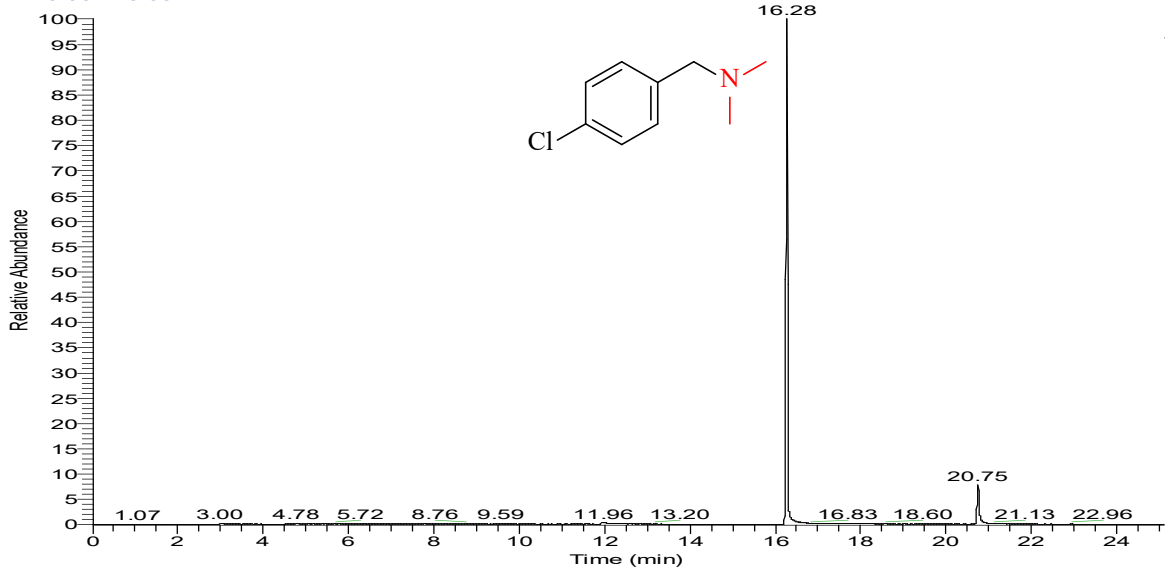NL:  
1.88E9  
TIC MS  
E-44-3E-44-3 #4776 RT: 16.28 AV: 1 NL: 4.60E8  
T: + c EI Full ms [15.00-400.00]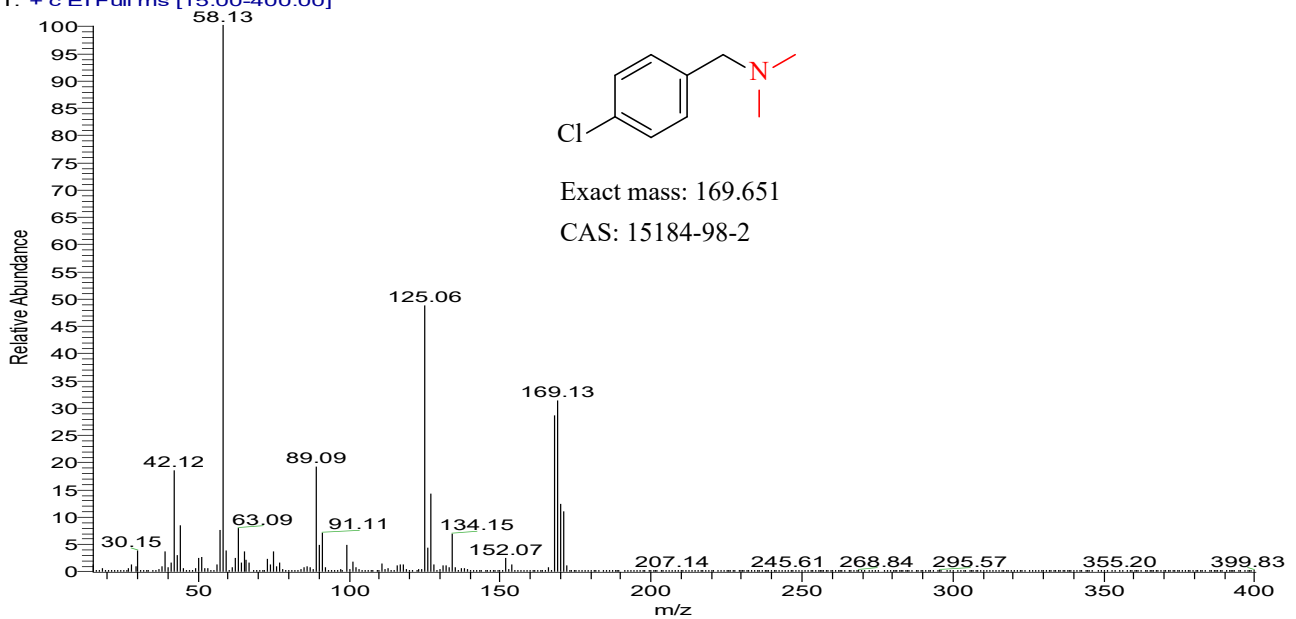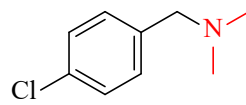

Exact mass: 169.651

CAS: 15184-98-2

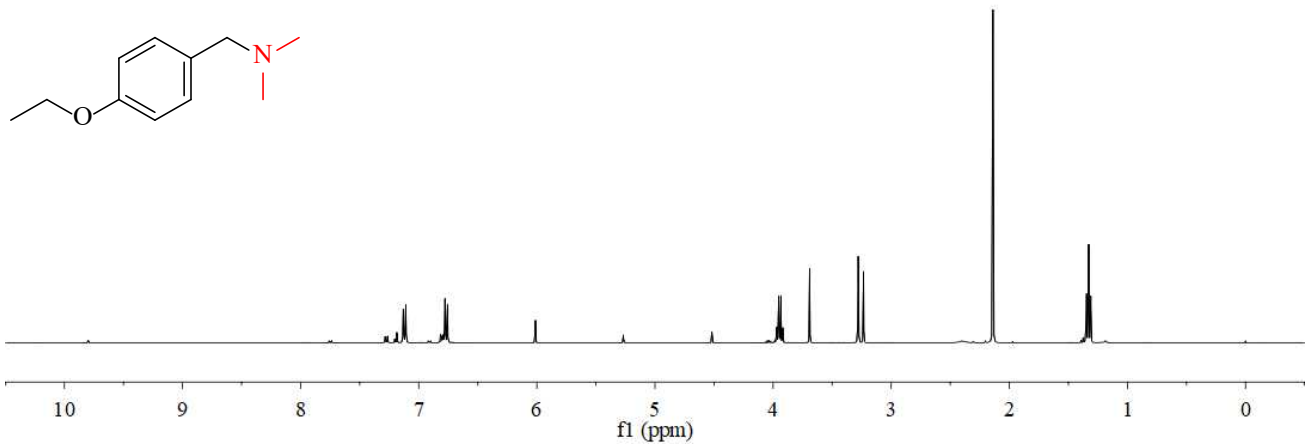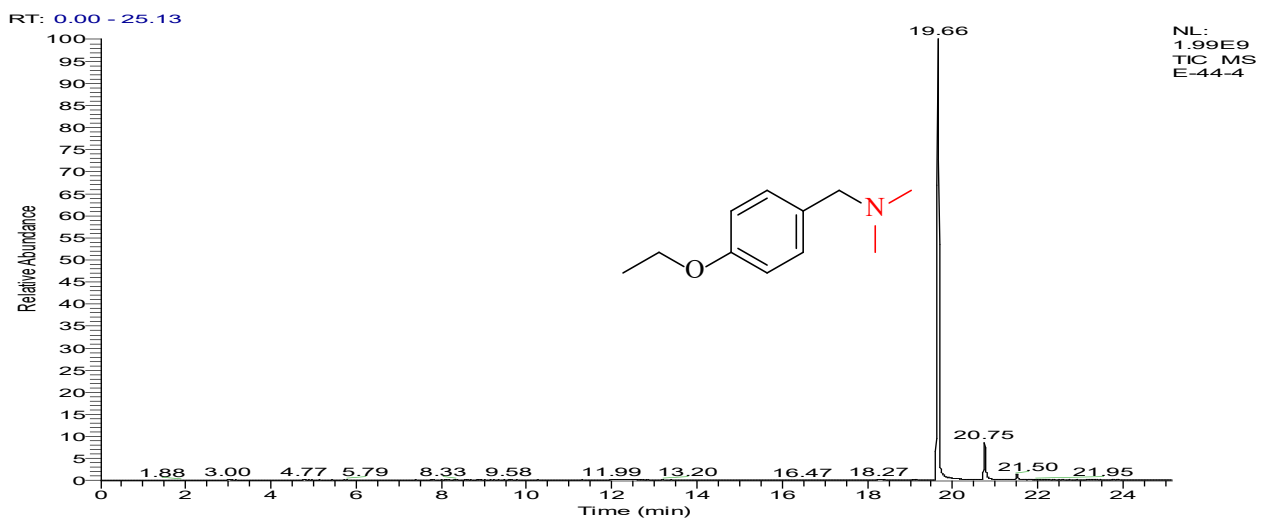

E-44-4 #5770 RT: 19.66 AV: 1 NL: 5.42E8  
T: + c EI Full ms [15.00-400.00]

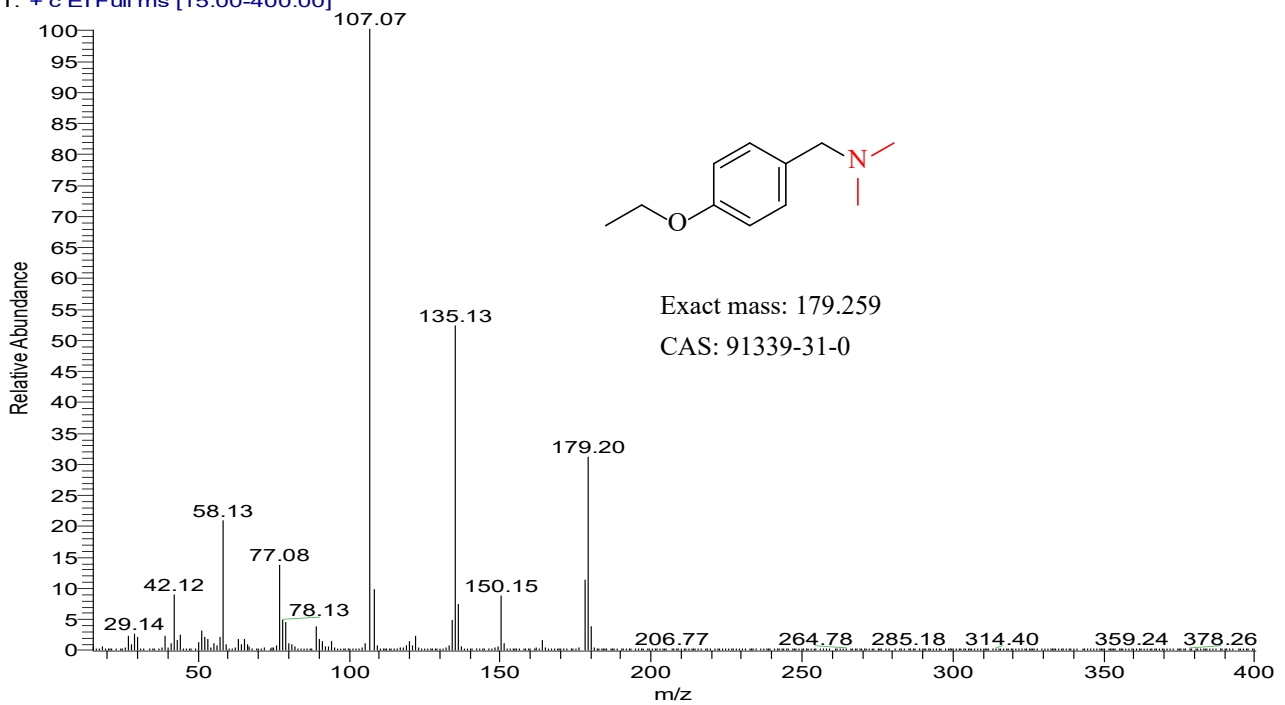

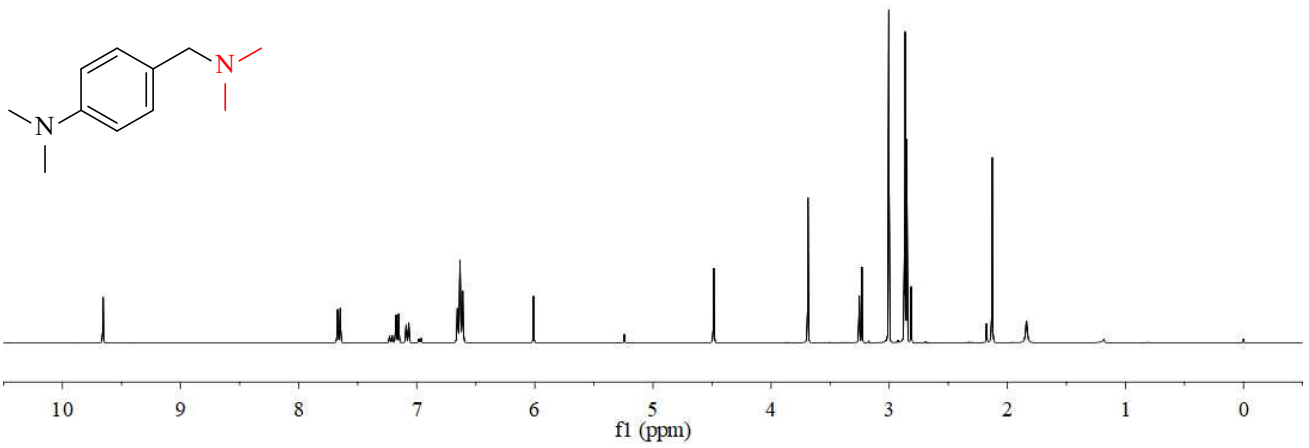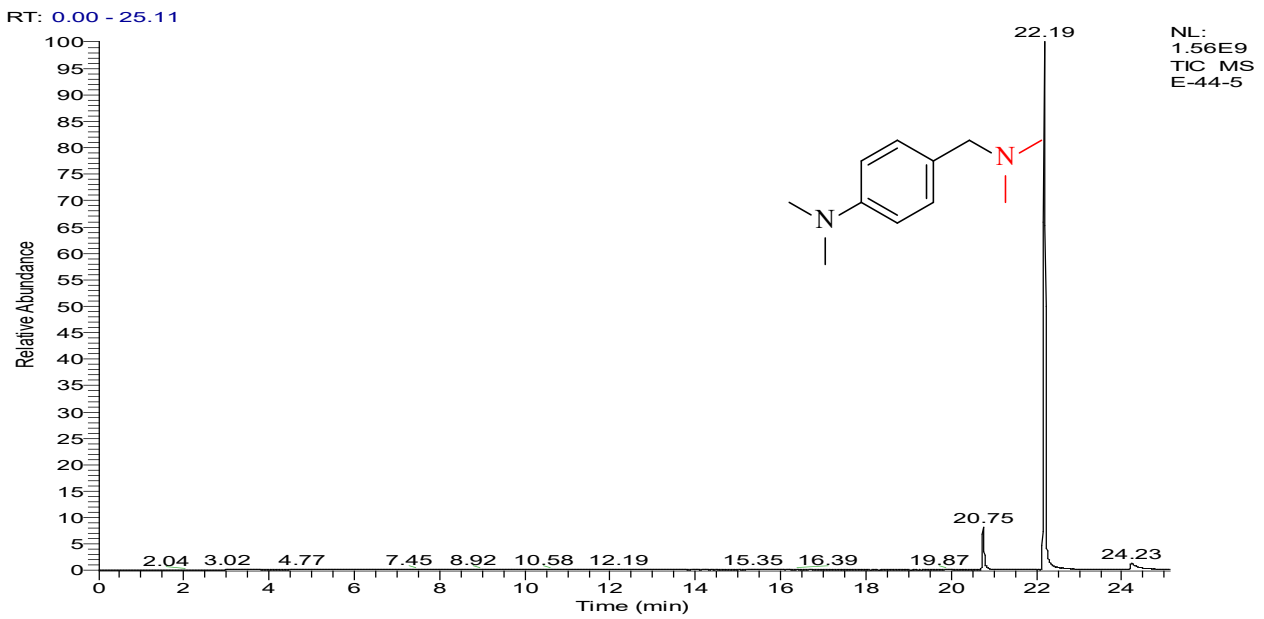

E-44-5 #6514 RT: 22.19 AV: 1 NL: 7.02E8  
T: + c EI Full ms [15.00-400.00]

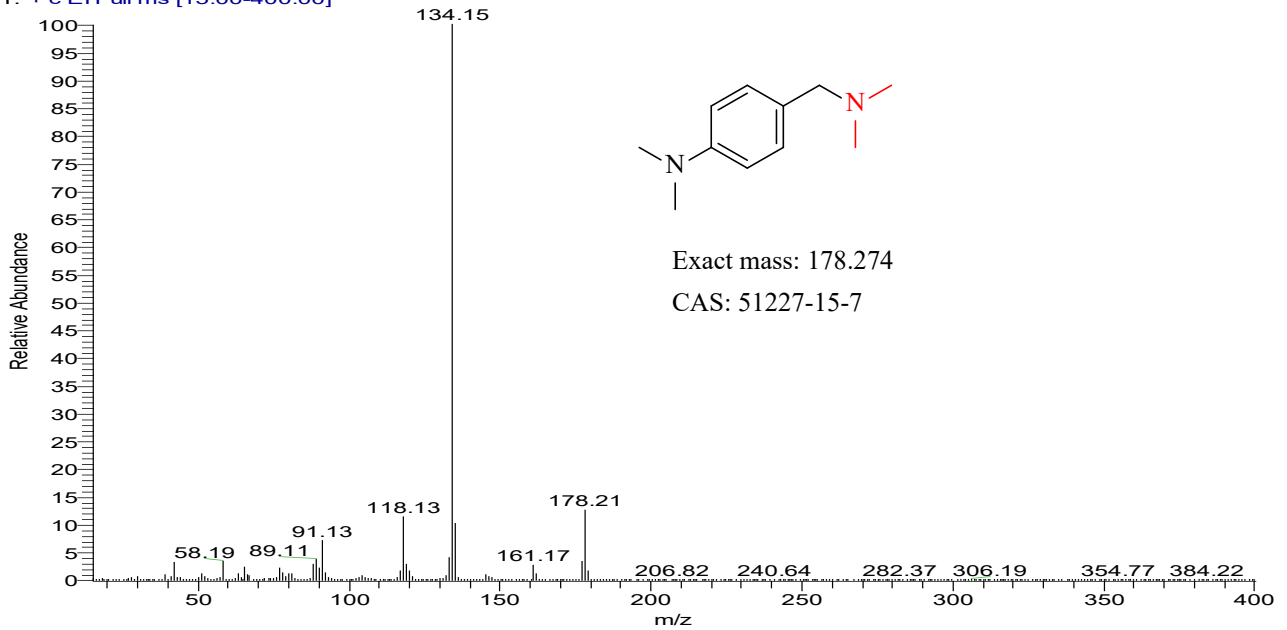

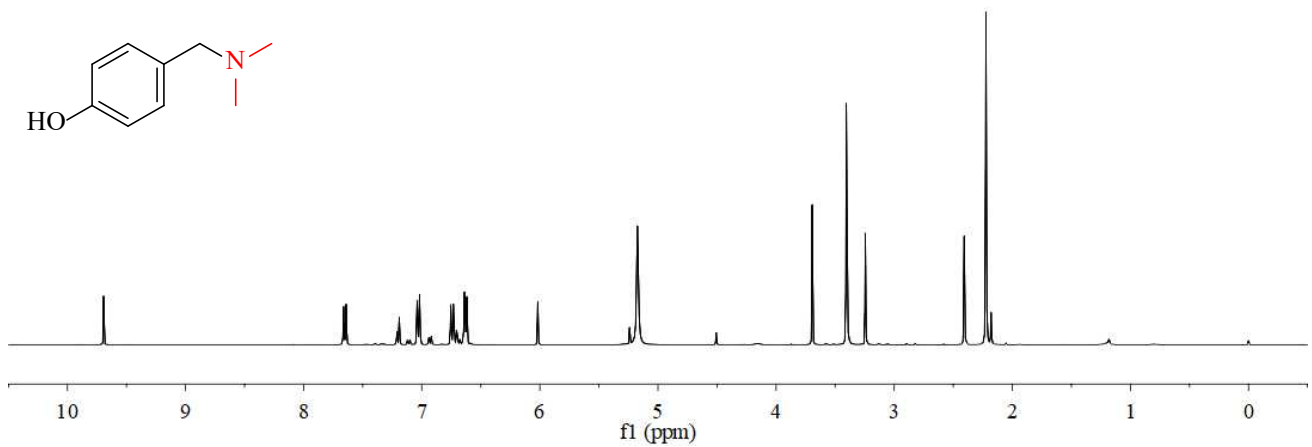

RT: 0.00 - 25.10

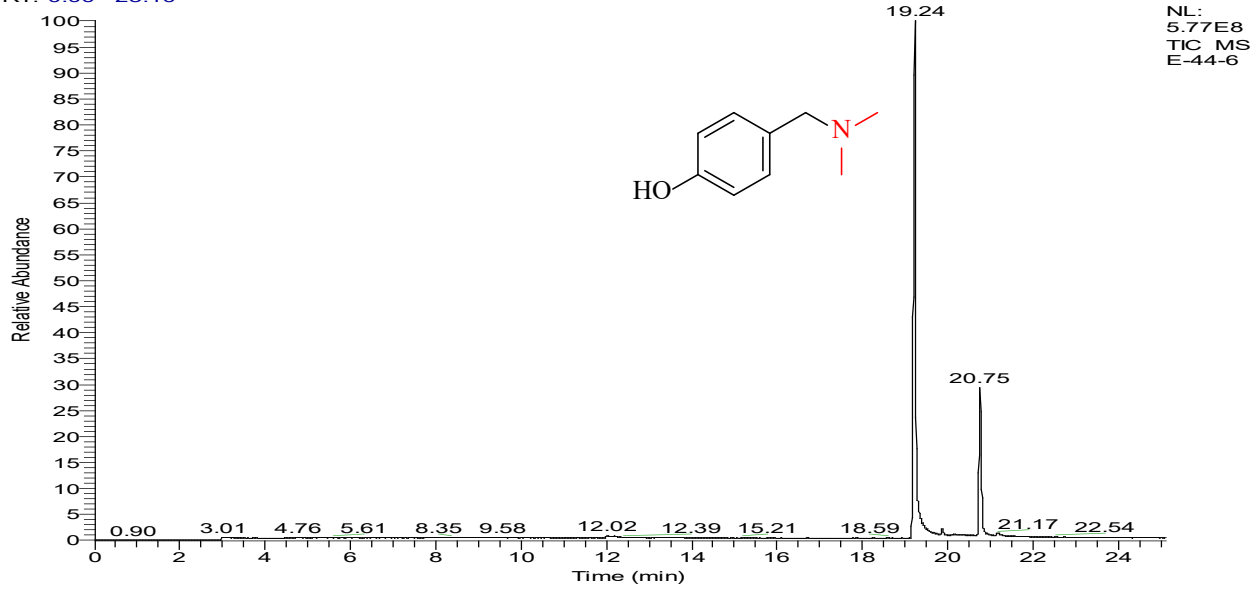E-44-6 #5649 RT: 19.24 AV: 1 NL: 1.22E8  
T: + c EI Full ms [15.00-400.00]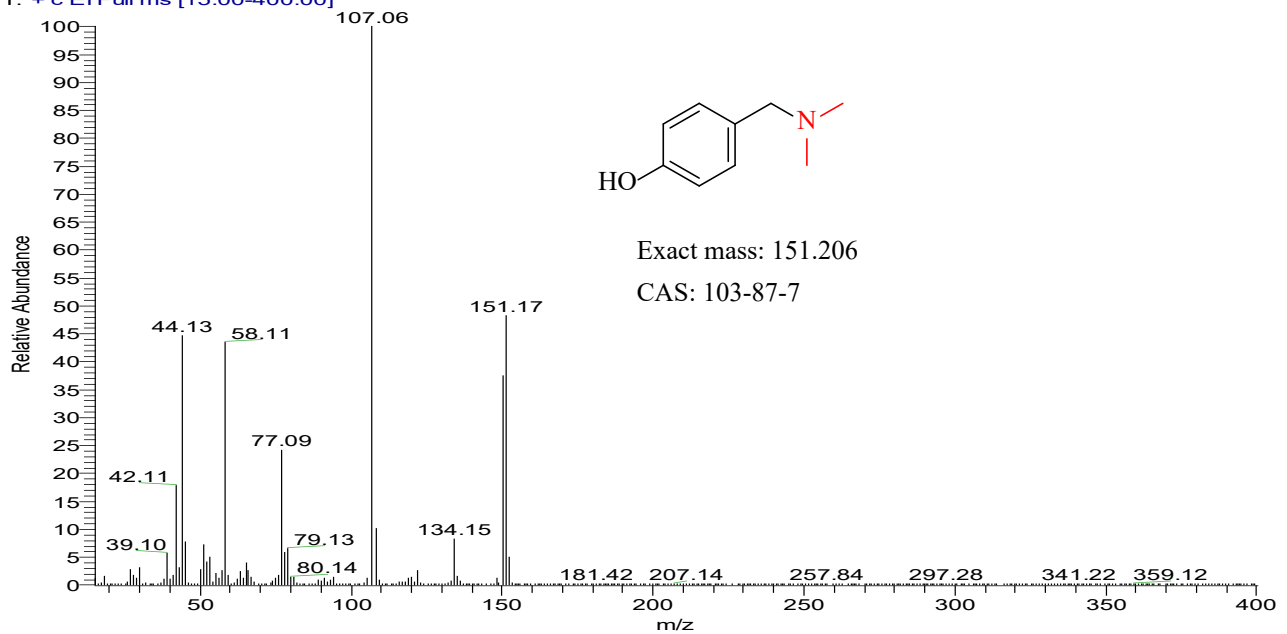

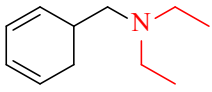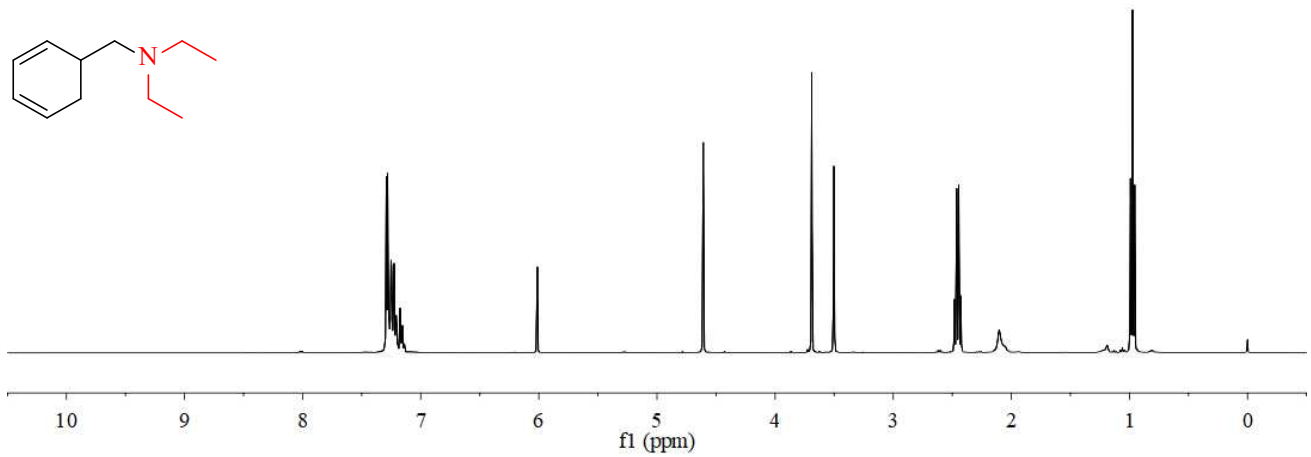

RT: 0.00 - 25.12

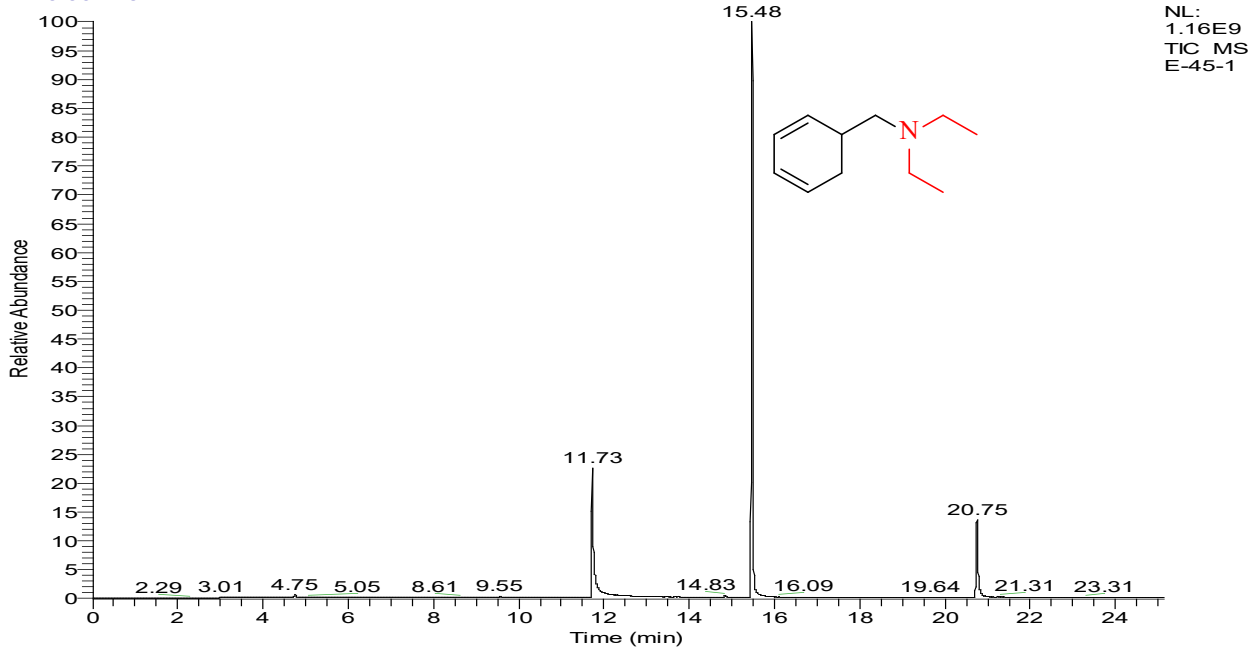E-45-1 #4541 RT: 15.48 AV: 1 NL: 5.37E8  
T: + c EI Full ms [15.00-400.00]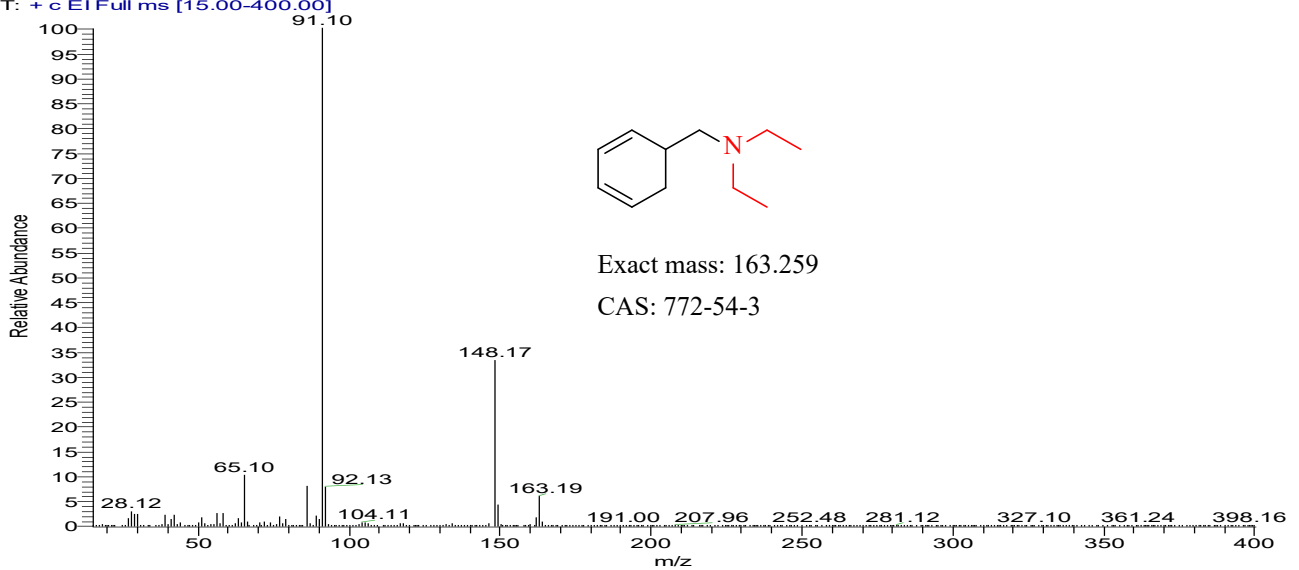

57

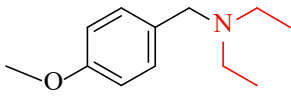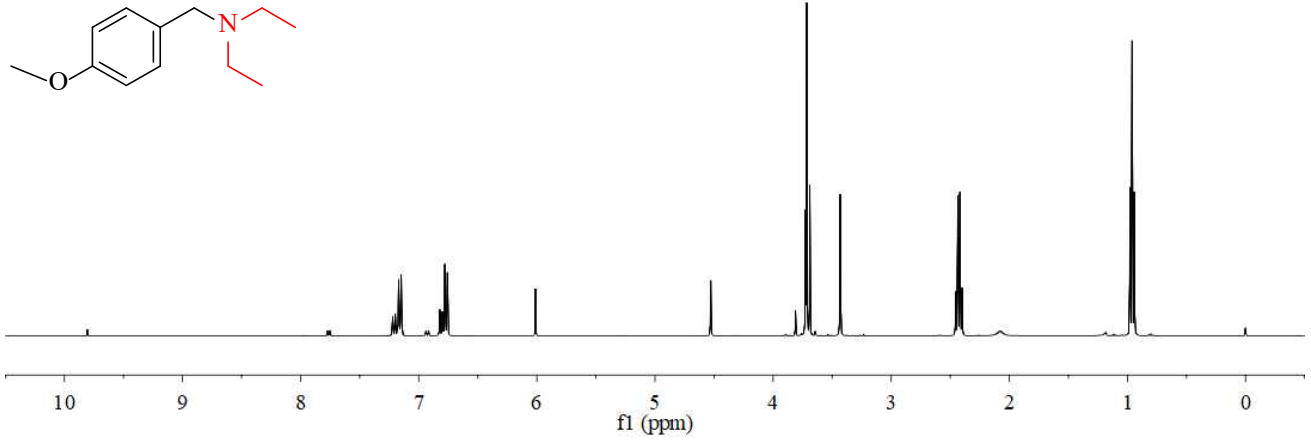

RT: 0.00 - 25.09

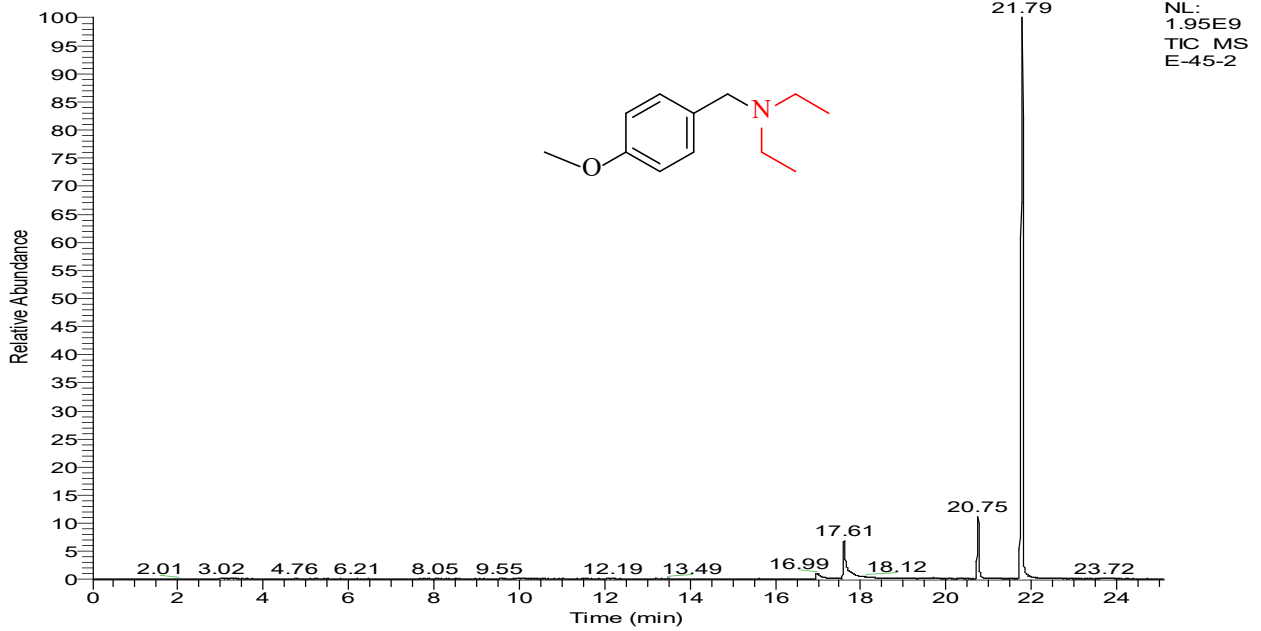

E-45-2 #6396 RT: 21.79 AV: 1 NL: 9.68E8  
T: + c EI Full ms [15.00-400.00]

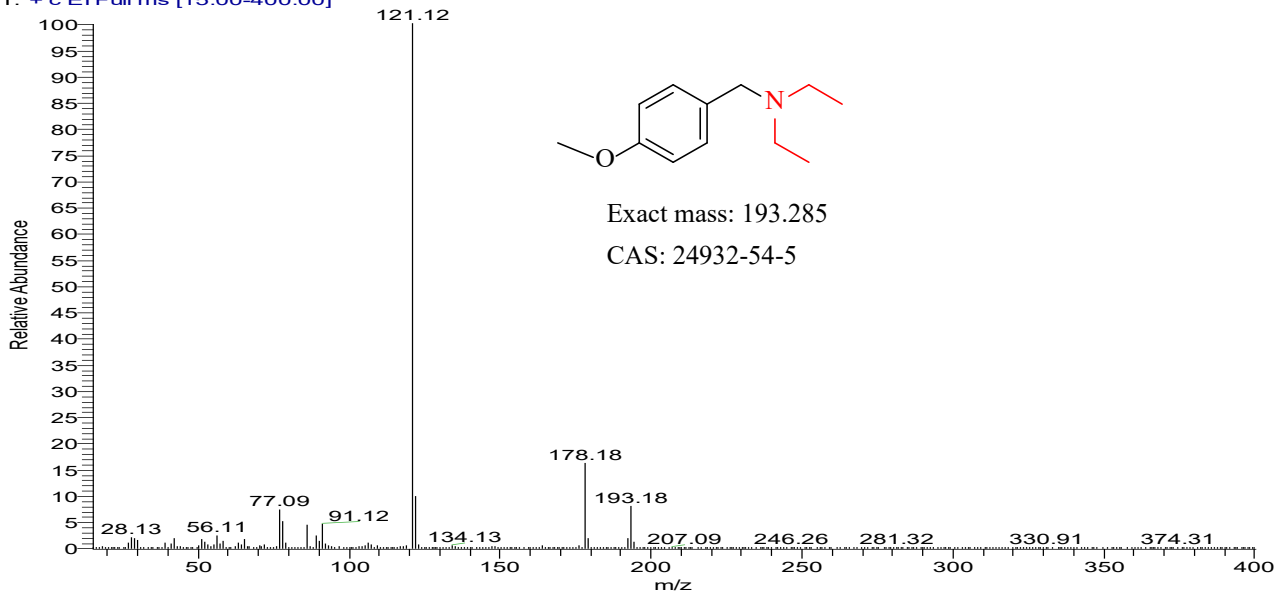

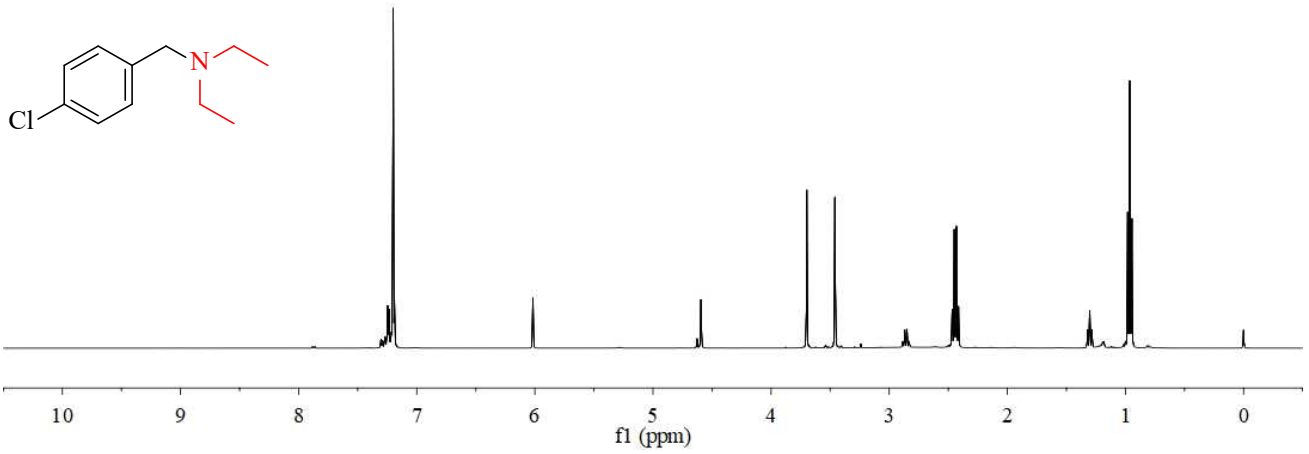

RT: 0.00 - 25.11

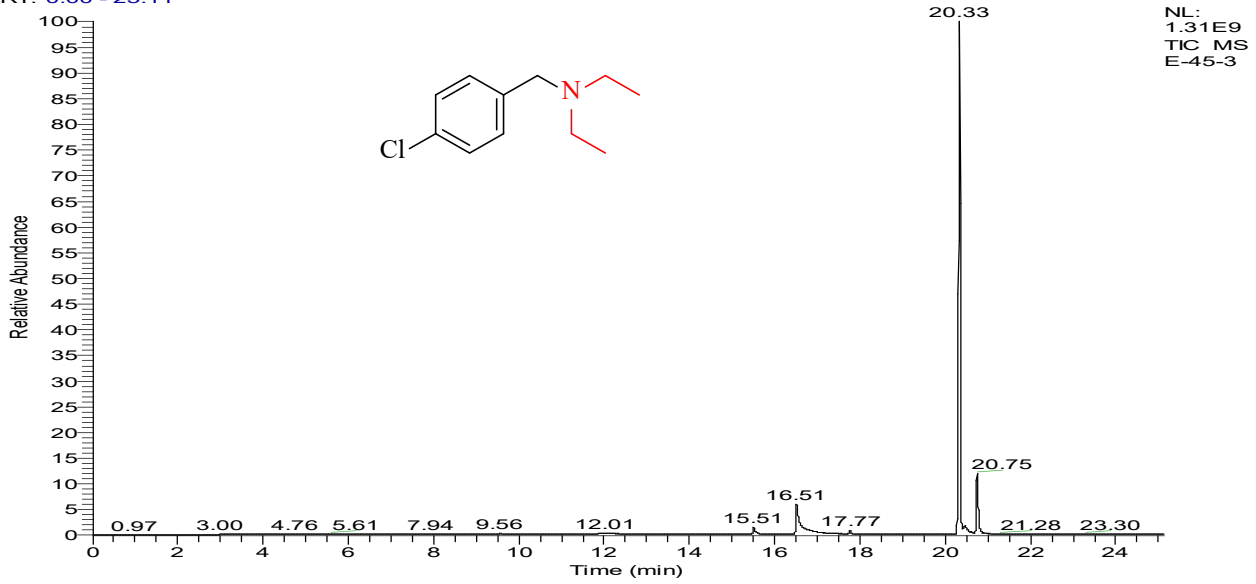

E-45-3 #5967 RT: 20.33 AV: 1 NL: 3.90E8  
T: + c EI Full ms [15.00-400.00]

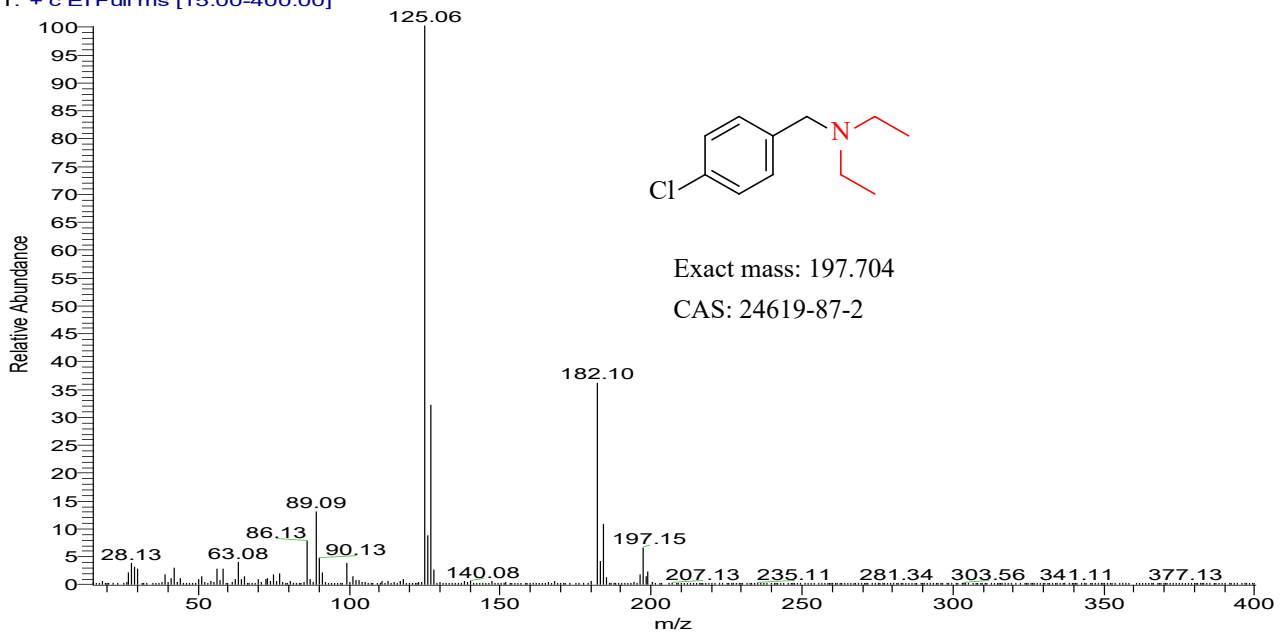



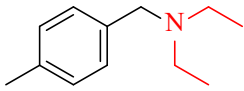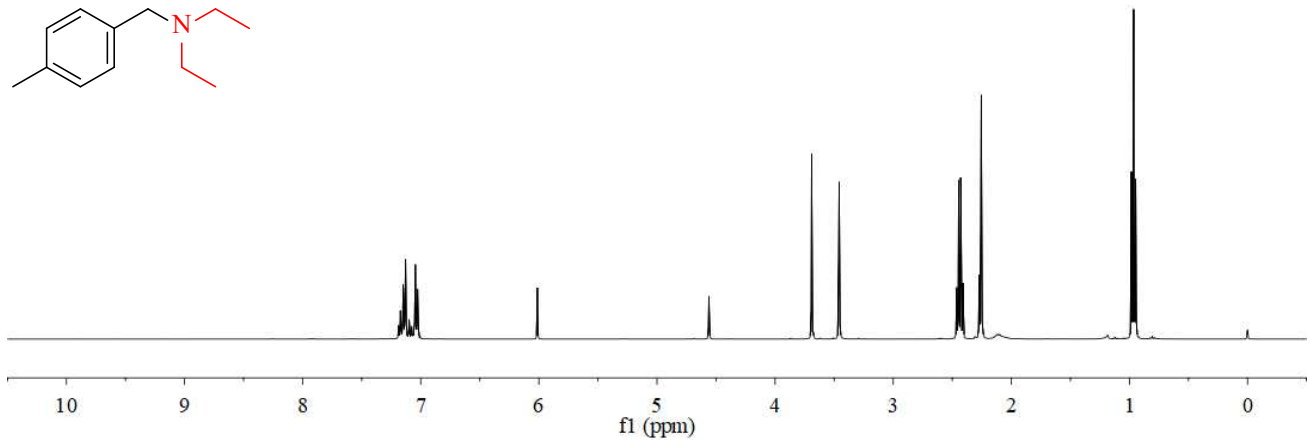

RT: 0.00 - 25.10

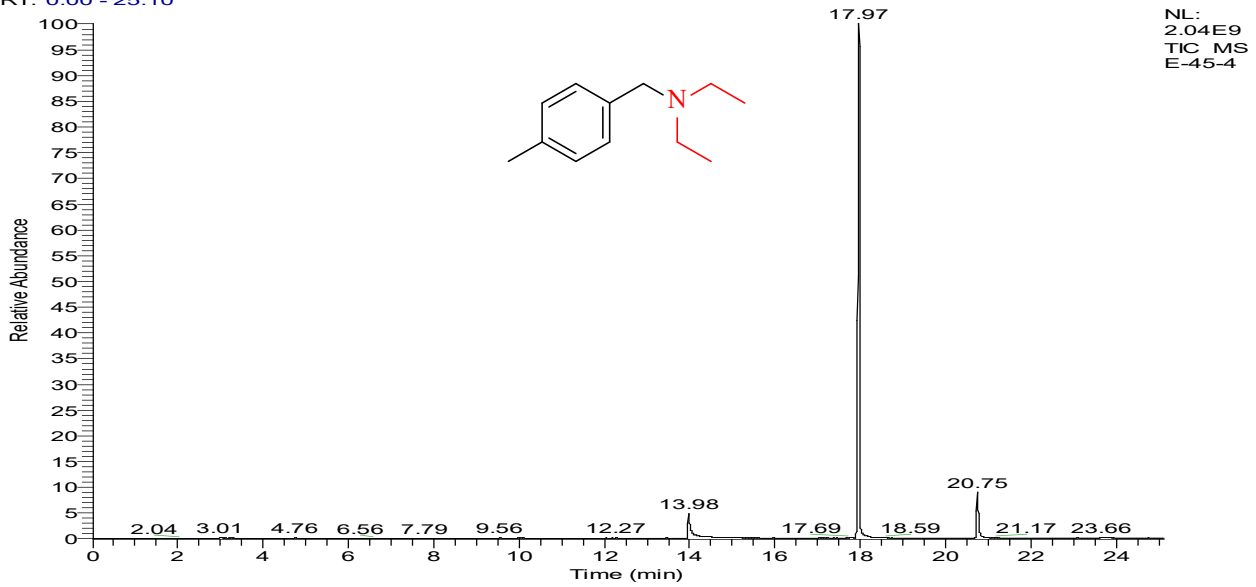E-45-4 #5273 RT: 17.97 AV: 1 NL: 8.94E8  
T: + c EI Full ms [15.00-400.00]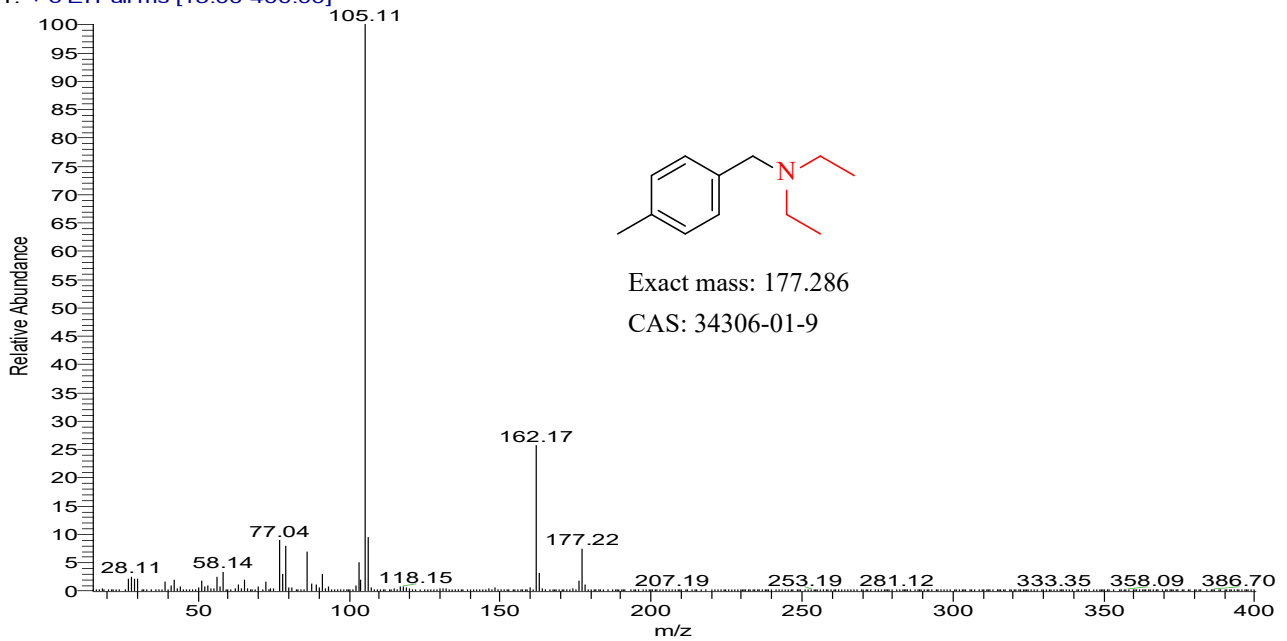

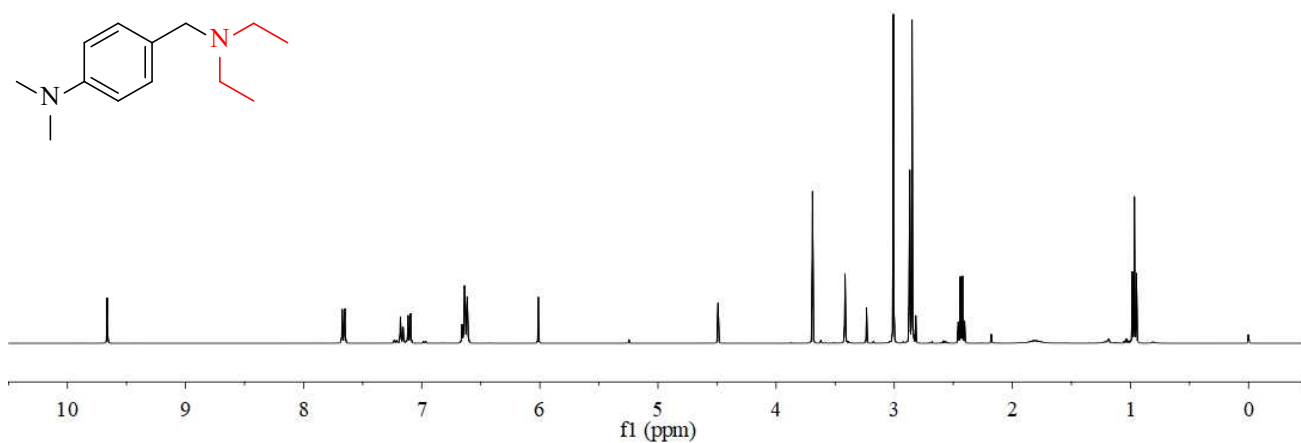

RT: 0.00 - 32.10

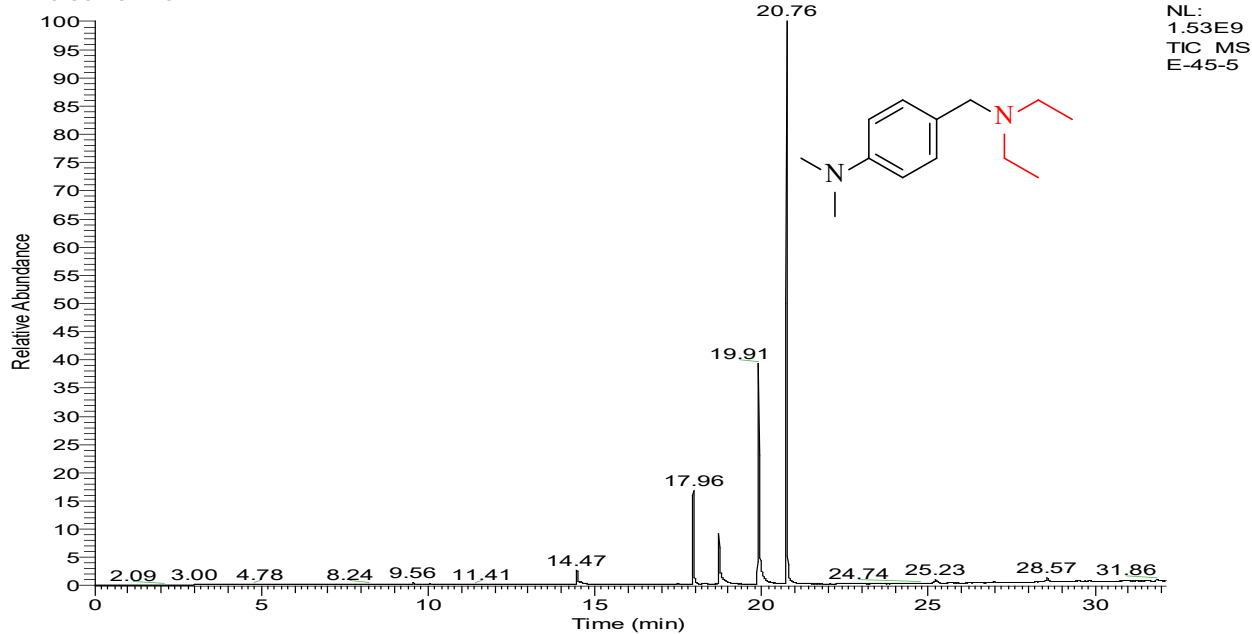E-45-5 #6094 RT: 20.76 AV: 1 NL: 7.79E8  
T: + c EI Full ms [10.00-400.00]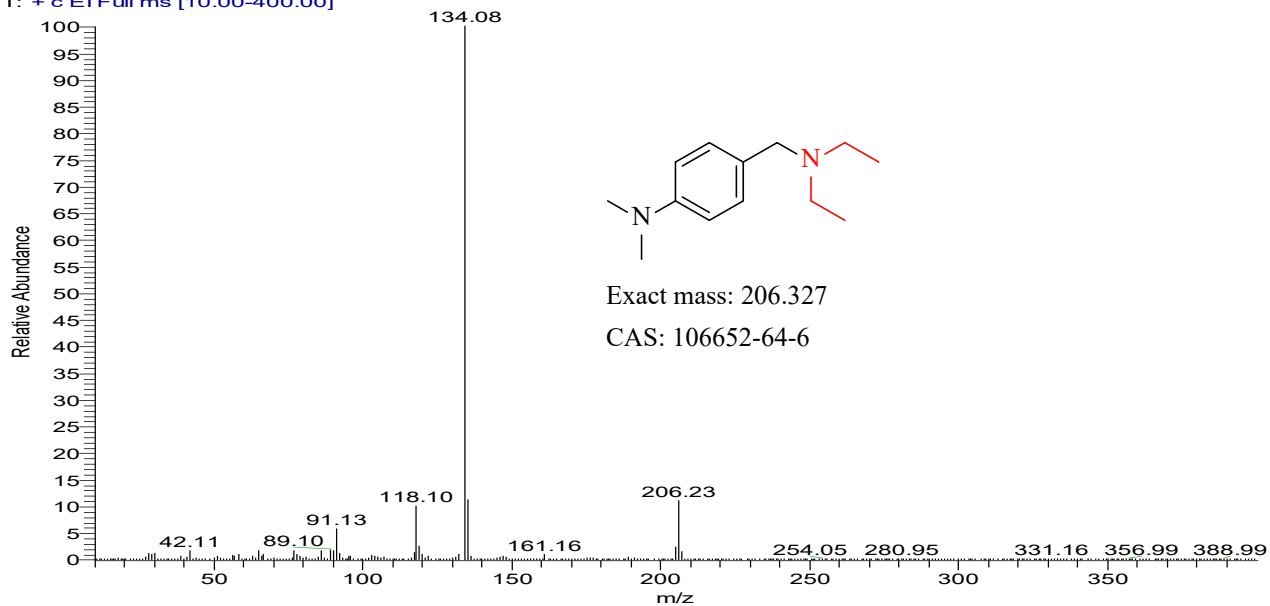

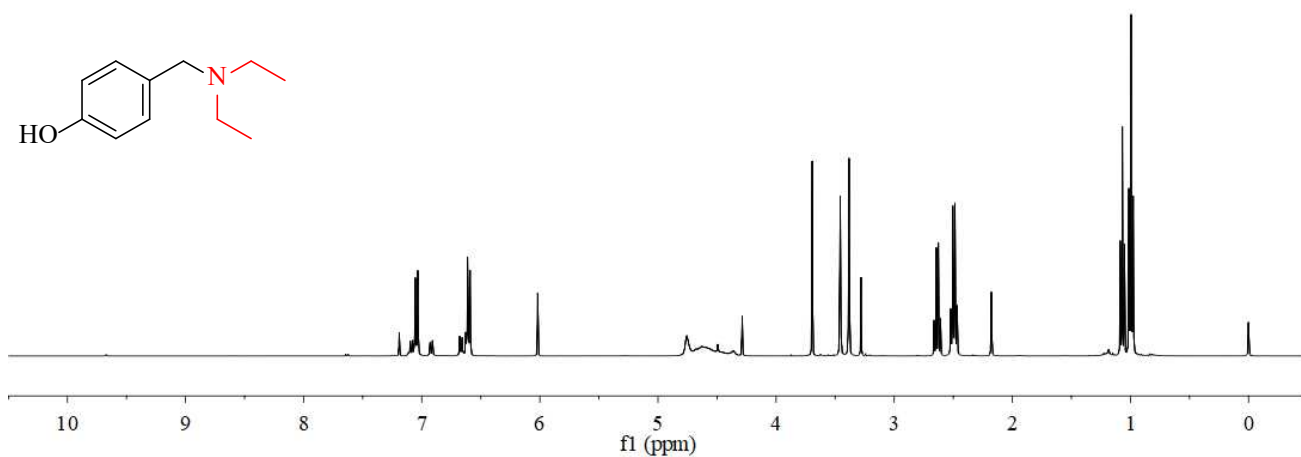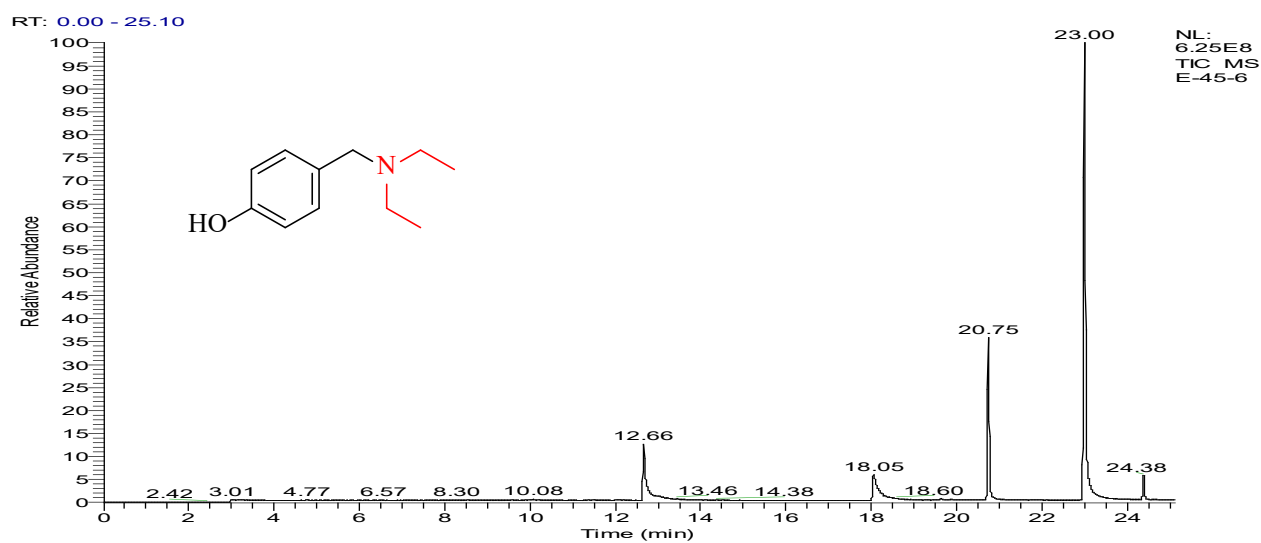

E-45-6 #6753 RT: 23.00 AV: 1 NL: 1.68E8  
T: + c EI Full ms [15.00-400.00]

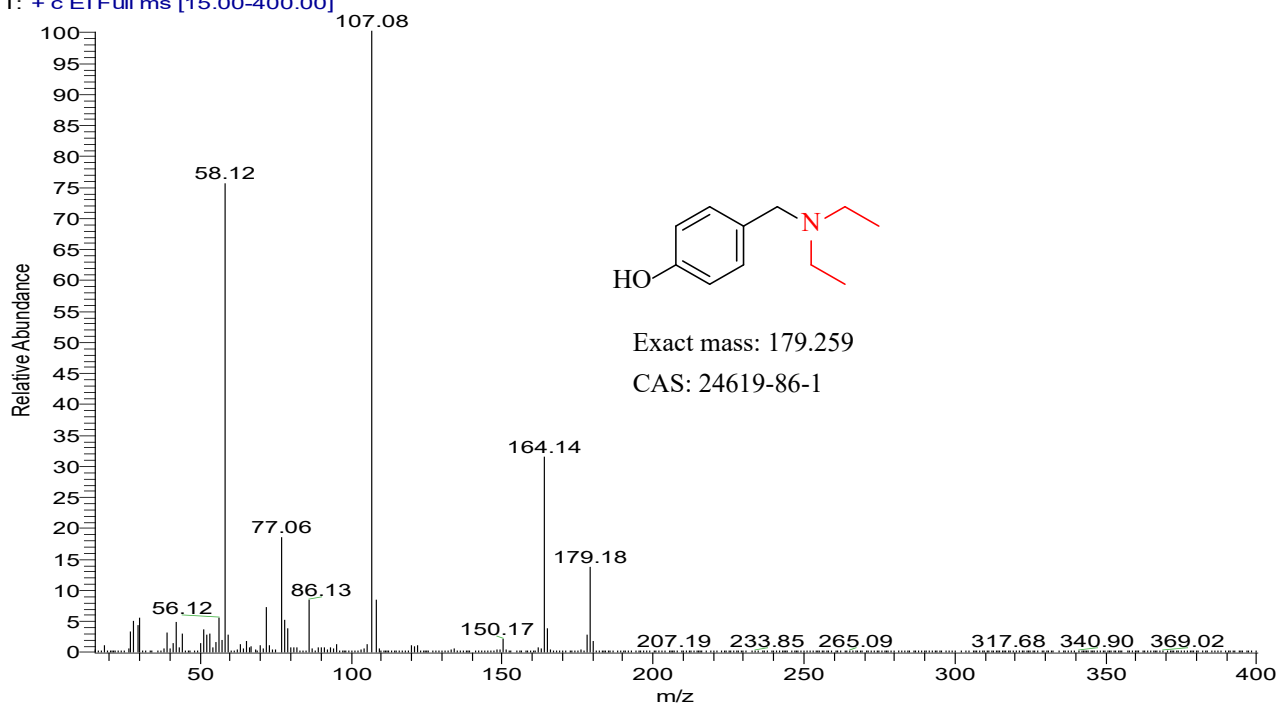

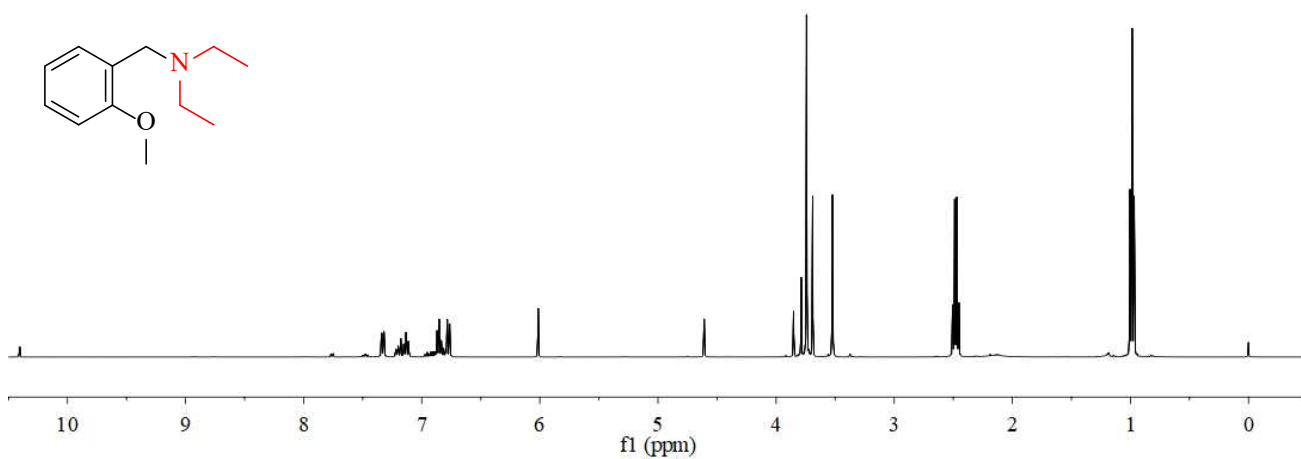

RT: 0.00 - 25.11

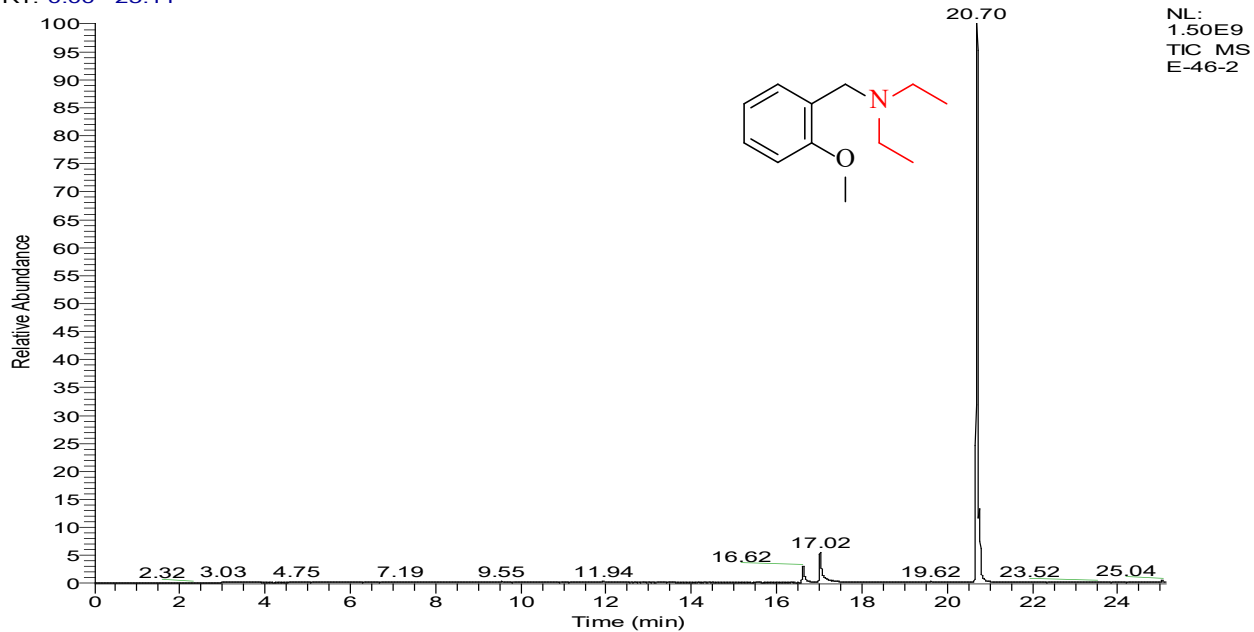E-46-2 #6076 RT: 20.70 AV: 1 NL: 4.58E8  
T: + c EI Full ms [15.00-400.00]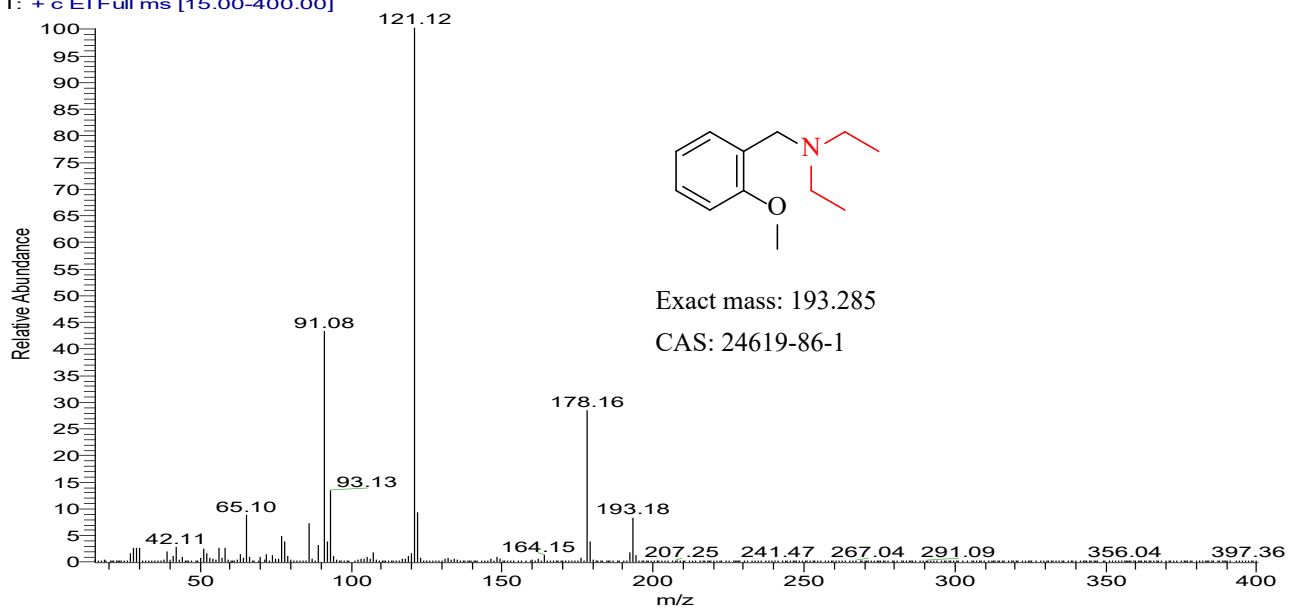

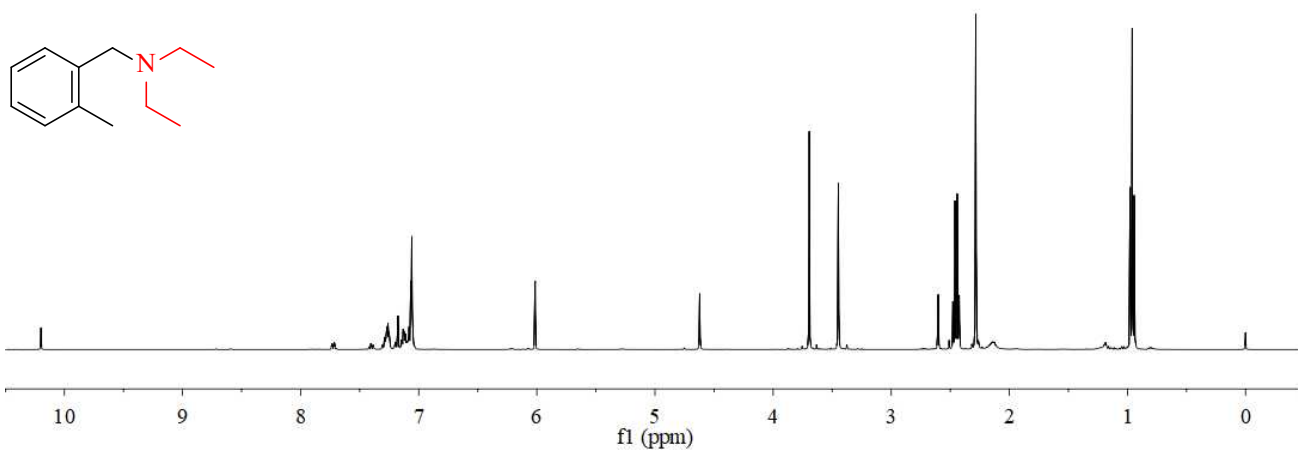

RT: 0.00 - 25.09

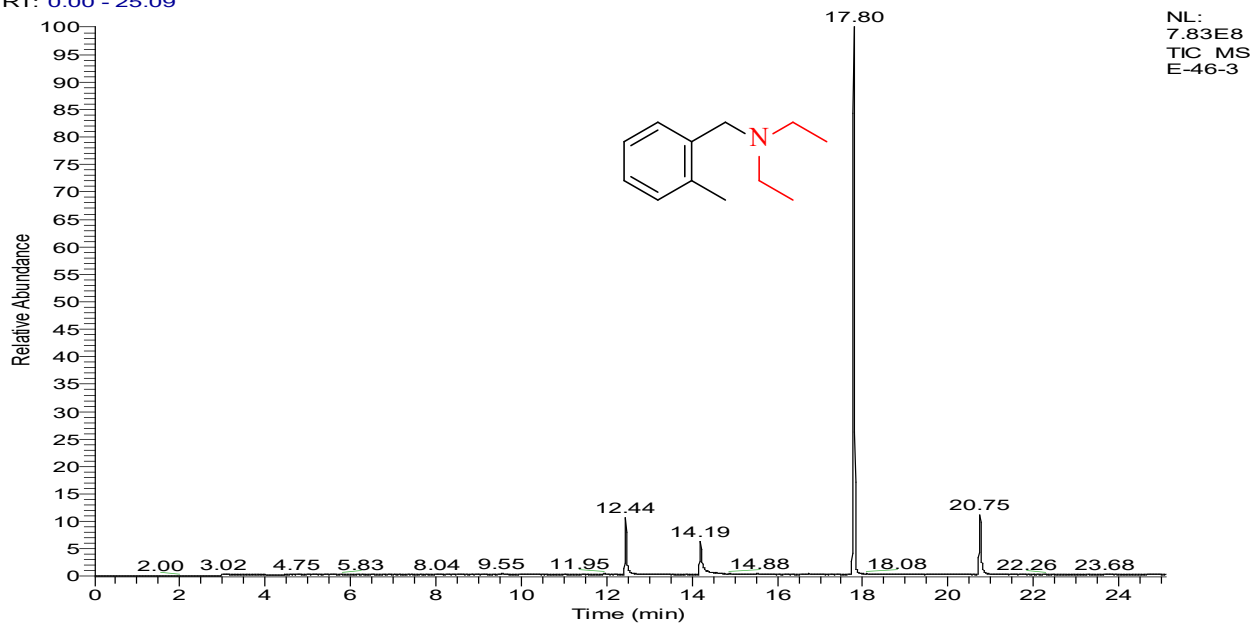E-46-3 #5225 RT: 17.80 AV: 1 NL: 2.66E8  
T: + c EI Full ms [15.00-400.00]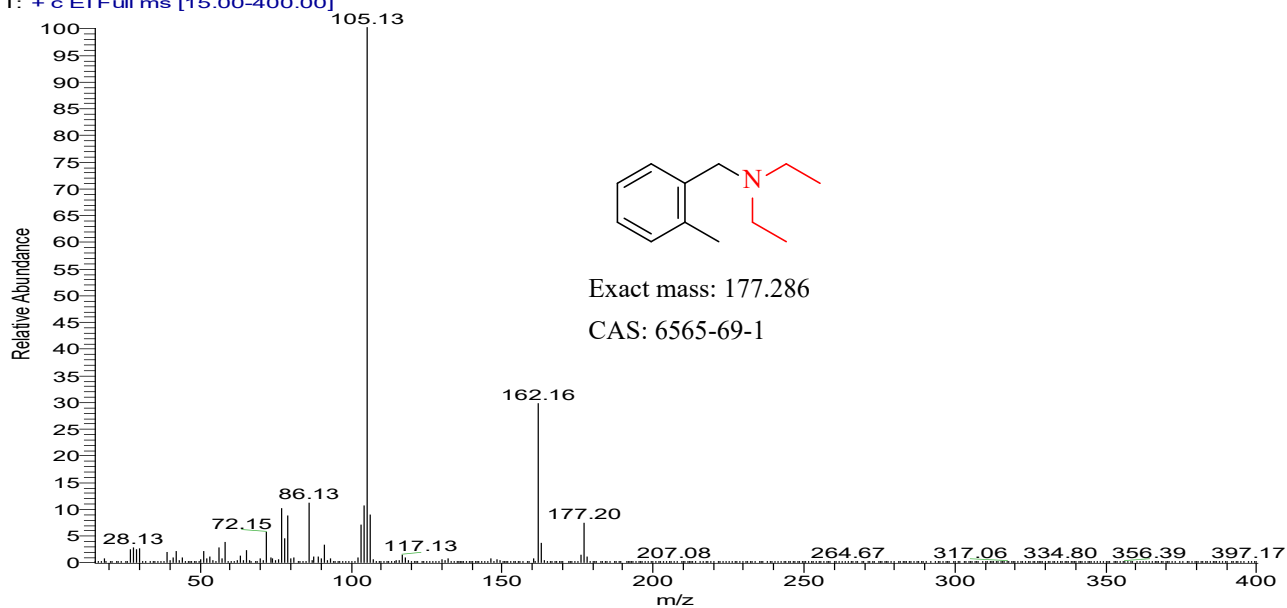

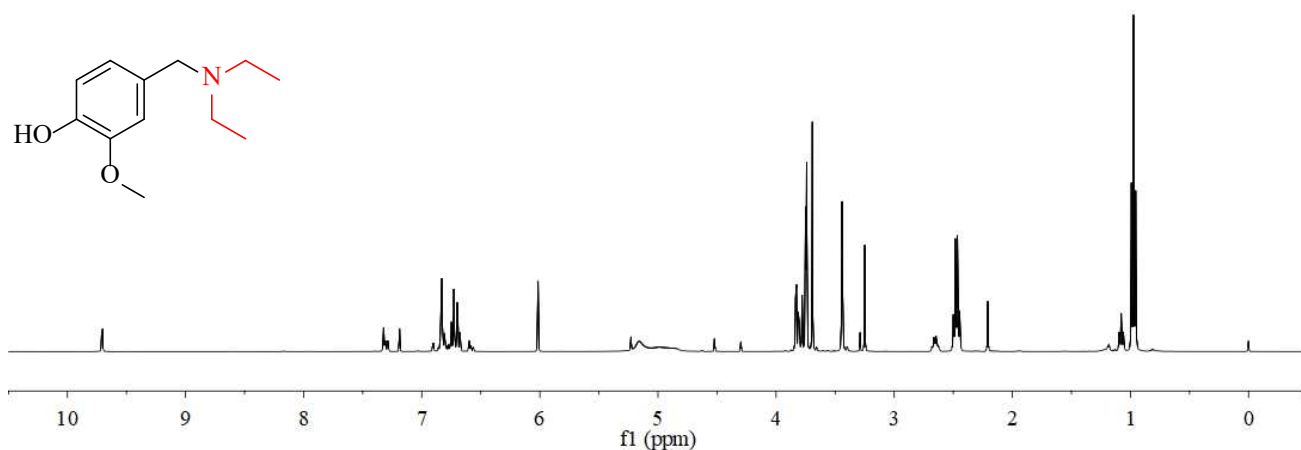

RT: 0.00 - 32.11

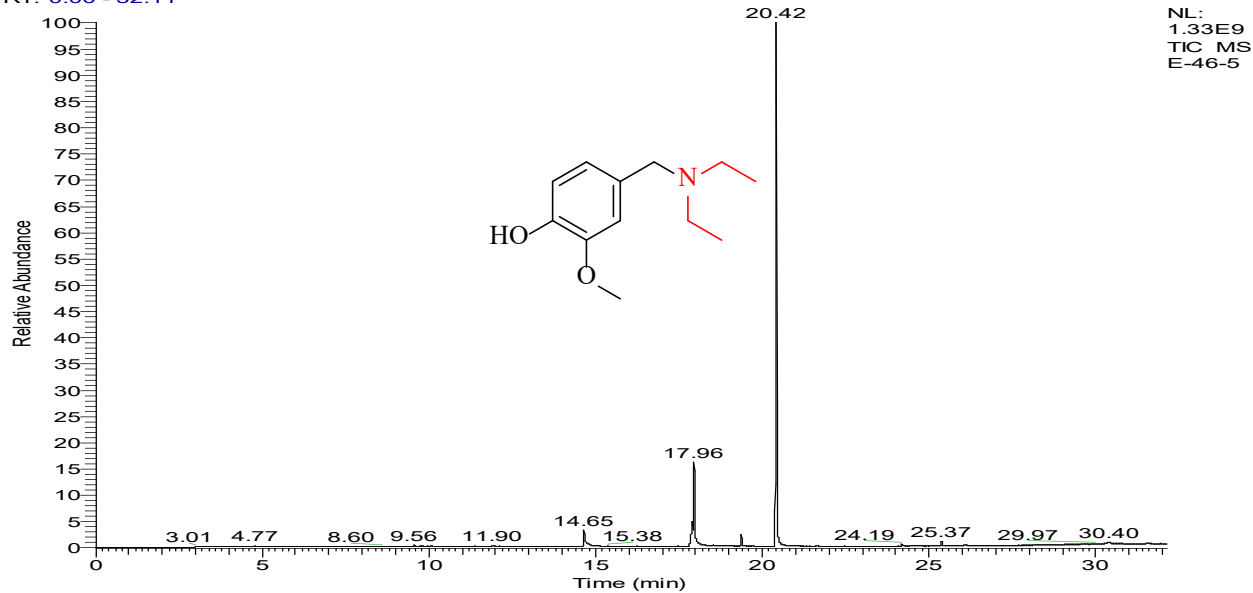E-46-5 #5994 RT: 20.42 AV: 1 NL: 4.79E8  
T: + c EI Full ms [10.00-400.00]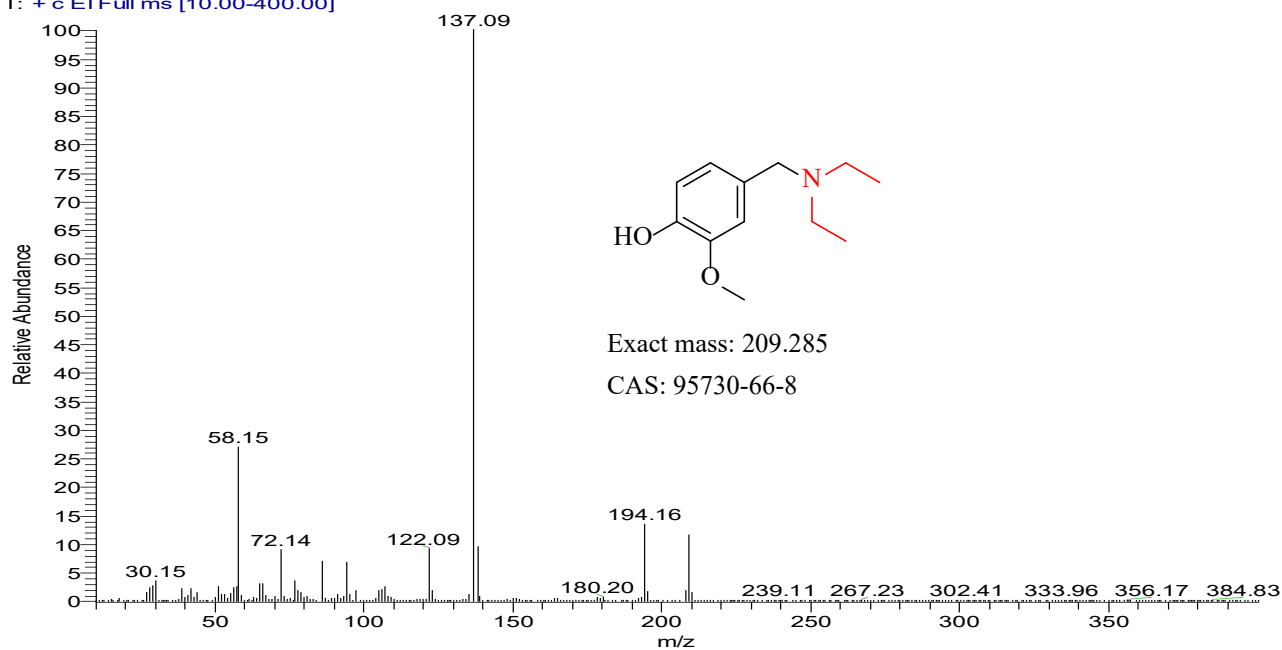

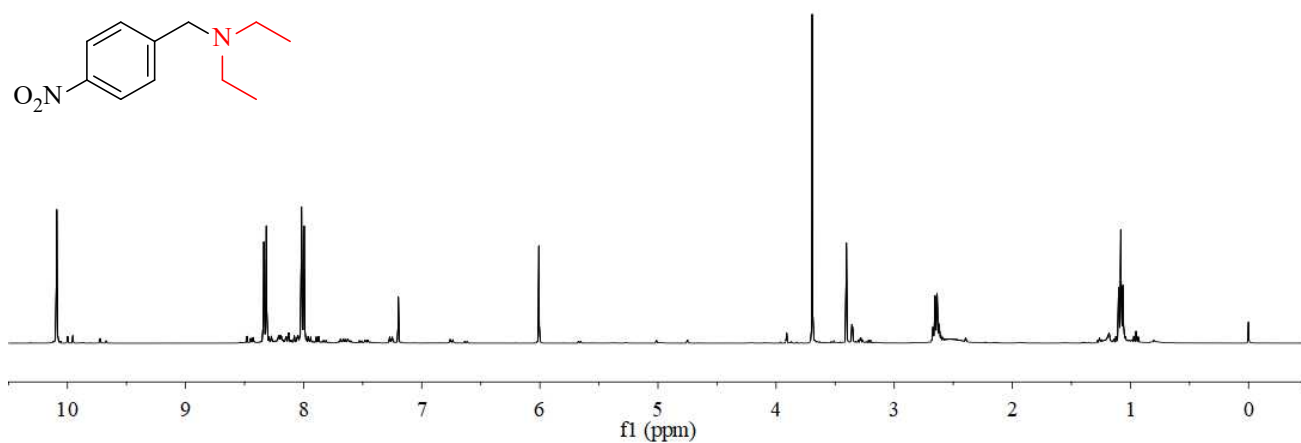

RT: 0.00 - 25.10

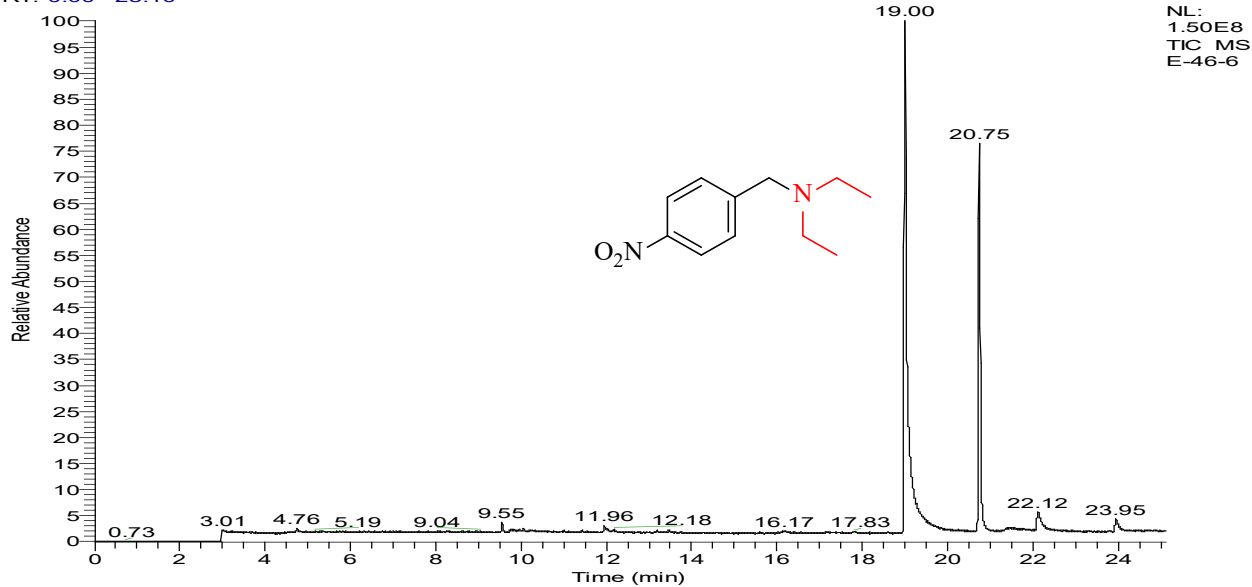

E-46-6 #5578 RT: 19.00 AV: 1 NL: 2.38E7

T: + c EI Full ms [15.00-400.00]

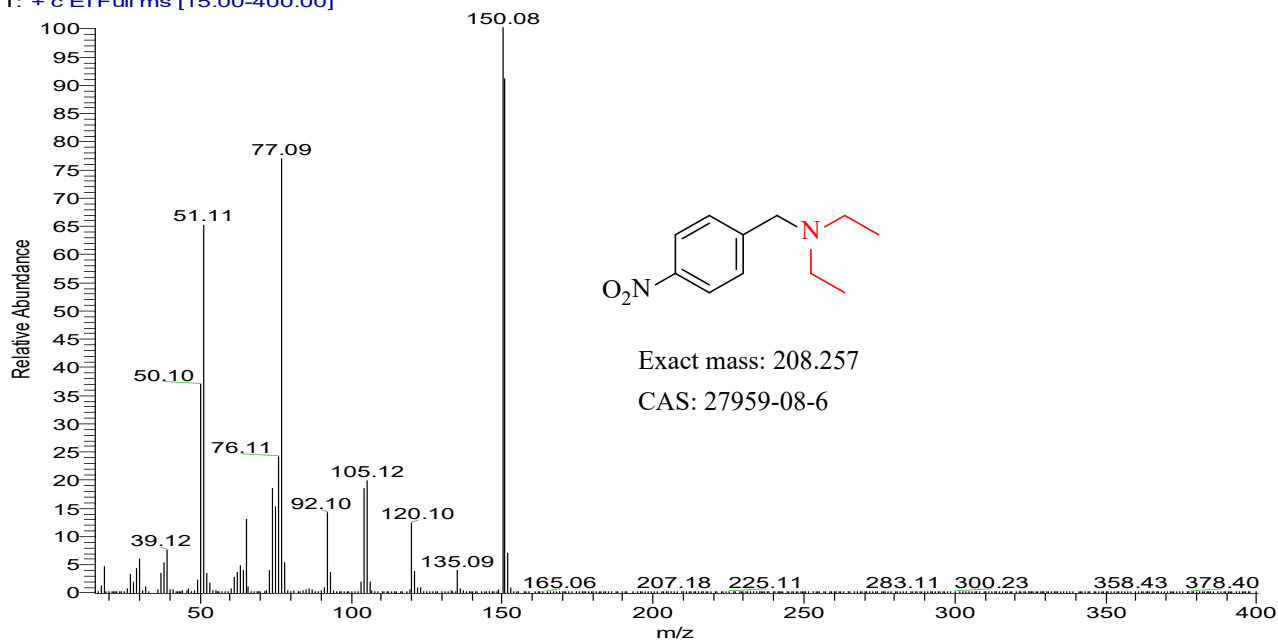

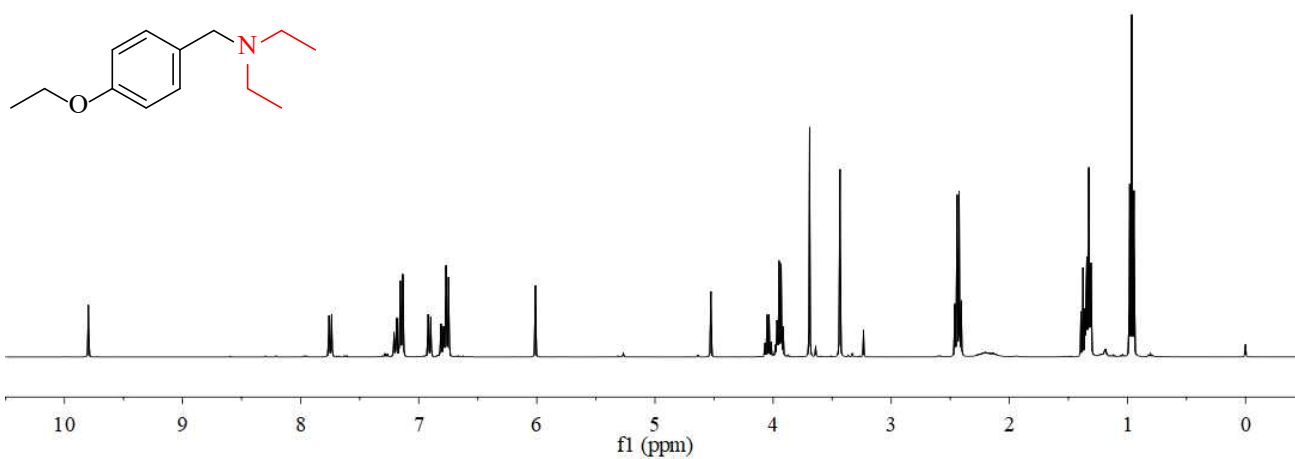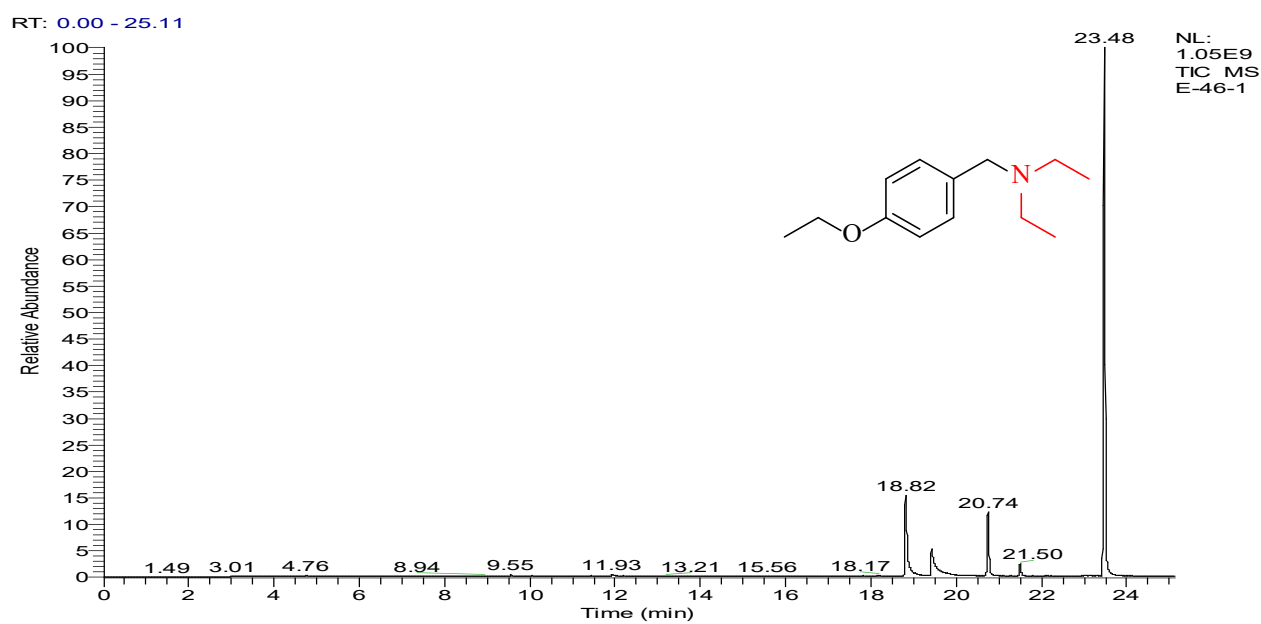

E-46-1 #6893 RT: 23.48 AV: 1 NL: 3.20E8  
T: + c EI Full ms [15.00-400.00]

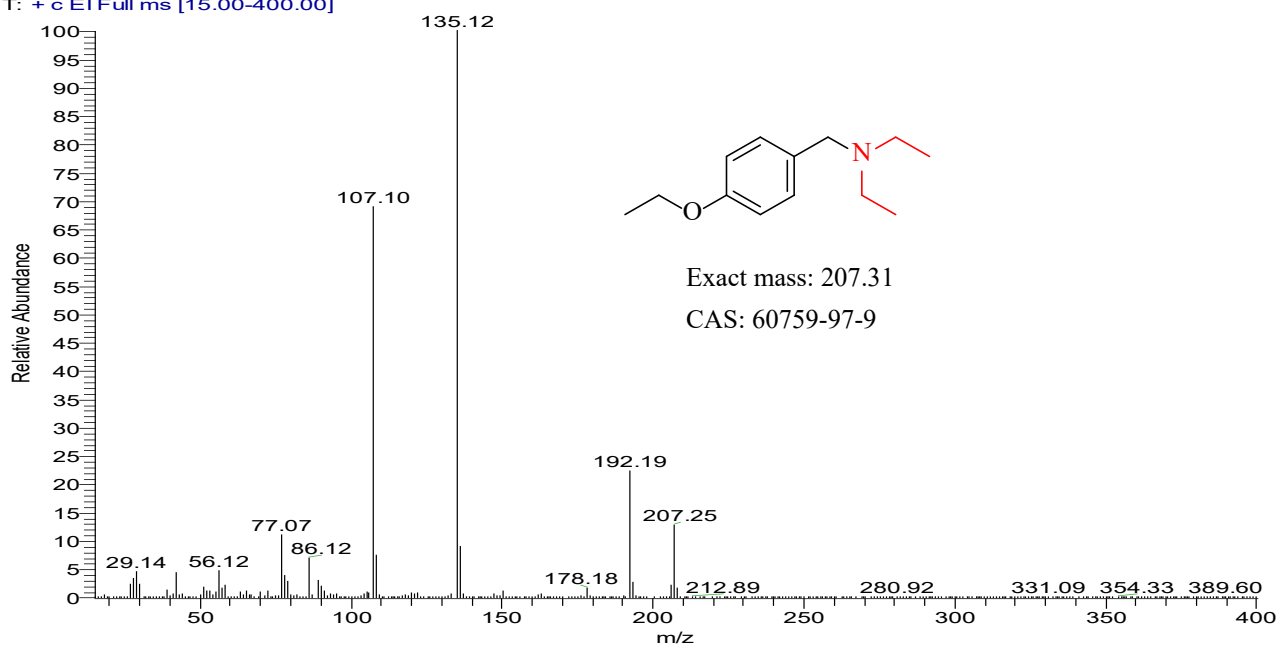



67

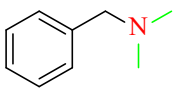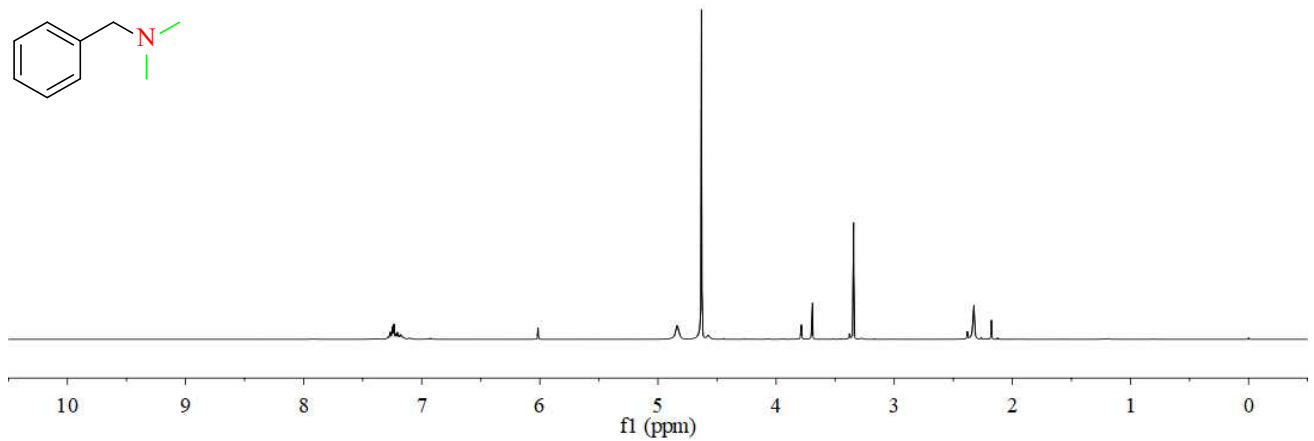

RT: 0.00 - 25.13

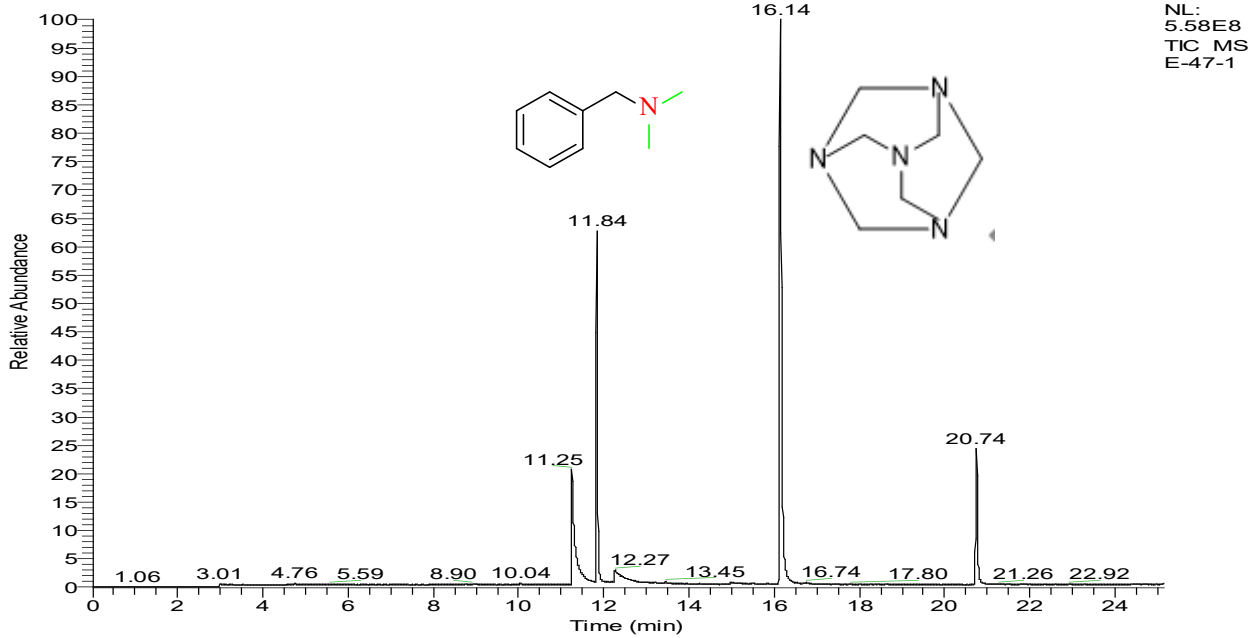

E-47-1 #3472 RT: 11.84 AV: 1 NL: 8.22E7  
T: +c EI Full ms [15.00-400.00]

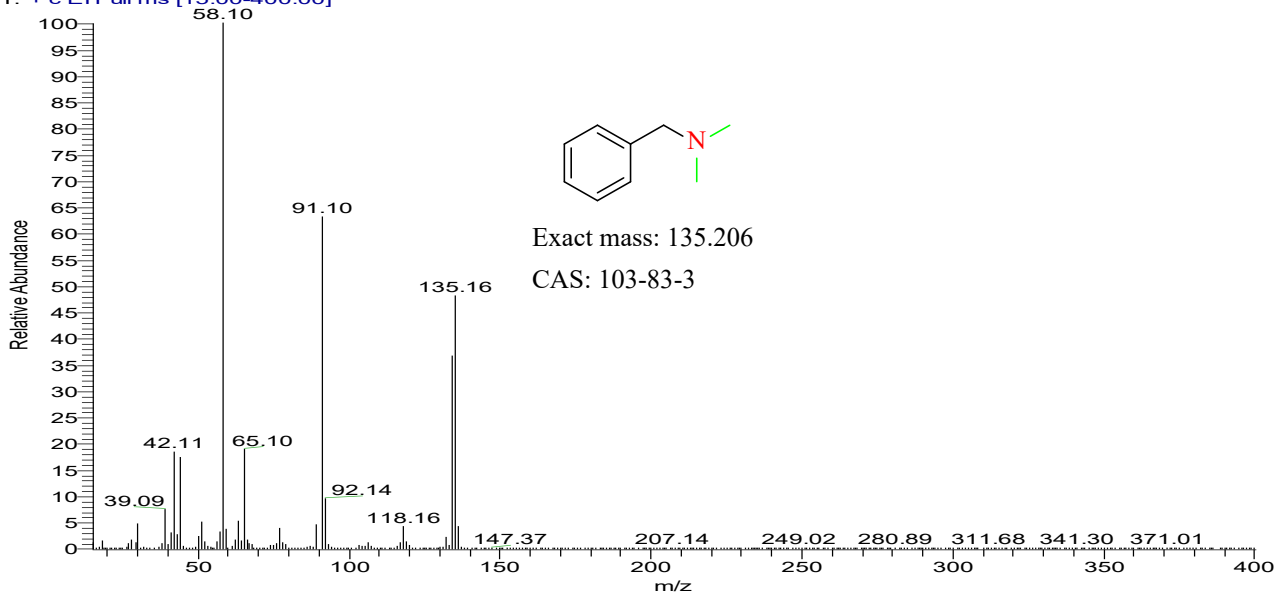

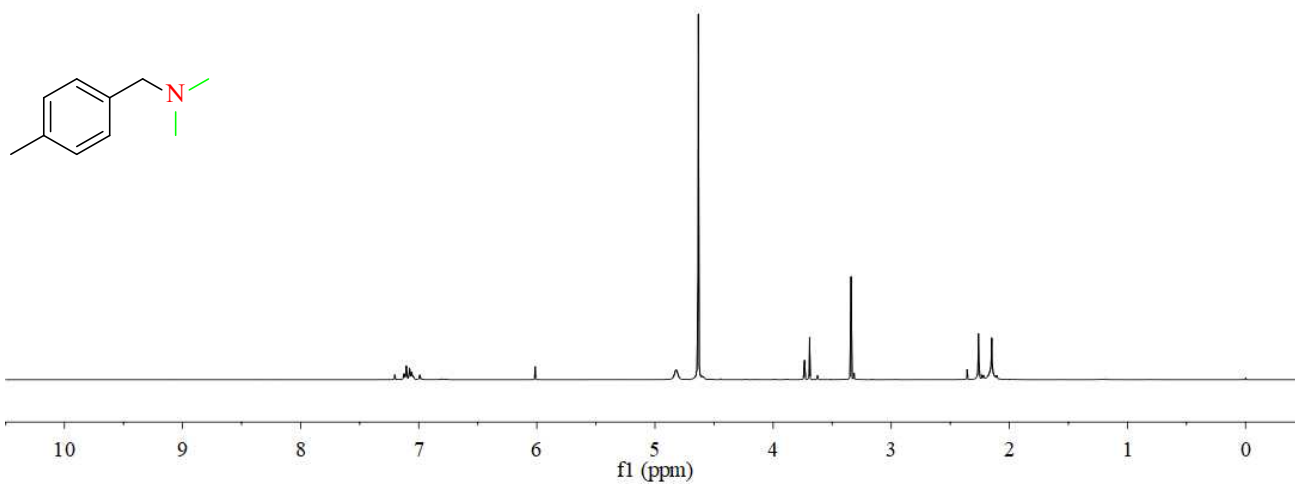

RT: 0.00 - 25.12

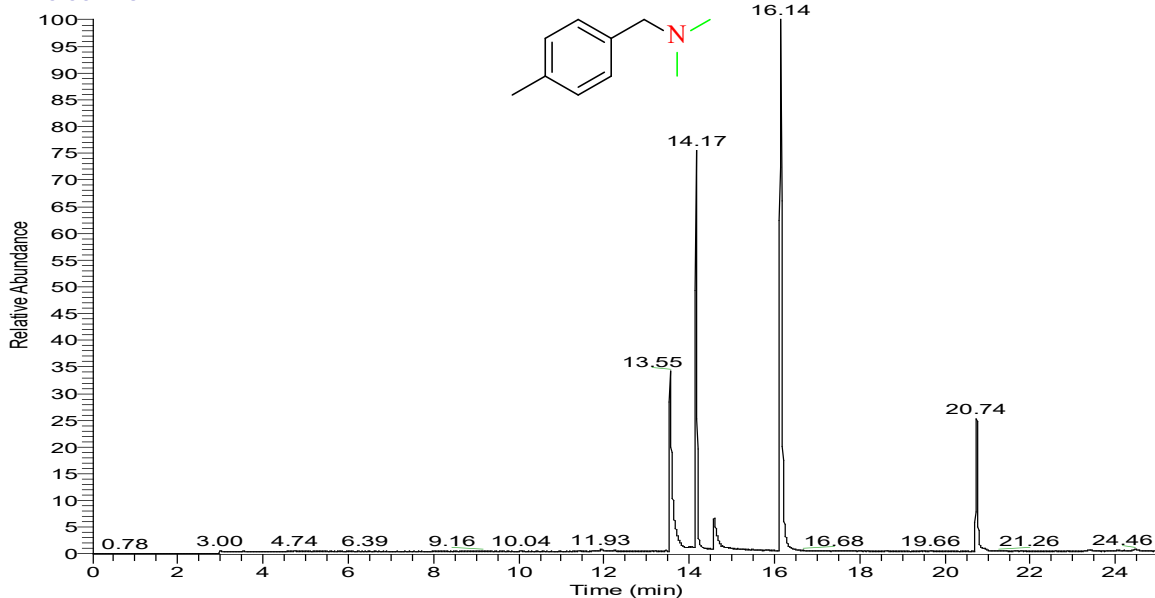

E-47-2 #4156 RT: 14.17 AV: 1 NL: 7.18E7  
T: + c EI Full ms [15.00-400.00]

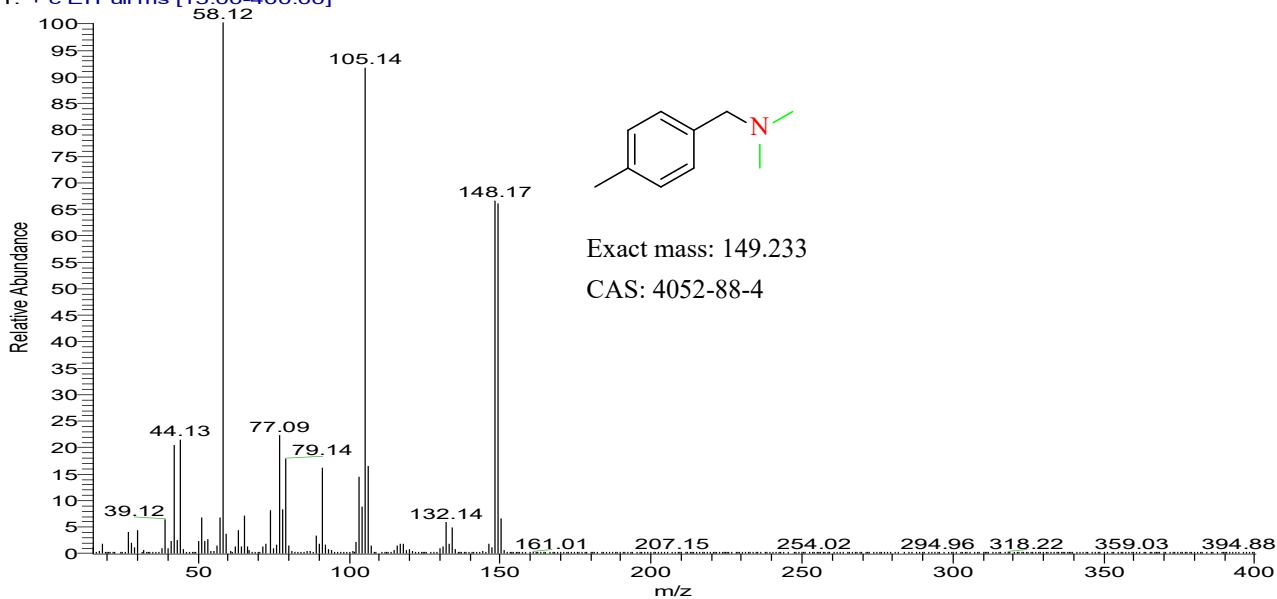

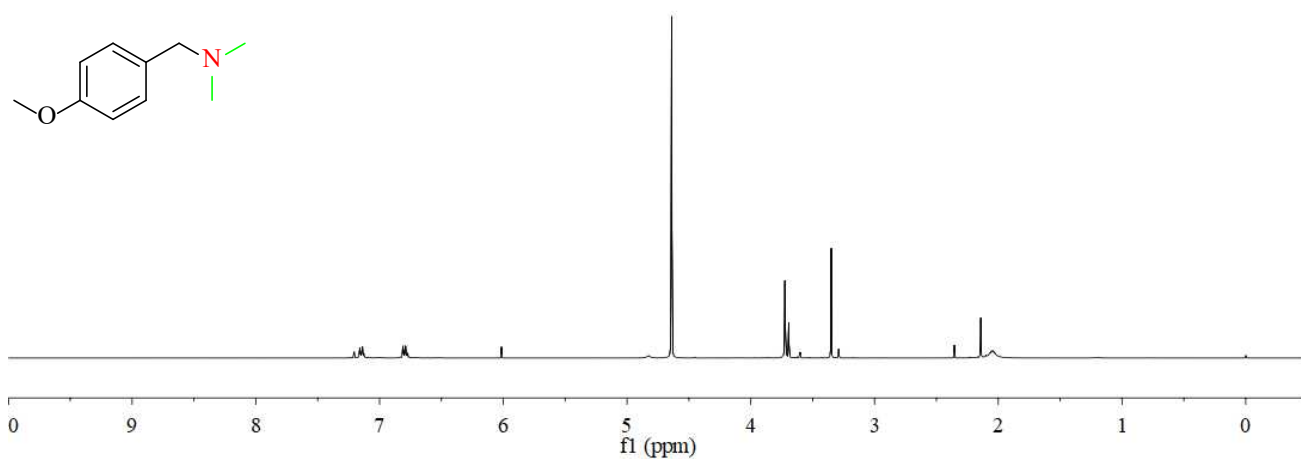

RT: 0.00 - 25.10

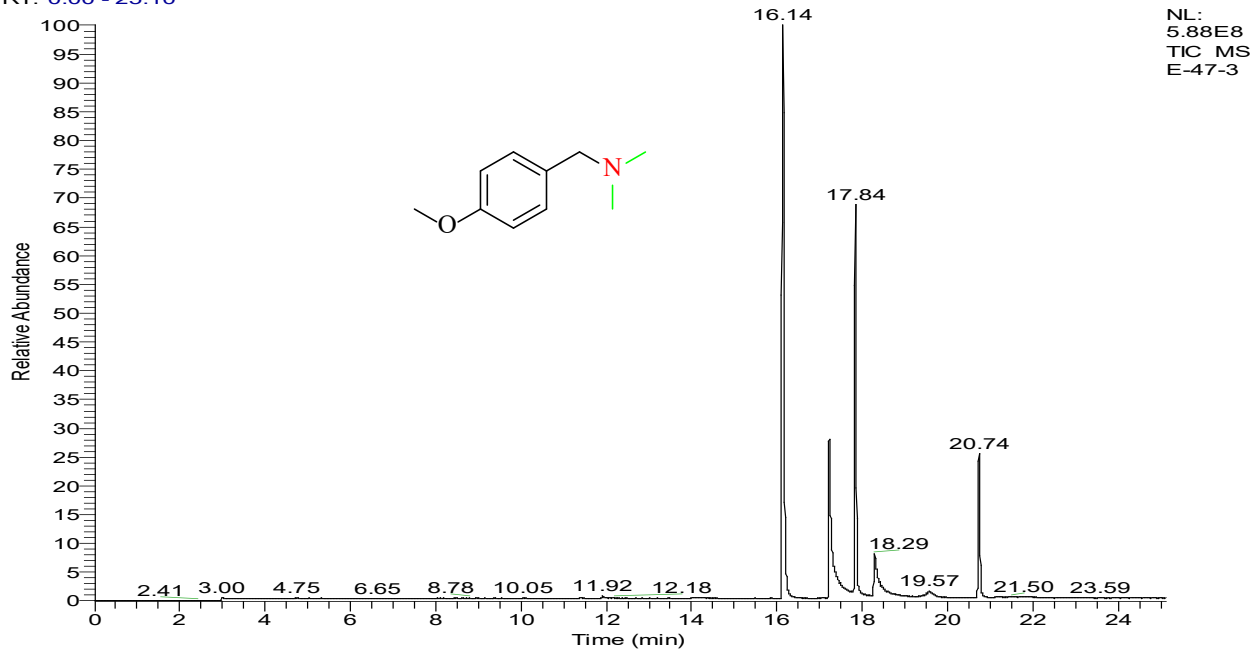E-47-3 #5235 RT: 17.84 AV: 1 NL: 1.29E8  
T: + c EI Full ms [15.00-400.00]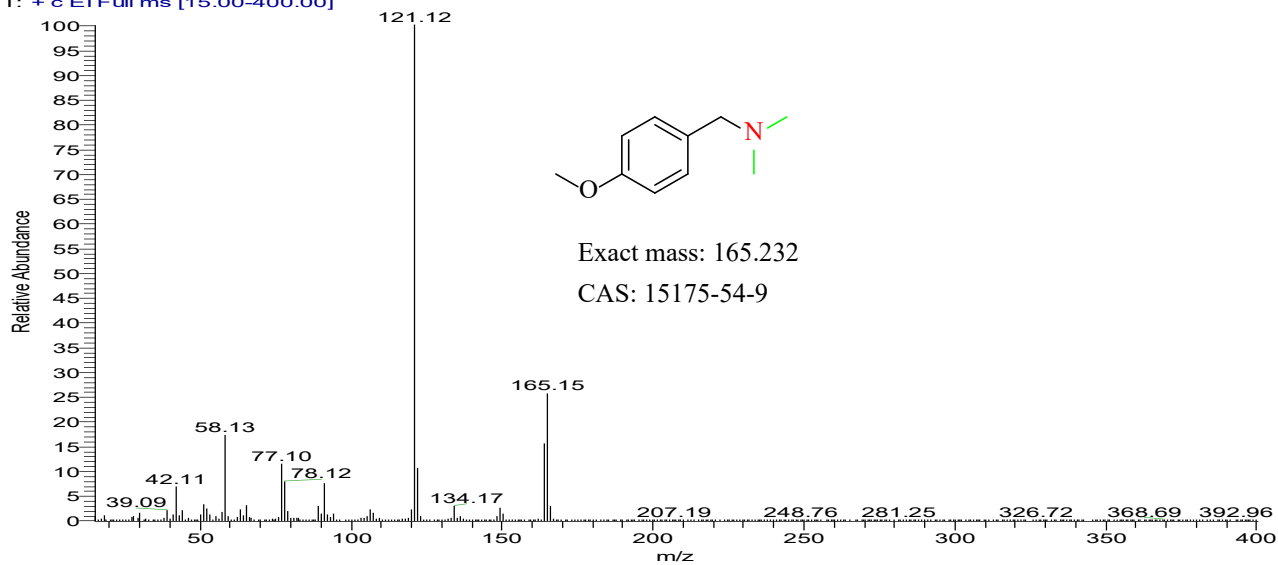

70

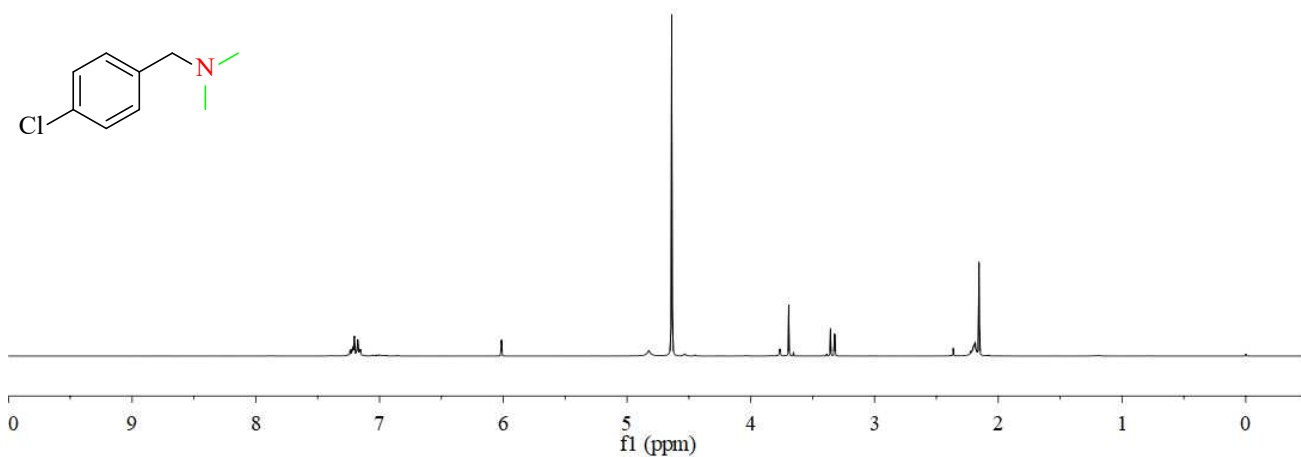

RT: 0.00 - 25.12

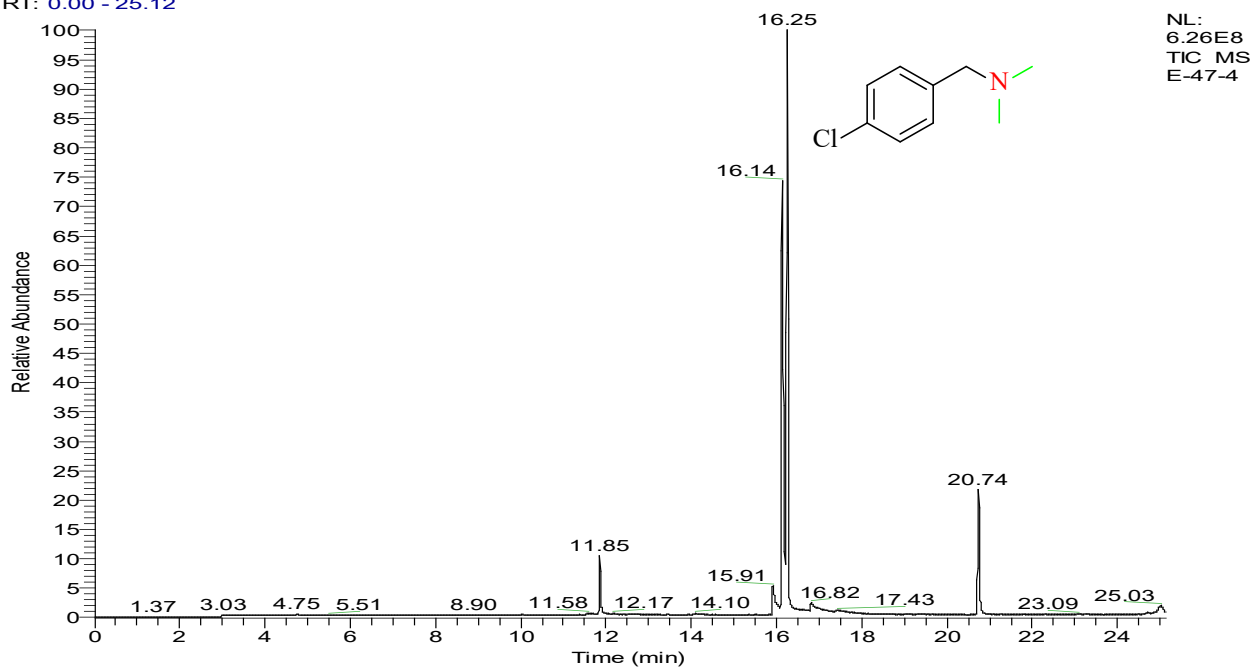

E-47-4 #4769 RT: 16.25 AV: 1 NL: 1.44E8  
T: +c EI Full ms [15.00-400.00]

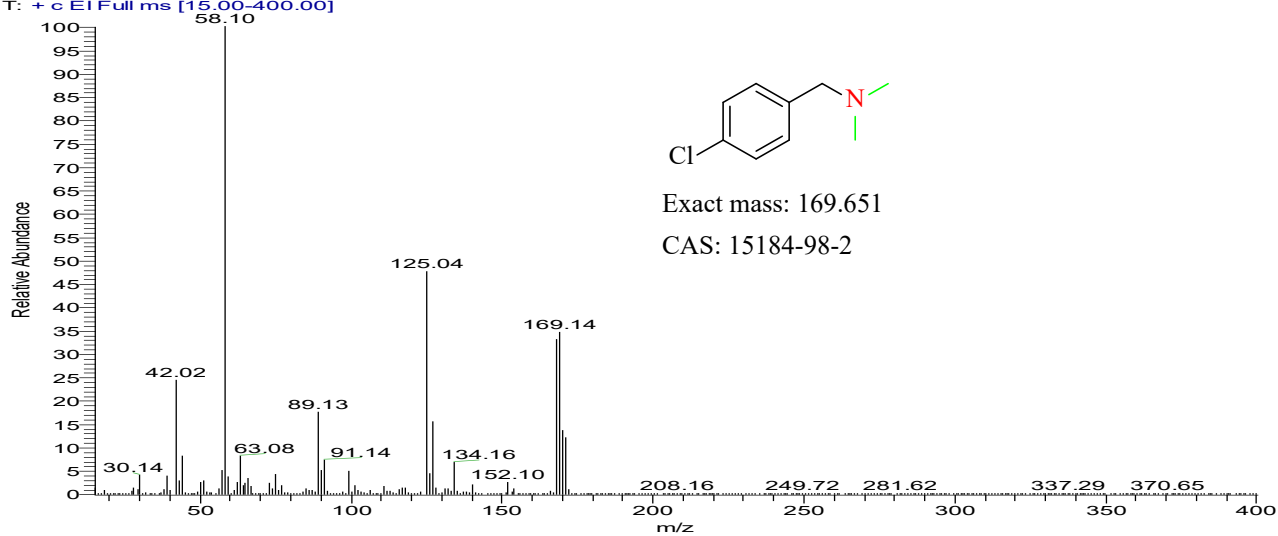

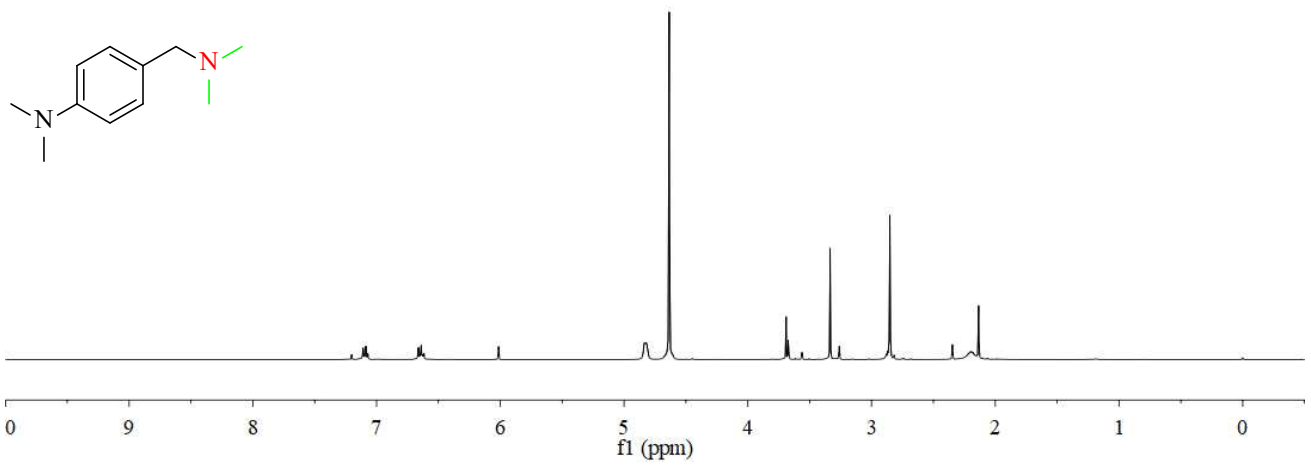

RT: 0.00 - 25.11

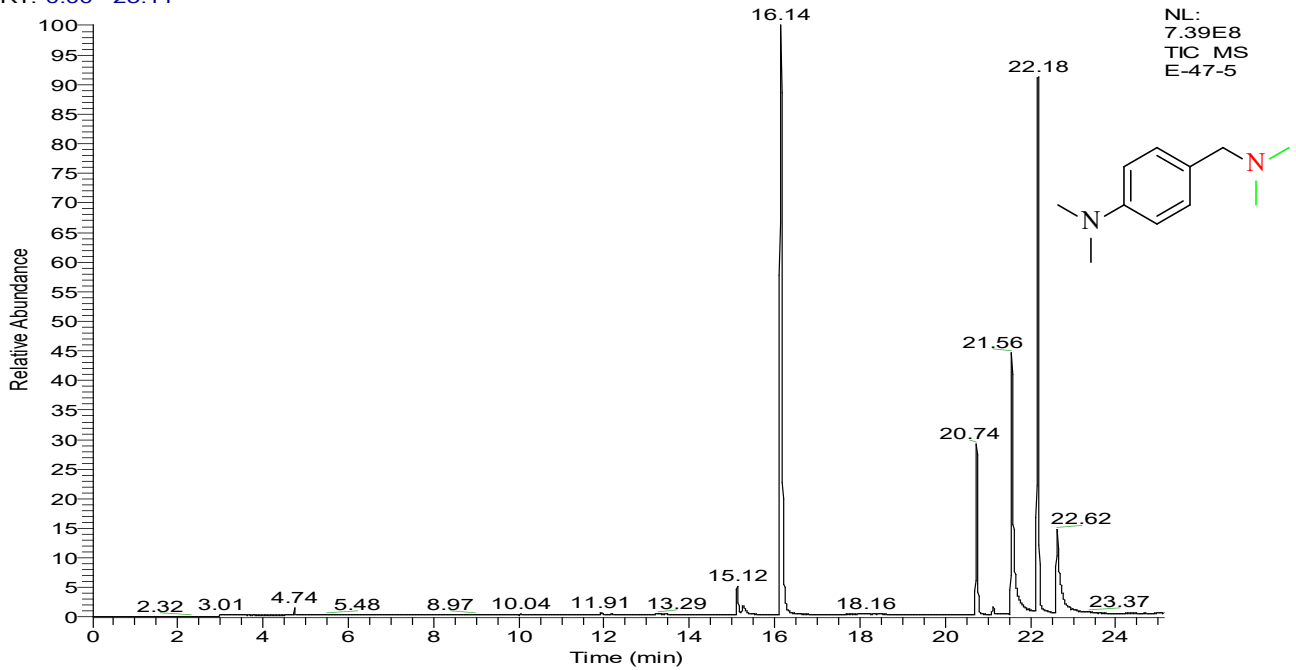E-47-5 #6511 RT: 22.18 AV: 1 NL: 3.34E8  
T: + c EI Full ms [15.00-400.00]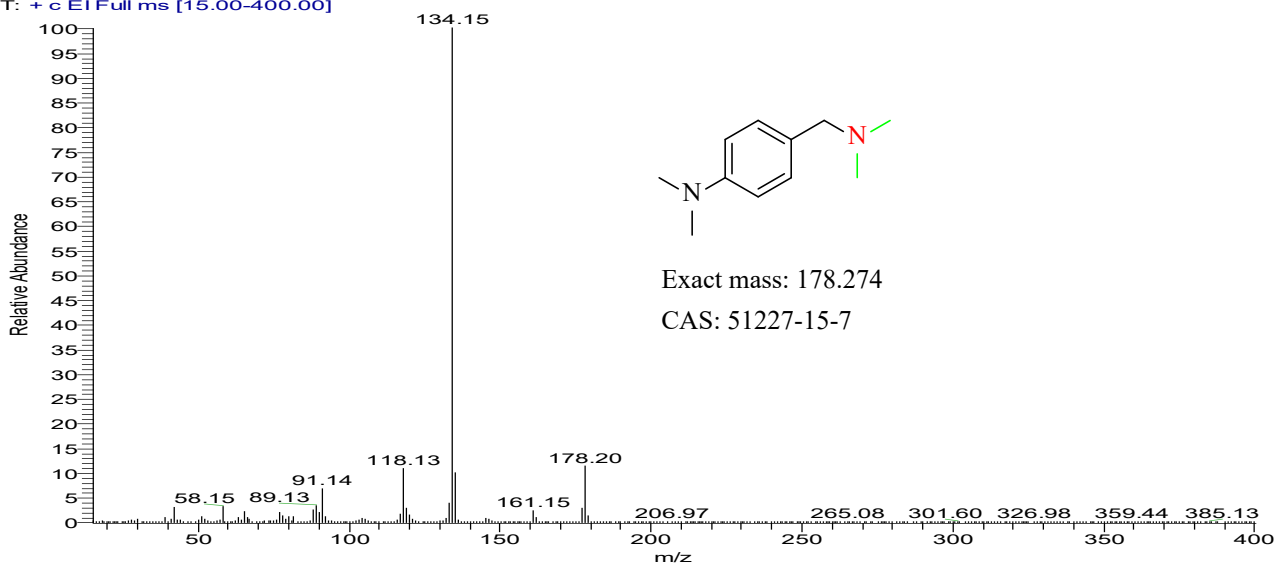

Supplement: d1gc00981h1.pdf [file d1gc00981h1.pdf]
